# Supplementary material for: Kalirin-RAC controls nucleokinetic migration in ADRN-type neuroblastoma
Source: Life Sci Alliance. 2021 Mar 3;4(5):e201900332. doi: 10.26508/lsa.201900332 (PMC8017594; doi:10.26508/lsa.201900332)
Supplement: Supplementary file 7 [file LSA-2019-00332_Table_S2_Table_13.xls]

## Sheet: SOX11-KD DEGs
GeneName	p-value	LOGFC_mean	LOGFC_trimean		Genes encoding MES- and ADRN-specific TFs and potentially regulatable by SOX11(KD)
TXLNGY	0.0495346	-4.64768	-5.0149	LOGFC, log2-transformed fold change	GeneName	p-value	LOGFC_mean	LOGFC_trimean	MES TF
DDX3Y	0.12663	-4.25828	-4.61822		ETS1	0.0495346	4.18042	4.22678	ADRN TF
USP9Y	0.0495346	-4.07142	-4.6139		NR3C1*	0.0495346	1.87516	2.07664
UTY	0.0495346	-4.28794	-4.5316		FLI1*	0.036904	2.15516	2.42708
CCDC144A	0.0495346	-4.02702	-4.23552		PPARG	0.0495346	2.8301	2.80789
EIF1AY	0.0495346	-4.02058	-4.20566		JUND	0.0495346	0.809722	0.713675
SOX11	0.0495346	-3.7504	-3.9432		IRF1*	0.0495346	0.990873	0.979438
ENSG00000230906	0.0495346	-3.54512	-3.90838		ASCL1*	0.0495346	-1.76645	-2.7257
ENSG00000234352	0.0495346	-3.29274	-3.6222		SATB1*	0.0495346	-2.14114	-2.99102
ZNF702P	0.0495346	-3.56617	-3.50988		MYCN*	0.0495346	-2.00563	-2.90751
CCDC144B	0.0495346	-2.68573	-3.48678		ISL1*	0.0495346	-1.85889	-2.29558
CHRNA3	0.0495346	-2.42242	-3.36161		KLF7*	0.0495346	-1.26836	-1.36294
MAMDC2	0.0495346	-2.95328	-3.34754		* SE-associated TFs identified by Boeva et al., 2017 and van Groningen et al., 2017
MARCH11	0.0495346	-3.21761	-3.32581
ARL10	0.0495346	-2.57302	-3.31254		Correlation analysis (excerpts from gene correlation graphs extracted from the R2 database (www.r2.amc.nl)
KIF5C	0.0495346	-2.61227	-3.27039		GeneName(probe)	GeneName(probe)	R	p-value
SCG3	0.0495346	-2.72351	-3.26596		FOSL2*	ETS1(A24_P751074)	0.465	4.9e-28
EIF4E3	0.0495346	-2.59106	-3.21407		A23_P343671	PPARG(A23_P252062)	0.476	1.77e-29
STC1	0.0495346	-2.75294	-3.19454			JUND(A23_P365610)	0.325	1.09e-13
KDM5D	0.0495346	-3.41343	-3.18719		PHOX2B*	ETS1(A24_P751074)	-0.087	0.052
GPRIN3	0.0495346	-2.20248	-3.17632		A23_P213228	PPARG(A23_P252062)	-0.051	0.252
ONECUT2	0.0495346	-2.49057	-3.16437			JUND(A23_P365610)	0.094	0.036
CD24P4	0.0495346	-2.46839	-3.16437		* SE-associated TFs identified by Boeva et al., 2017 and van Groningen et al., 2017
LINC01829	0.0495346	-2.98161	-3.14092
CECR2	0.0495346	-2.55666	-3.12315		RHO-GEF-encoding genes that are potentially regulatable by SOX11(KD)
PROX1	0.12663	-2.00855	-3.11367		GeneName	p-value	LOGFC_mean	LOGFC_trimean	Target GTPases
GATM	0.12663	-2.44701	-3.09518		ARHGEF38	0.0495346	-1.93627	-1.26138	?
NEUROG2	0.12663	-2.25479	-3.09153		TRIO	0.0495346	1.37906	1.59466	RAC1;RHOC
KCNT2	0.0495346	-2.47976	-3.05896		TIAM1	0.0495346	-1.20532	-1.26435	RAC1; RAC1;RAC3; CDC42
AC068286.1	0.0495346	-2.36629	-3.05252		ARHGEF6	0.0495346	1.66218	1.60311	RAC1; CDC42
SLC24A5	0.0495346	-2.79017	-3.02166		KALRN	0.12663	-1.17767	-1.77956	RAC1; RHOA;RHOC
SLCO5A1	0.0495346	-2.75735	-3.02064		DOCK2	0.12663	3.59522	4.01627	RAC2
LIN28B	0.0495346	-2.41873	-3.01716		ARHGEF40	0.12663	1.22815	1.11425	?
RPS4Y1	0.12663	-2.63284	-3.01289		ARHGEF12	0.12663	2.09125	2.20952	RHOA
INSM2	0.0495346	-3.16341	-3.00436		ARHGEF9	0.12663	2.76593	3.12281	CDC42
SYT4	0.0495346	-2.13949	-3.00336		VAV3	0.12663	-1.27119	-2.14509	RAC1; RAC2
KIAA0408	0.0495346	-2.16786	-2.99592
CADM1	0.0495346	-2.24637	-2.99546
ELAVL4	0.0495346	-2.10753	-2.99375
SATB1	0.0495346	-2.14114	-2.99102
CHRM2	0.0495346	-2.746	-2.97702
ZNF492	0.12663	-2.03632	-2.9703
B3GALNT1	0.0495346	-2.23788	-2.95742
MIAT	0.12663	-2.49025	-2.95434
INA	0.12663	-1.86959	-2.94855
SETD6	0.0495346	-2.20454	-2.94001
CLVS2	0.12663	-2.0702	-2.93804
TOX3	0.0463016	-3.65947	-2.93556
ENSG00000237750	0.0495346	-2.0236	-2.93409
FRRS1L	0.0495346	-2.2594	-2.93327
ARMCX4	0.0495346	-2.61987	-2.92482
ENSG00000273018	0.0495346	-2.42611	-2.92381
HAUS1P3	0.0495346	-2.79936	-2.9123
ADAMTS5	0.0495346	-2.40008	-2.90838
MYCN	0.0495346	-2.00563	-2.90751
TRIM71	0.0495346	-1.98028	-2.90583
EYA4	0.0495346	-2.00168	-2.90449
PREX2	0.0495346	-1.87884	-2.89138
LSAMP	0.12663	-1.80942	-2.88559
ADAMTS20	0.0495346	-1.8392	-2.87677
MIR124-2HG	0.0495346	-2.80794	-2.86849
PHOX2B	0.12663	-1.74812	-2.86718
RP11-382B18.4	0.0463016	-2.77373	-2.86036
TEX15	0.0495346	-2.12869	-2.85364
BCL11B	0.12663	-1.97376	-2.84815
ENSG00000231201	0.0495346	-2.84001	-2.83795
CXADR	0.0495346	-2.14678	-2.83652
ENSG00000272477	0.0495346	-2.59789	-2.83406
ENSG00000259796	0.0495346	-2.63731	-2.79492
TRIM9	0.0495346	-2.29329	-2.78707
TSPAN7	0.0495346	-2.74609	-2.77492
KBTBD11	0.12663	-1.85572	-2.77202
FAT3	0.0495346	-2.36927	-2.77183
BCL11A	0.0495346	-1.97975	-2.76681
DCX	0.0495346	-2.0227	-2.74769
AC022087.1	0.0495346	-3.01157	-2.74503
ELAVL2	0.0495346	-1.79509	-2.74389
GREB1	0.12663	-2.76788	-2.73969
ZIC3	0.0495346	-1.90276	-2.73926
ST8SIA3	0.0495346	-1.75769	-2.73349
HMGB1P51	0.0495346	-3.3991	-2.72971
EYA1	0.12663	-1.77697	-2.72758
VASH2	0.12663	-1.76475	-2.72609
ASCL1	0.0495346	-1.76645	-2.7257
PCDH17	0.0495346	-3.04357	-2.72545
AC022893.2	0.12663	-1.50616	-2.72272
ENSG00000228956	0.12663	-1.38246	-2.71857
ANO5	0.0495346	-1.94783	-2.71619
ZBED9	0.0495346	-2.08034	-2.71404
PCYT1B	0.0495346	-1.84247	-2.70893
PLN	0.0495346	-3.20122	-2.68597
COCH	0.0495346	-1.70185	-2.67946
MTAP	0.0495346	-2.05444	-2.67629
SEPT3	0.0495346	-2.17125	-2.67609
AC011897.1	0.12663	-1.79279	-2.67333
PHYHIPL	0.0495346	-2.05602	-2.66577
GABRB3	0.12663	-1.60233	-2.66341
ENSG00000250027	0.0495346	-1.99555	-2.65682
TRIM36	0.0495346	-2.15864	-2.65145
NEUROD1	0.12663	-1.52876	-2.64687
AF127577.4	0.12663	-1.88569	-2.64079
CTNNA2	0.0495346	-2.77503	-2.63842
SHANK2	0.0495346	-2.41422	-2.62975
SLC7A14	0.0495346	-2.04739	-2.62405
RAB39B	0.0495346	-2.10747	-2.62365
ACVR2B	0.0495346	-2.05993	-2.62197
ZNF695	0.12663	-1.6888	-2.62052
TMSB15A	0.12663	-1.72854	-2.61624
ENSG00000273373	0.0495346	-2.05634	-2.61032
PELI2	0.12663	-1.46381	-2.60998
ZMAT4	0.0495346	-2.61711	-2.6095
ENSG00000196167	0.12663	-1.49348	-2.60877
DNAJB7	0.0463016	-2.82764	-2.60619
FAM105A	0.12663	-1.7738	-2.60319
FAM84A	0.12663	-1.50044	-2.59523
SORCS1	0.12663	-1.53383	-2.59491
FGF12	0.12663	-1.89195	-2.58562
PURG	0.0495346	-2.2956	-2.58372
RAB39A	0.12663	-1.68506	-2.57653
NAALAD2	0.0495346	-1.83986	-2.57556
SCN3A	0.0495346	-2.70212	-2.57275
ENSG00000251011	0.0495346	-2.16674	-2.57165
KCNH8	0.0495346	-2.64844	-2.56713
MPPED2	0.0495346	-2.32644	-2.5651
POU5F2	0.0495346	-2.71028	-2.56098
ZNF660	0.0495346	-1.76245	-2.55715
NPY2R	0.12663	-3.67588	-2.55637
CDH7	0.12663	-1.23646	-2.5533
ZNF730	0.0495346	-1.95127	-2.54353
NRCAM	0.12663	-1.96037	-2.54103
CHD7	0.0495346	-1.65368	-2.53633
OLFM3	0.12663	-2.64804	-2.53319
PLD5	0.12663	-1.65944	-2.5302
MIR17HG	0.0495346	-1.85328	-2.52933
ENSG00000267758	0.0495346	-2.16492	-2.52491
ADD2	0.12663	-1.65409	-2.52392
SOGA3	0.0495346	-1.98231	-2.51162
TET3	0.0495346	-1.91422	-2.50991
VCAN	0.0495346	-2.04822	-2.50557
BEND4	0.0495346	-2.0793	-2.49744
HGNC:18790	0.0495346	-2.65921	-2.49726
PPARGC1A	0.0495346	-1.96116	-2.49443
ENSG00000234445	0.0463016	-3.5137	-2.49107
CELF2	0.0495346	-2.07034	-2.4906
CNKSR2	0.0495346	-1.65033	-2.48825
CXCR4	0.0495346	-2.4598	-2.4869
KLHL23	0.0495346	-1.8218	-2.48253
SLC27A2	0.0495346	-2.16559	-2.48161
SYN2	0.12663	-1.54357	-2.47977
FUT9	0.0495346	-1.57823	-2.47962
SLC10A4	0.0495346	-2.56114	-2.4794
PWAR6	0.0495346	-1.86214	-2.4793
SLC6A2	0.0495346	-2.29528	-2.4791
USP44	0.0495346	-2.24761	-2.47797
FAM213A	0.0495346	-1.66405	-2.47615
GALNT13	0.0495346	-1.73893	-2.47152
HK2	0.12663	-1.66258	-2.46166
ENSG00000272005	0.0495346	-1.99295	-2.4614
CCNJ	0.0495346	-2.03594	-2.45657
FGD4	0.0495346	-2.13567	-2.4563
FAM155A	0.0495346	-2.14028	-2.45259
RIMS2	0.12663	-1.27931	-2.45224
EFCAB13	0.0495346	-2.10405	-2.45133
ATL1	0.12663	-1.48593	-2.43794
AC023115.1	0.0495346	-2.22125	-2.43258
FAM107B	0.12663	-1.56105	-2.4189
ZNF711	0.0495346	-1.77036	-2.41721
ENSG00000257191	0.0495346	-1.88504	-2.41151
SALL2	0.12663	-2.78514	-2.40524
ENSG00000199933	0.0495346	-3.17257	-2.40419
HSD17B6	0.0495346	-3.14642	-2.40209
AL355852.1	0.12663	-3.53427	-2.39831
THSD7B	0.12663	-1.38058	-2.39478
ZNF704	0.0495346	-2.18182	-2.39013
LINC02024	0.0495346	-3.06549	-2.38928
SESN3	0.0495346	-1.80841	-2.3874
PAG1	0.0495346	-1.69356	-2.38406
GLCCI1	0.0495346	-2.01406	-2.38267
GPR82	0.12663	-2.52778	-2.38084
MANSC1	0.0495346	-2.87667	-2.38038
EFNA5	0.0495346	-1.72988	-2.37963
STOX2	0.12663	-1.72495	-2.37799
BDH1	0.12663	-1.94934	-2.37652
RIMKLA	0.12663	-1.43311	-2.37595
CHRNA5	0.0495346	-2.07271	-2.37281
PTPRO	0.0495346	-1.95729	-2.37249
SCAF4	0.0495346	-2.36933	-2.36624
CHAMP1	0.0495346	-2.13483	-2.36612
BMP2	0.0495346	-2.76526	-2.35005
MAP2	0.0495346	-1.64538	-2.34999
DNMT3A	0.12663	-1.80129	-2.34717
GLDC	0.12663	-1.5363	-2.34582
MTSS1	0.0495346	-1.99579	-2.34467
LINC01695	0.0495346	-2.45059	-2.3404
ENSG00000197644	0.0463016	-3.50942	-2.33669
APOOP5	0.0463016	-3.49277	-2.33653
KCTD8	0.12663	-1.52758	-2.33557
SNAP91	0.0495346	-2.78881	-2.3351
AHR	0.0495346	-1.99839	-2.33357
RFX3	0.0495346	-2.01359	-2.3252
BNIP3P38	0.0495346	-3.41501	-2.32479
RIMS3	0.12663	-1.50118	-2.32462
FAM184A	0.0495346	-1.53722	-2.32431
JAKMIP2	0.0495346	-1.77037	-2.32364
ENSG00000235749	0.121335	-3.52517	-2.32211
RUNX1T1	0.0495346	-2.02175	-2.32108
HAUS6P2	0.121335	-3.45436	-2.31854
ENSG00000245552	0.12663	-3.19482	-2.31763
LINC01798	0.12663	-1.74081	-2.31568
NELL2	0.12663	-1.40364	-2.31078
PRDM5	0.0495346	-1.7279	-2.30589
CKMT2	0.0495346	-2.88368	-2.30416
MEX3A	0.0495346	-1.61279	-2.30106
GRIA2	0.0495346	-2.01974	-2.29969
ZNF286B	0.0495346	-1.81041	-2.29928
SH3GL3	0.12663	-1.39658	-2.29633
ISL1	0.0495346	-1.85889	-2.29558
ENSG00000260400	0.0495346	-2.1455	-2.293
GCH1	0.0495346	-2.40619	-2.29175
ADGRL3	0.0495346	-1.74004	-2.2908
ZFP3	0.12663	-1.441	-2.28391
FIGN	0.0495346	-1.94689	-2.28382
AC018630.2	0.12663	-1.57735	-2.2811
ZNF717	0.0495346	-1.94235	-2.27645
SRSF12	0.0495346	-1.76699	-2.2761
PRG4	0.0495346	-2.90115	-2.27434
SMIM18	0.0495346	-1.88778	-2.27338
MYEF2	0.0495346	-1.88074	-2.27152
MLLT11	0.0495346	-1.58208	-2.26996
AC010203.1	0.0495346	-3.1061	-2.2695
REEP1	0.0495346	-1.54921	-2.26453
ENSG00000259758	0.0495346	-1.8838	-2.25661
ENSG00000267402	0.0495346	-2.014	-2.25011
ZNF66	0.0495346	-2.57263	-2.2491
AFF2	0.12663	-1.44639	-2.24555
ZNF124	0.12663	-1.38091	-2.24468
ENSG00000244332	0.12663	-2.39688	-2.24235
ENSG00000270109	0.0495346	-2.97708	-2.23692
SGCD	0.0495346	-1.56087	-2.23664
ENSG00000266045	0.0495346	-1.86733	-2.23588
NKX6-1	0.12663	-2.25012	-2.23496
RRAGD	0.0495346	-2.07136	-2.23495
ENSG00000261762	0.0495346	-2.0612	-2.23462
ENSG00000196648	0.0495346	-2.90348	-2.22928
VANGL2	0.12663	-1.60722	-2.22921
ZNF670-ZNF695	0.0495346	-1.86946	-2.22625
GREB1L	0.0495346	-1.71581	-2.21095
GRIA4	0.0495346	-2.43604	-2.20548
MEX3B	0.0495346	-1.94546	-2.20539
LRRC8B	0.0495346	-1.60488	-2.20353
ENSG00000212248	0.12663	-3.33949	-2.20019
TAS2R50	0.0495346	-2.62275	-2.19891
NETO1	0.0495346	-1.88192	-2.19649
HLF	0.0495346	-2.23203	-2.1946
AC023813.2	0.0495346	-2.80335	-2.19376
MARCH1	0.0495346	-1.69959	-2.19324
NME9	0.0495346	-2.36415	-2.19177
ZC4H2	0.0495346	-2.04381	-2.18981
LRRIQ1	0.0495346	-1.88781	-2.1878
ENSG00000238853	0.121183	-3.09975	-2.18385
ENSG00000233061	0.0495346	-2.57056	-2.18289
MARK1	0.12663	-1.34283	-2.1803
ENSG00000271936	0.0495346	-3.03061	-2.18026
ENSG00000229955	0.12663	-1.78618	-2.17973
RTN1	0.0495346	-1.59402	-2.17826
LRRC9	0.0495346	-2.57664	-2.17769
NRXN1	0.0495346	-1.75496	-2.17762
HFM1	0.0495346	-1.70494	-2.17575
KCND3	0.0495346	-2.80989	-2.17338
CCDC169	0.12663	-1.86831	-2.16914
LYSMD4	0.12663	-1.86382	-2.16698
COX20	0.0495346	-1.94232	-2.16646
ENSG00000201850	0.12663	-3.1235	-2.1662
GOLGA8A	0.0495346	-1.70712	-2.15432
LINC00907	0.12663	-1.45889	-2.15094
VAV3	0.12663	-1.27119	-2.14509
ENSG00000240758	0.0495346	-2.77742	-2.14424
TMEM169	0.12663	-1.35414	-2.14109
ENSG00000235795	0.0495346	-2.83789	-2.13964
MAPK10	0.12663	-1.92013	-2.13947
RRN3P1	0.12663	-1.35387	-2.13813
YWHAZP4	0.0495346	-1.90541	-2.13603
PPM1L	0.0495346	-1.6045	-2.13276
AGAP5	0.12663	-3.03243	-2.12973
ENSG00000199691	0.0495346	-3.1881	-2.12683
ENSG00000224855	0.0495346	-2.69954	-2.12682
KIAA1211	0.12663	-1.35989	-2.12677
ZDHHC15	0.0495346	-1.60293	-2.12156
GLI3	0.12663	-1.44008	-2.12001
ID4	0.0495346	-2.15255	-2.11877
AC124045.1	0.0495346	-2.42158	-2.1187
AC022498.1	0.0495346	-3.07554	-2.11664
PPM1AP1	0.0495346	-2.51926	-2.11603
AC027271.1	0.12663	-2.3938	-2.11561
CDC7	0.12663	-1.37334	-2.11495
MAGI1	0.0495346	-1.66572	-2.11465
ENSG00000130600	0.12663	-2.30108	-2.11088
SORD	0.0495346	-1.99171	-2.10753
GPR89B	0.12663	-2.4146	-2.10746
PAK1	0.12663	-1.41851	-2.10699
TAS2R31	0.0495346	-1.93293	-2.10597
ZNF781	0.0495346	-1.51384	-2.10541
MYO5B	0.0495346	-2.05825	-2.10191
GDPD1	0.0495346	-1.51027	-2.09918
ZNF608	0.0495346	-1.81636	-2.09683
ENSG00000261428	0.0495346	-2.25866	-2.09598
RALGAPA1P1	0.0495346	-1.95067	-2.09551
IGF2BP1	0.0495346	-1.55316	-2.09311
NTNG1	0.12663	-1.82817	-2.09052
PLXDC2	0.12663	-1.64353	-2.08967
BLM	0.0495346	-1.4527	-2.07787
CCDC181	0.0495346	-2.02806	-2.07614
HUNK	0.0495346	-2.57822	-2.07408
PEX5L	0.12663	-1.41926	-2.06943
FZD3	0.0495346	-1.84227	-2.06825
RPL7P39	0.121183	-2.97642	-2.06677
MAPK6PS3	0.0495346	-2.79397	-2.06472
POU2F1	0.0495346	-1.72999	-2.06058
ITPKB	0.12663	-1.65639	-2.05919
UNC80	0.0495346	-1.49769	-2.056
AL031320.1	0.0495346	-2.2893	-2.05376
RAB30	0.12663	-1.48476	-2.05196
SLC16A10	0.0495346	-1.44354	-2.04441
ENSG00000232775	0.0495346	-2.17956	-2.03642
CCDC138	0.0495346	-1.51004	-2.03261
FANCM	0.0495346	-1.48077	-2.03146
ENSG00000231329	0.12663	-3.00946	-2.03122
ZNF519	0.0495346	-1.86207	-2.02813
PALM2	0.0495346	-2.12501	-2.02698
B3GALT1	0.12663	-1.18332	-2.02581
ENSG00000236194	0.0495346	-1.74377	-2.02518
EXO1	0.0495346	-1.39574	-2.02507
SNURF	0.12663	-2.23619	-2.0222
LINC00682	0.12663	-1.22782	-2.01904
NBR2	0.12663	-2.31804	-2.01721
CHORDC1	0.0495346	-1.58602	-2.01245
ZNF804A	0.0495346	-1.87439	-2.00827
FSD1L	0.0495346	-1.68721	-2.00528
ZNF483	0.0495346	-1.5774	-2.00488
SV2C	0.12663	-1.23711	-2.00302
EMC3-AS1	0.0495346	-1.84351	-1.9993
FLVCR1	0.0495346	-1.45506	-1.99687
GJC1	0.0495346	-1.62489	-1.99293
AC024558.1	0.0495346	-2.6663	-1.99266
AP3B2	0.0495346	-1.53681	-1.98954
CHRM5	0.0495346	-2.87246	-1.98712
RNFT2	0.0495346	-1.68813	-1.98535
AL356019.2	0.0495346	-2.70541	-1.98292
ENSG00000259663	0.0495346	-1.69993	-1.9813
PRTG	0.0495346	-1.89287	-1.9794
AC012170.3	0.0495346	-2.93642	-1.9792
AC008115.2	0.12663	-2.92291	-1.9769
FAM117B	0.0495346	-1.85946	-1.97308
ENSG00000235740	0.12663	-3.00411	-1.96711
LINC00662	0.12663	-1.21051	-1.96683
RP5-1024G6.8	0.12663	-1.34859	-1.96302
AC090229.1	0.12663	-2.56639	-1.96265
IFNA17	0.121335	-3.11605	-1.96189
SYT16	0.12663	-1.31959	-1.9559
ERC2	0.0495346	-1.38057	-1.95342
LIPI	0.12663	-1.49595	-1.95227
ENSG00000224078	0.0495346	-1.42891	-1.95156
AL583843.1	0.121183	-1.03821	-1.95081
PROSER1	0.0495346	-1.54922	-1.94896
TMEM133	0.0495346	-1.66484	-1.94535
LRRTM2	0.0495346	-2.67472	-1.94419
CHML	0.0495346	-1.5106	-1.94221
IRAK1BP1	0.12663	-1.42801	-1.94098
ENSG00000261529	0.0495346	-2.65393	-1.93924
AL391684.1	0.0495346	-2.13387	-1.93568
ENSG00000232184	0.0495346	-2.04526	-1.93324
SERTAD4	0.0495346	-1.85124	-1.93174
LDLRAD3	0.12663	-1.28392	-1.92998
AC092835.1	0.0495346	-1.70552	-1.92598
MTMR7	0.0495346	-2.17715	-1.92469
ZNF518A	0.0495346	-1.66666	-1.92294
ADH4	0.12663	-2.90038	-1.92252
AC138409.2	0.12663	-1.51522	-1.92226
LRRC69	0.0495346	-1.65607	-1.92201
MAP1A	0.12663	-1.4799	-1.9217
MRPL45P2	0.12663	-1.18546	-1.91828
PRPF38B	0.0495346	-1.75517	-1.9178
PRPS1P2	0.0495346	-3.04833	-1.9176
LINC01801	0.0495346	-2.81219	-1.91709
AC108693.1	0.0495346	-2.5843	-1.91363
ENSG00000248445	0.0495346	-1.89282	-1.91213
ARID3A	0.12663	-2.09601	-1.91023
BEND3	0.0495346	-1.75169	-1.9102
ENSG00000257475	0.0495346	-2.84595	-1.90808
KIAA1958	0.12663	-1.37525	-1.90706
RFX7	0.0495346	-1.6048	-1.9068
AL359075.1	0.12663	-2.87505	-1.90668
RNF144A	0.12663	-0.99479	-1.90644
KCNG3	0.0495346	-1.54289	-1.90539
RGS5	0.0495346	-2.80257	-1.9046
ENSG00000259617	0.0495346	-2.76597	-1.90422
HERC5	0.12663	-1.38139	-1.90416
FAM227A	0.0495346	-1.74842	-1.89693
SPATA1	0.12663	-2.9176	-1.89627
MMP16	0.0495346	-1.56422	-1.89449
STXBP5L	0.12663	-1.04509	-1.89237
LHX2	0.12663	-2.57641	-1.88827
PTCH1	0.0495346	-1.66844	-1.8858
ENSG00000272254	0.0495346	-2.60201	-1.88454
ENSG00000236333	0.0495346	-1.98731	-1.88135
ST8SIA2	0.12663	-1.53787	-1.88088
AADAT	0.0495346	-1.43357	-1.88036
SDHAP3	0.0495346	-1.7275	-1.87968
ENSG00000252365	0.0463016	-2.34201	-1.8795
GFRA2	0.12663	-1.11061	-1.87771
LINC01797	0.12663	-1.38463	-1.87613
XPNPEP3	0.12663	-1.50664	-1.87411
C12orf57	0.0495346	-2.41294	-1.87113
ENSG00000266969	0.0495346	-1.87703	-1.87037
ENSG00000254622	0.0463016	-2.78016	-1.86999
ZNF331	0.0495346	-2.05244	-1.8699
ENSG00000252061	0.0495346	-2.8449	-1.86941
GPR63	0.0495346	-1.46653	-1.86848
ADGRB3	0.0495346	-1.42627	-1.86806
AL353718.1	0.0463016	-2.72185	-1.86594
ENSG00000248050	0.0495346	-1.76875	-1.86553
CACNB4	0.0495346	-1.86282	-1.86527
ENSG00000256315	0.0495346	-1.60252	-1.86383
ENSG00000270189	0.0495346	-1.82315	-1.86183
HOMER2	0.0495346	-1.89392	-1.85933
RNF38	0.0495346	-1.90572	-1.85402
ZBTB39	0.12663	-1.67213	-1.85177
SOX4	0.12663	-1.2224	-1.85023
ENSG00000213971	0.12663	-1.33438	-1.84749
FAM161A	0.0495346	-1.62269	-1.84631
GPR171	0.121183	-1.10314	-1.84502
SMAD9	0.0495346	-1.71896	-1.84096
PPFIA2-AS1	0.12663	-2.51342	-1.83915
ENSG00000226819	0.121183	-1.81167	-1.83763
GNG4	0.12663	-1.43598	-1.83741
RNF165	0.12663	-1.20893	-1.83722
RASGRP1	0.0495346	-1.61821	-1.83701
CTAGE14P	0.036904	-2.29183	-1.83572
ENSG00000236065	0.0495346	-2.07958	-1.83463
AL359504.2	0.12663	-1.96911	-1.83254
ENSG00000188206	0.0495346	-1.76563	-1.83191
ENSG00000272699	0.0495346	-2.3014	-1.8316
PGAP1	0.0495346	-1.64906	-1.83154
CEP152	0.0495346	-1.64339	-1.83086
AL132989.1	0.0495346	-2.17717	-1.82802
AC092685.1	0.0495346	-2.34909	-1.82777
GPR183	0.12663	-2.23364	-1.82595
AC092574.1	0.0463016	-2.30187	-1.82551
PRMT6	0.12663	-1.25786	-1.82278
AC010486.2	0.121335	-2.78045	-1.82049
AL136146.1	0.0495346	-2.41932	-1.81971
AC083843.2	0.0495346	-1.61587	-1.81953
RNF17	0.0495346	-2.71326	-1.81918
CEP164P1	0.12663	-1.85457	-1.81865
AC140134.1	0.0495346	-2.91948	-1.81811
GABPB2	0.12663	-1.39967	-1.81674
CLLU1OS	0.121335	-2.84824	-1.81553
SYT14	0.12663	-1.33817	-1.81511
CHODL	0.0495346	-1.73107	-1.81461
ENSG00000259986	0.0495346	-2.146	-1.81389
GPR137C	0.0495346	-1.79471	-1.81229
THAP9	0.12663	-1.30586	-1.81211
AP000719.1	0.12663	-2.85783	-1.81026
OCLM	0.0495346	-1.98818	-1.80802
ENSG00000239877	0.12663	-2.00359	-1.80795
ENTPD1	0.12663	-1.17895	-1.80764
RORB	0.0495346	-1.52833	-1.80746
CCDC112	0.0495346	-1.68134	-1.80703
ENSG00000241684	0.12663	-2.65027	-1.80609
ENSG00000241409	0.0495346	-2.30291	-1.80587
OMG	0.0495346	-2.0043	-1.80517
ENSG00000267356	0.0495346	-2.09146	-1.80473
H2AFY2	0.12663	-0.899111	-1.80457
P2RY14	0.12663	-1.28146	-1.8016
FO681548.1	0.0495346	-2.87966	-1.80015
IGF1R	0.0495346	-1.35952	-1.7955
FAM60A	0.0495346	-1.35851	-1.79403
MAOA	0.12663	-1.0803	-1.79367
AC084824.2	0.12663	-2.4549	-1.79323
ENSG00000256403	0.0463016	-2.80746	-1.78974
CENPF	0.0495346	-1.42434	-1.7895
ZNF423	0.12663	-1.13227	-1.78661
ZNF620	0.12663	-1.15364	-1.78648
CAMK4	0.12663	-1.38683	-1.78425
ZSCAN12	0.0495346	-1.33204	-1.78412
PTGER3	0.0495346	-2.25265	-1.78294
ZNF195	0.0495346	-1.45878	-1.78283
KALRN	0.12663	-1.17767	-1.77956
VIP	0.12663	-2.13209	-1.77106
OGN	0.0495346	-1.81238	-1.76939
ATAD5	0.0495346	-1.30086	-1.76917
MTF2	0.12663	-1.20301	-1.76692
ENSG00000271870	0.12663	-1.53177	-1.76669
ENSG00000272511	0.12663	-1.07869	-1.76557
STAC	0.0495346	-1.54122	-1.764
SSBP3	0.12663	-1.37389	-1.76317
ASAH2B	0.0495346	-1.37438	-1.75884
DGKB	0.0495346	-2.17138	-1.7541
AL354808.2	0.0495346	-1.76478	-1.75151
ENSG00000224238	0.036904	-2.815	-1.74696
HELLS	0.0495346	-1.44067	-1.74686
SASS6	0.12663	-1.33464	-1.74482
ARL17A	0.12663	-0.873884	-1.74408
DUSP5P1	0.0495346	-1.35311	-1.73897
TMEM178B	0.12663	-0.9355	-1.73089
ENSG00000261254	0.0495346	-1.91991	-1.72561
ENSG00000232995	0.0495346	-1.40667	-1.72485
JMY	0.12663	-1.35653	-1.72171
MIR4712	0.0495346	-2.21479	-1.71933
ZNF326	0.0495346	-1.29035	-1.71901
POGZ	0.12663	-1.10009	-1.71854
F3	0.12663	-1.10248	-1.71757
AC234782.4	0.121183	-2.43292	-1.71757
PSMD10P1	0.0495346	-1.71157	-1.71689
ENSG00000206592	0.036904	-2.73396	-1.7165
ENSG00000248115	0.0495346	-2.45484	-1.71609
CNTNAP3	0.12663	-0.874901	-1.71475
AC005702.3	0.12663	-2.13035	-1.71331
CREBBP	0.0495346	-1.66455	-1.71261
LMO3	0.0495346	-1.74548	-1.71193
RRP15	0.0495346	-1.30912	-1.71165
ENSG00000199565	0.121183	-2.43034	-1.70818
GAREM1	0.12663	-1.18358	-1.70707
TADA1	0.0495346	-1.25202	-1.70624
ENSG00000267750	0.0463016	-2.66871	-1.70585
AC010999.1	0.0495346	-2.31611	-1.70505
MIR181A1HG	0.0495346	-1.43823	-1.70489
PAQR9	0.0495346	-1.35572	-1.70472
ZBTB10	0.0495346	-1.23372	-1.70367
CCDC38	0.0495346	-2.30889	-1.70354
RYR3	0.12663	-1.11253	-1.70082
NUF2	0.0495346	-1.20736	-1.69844
CEP162	0.0495346	-1.30448	-1.69701
ENSG00000270061	0.0495346	-2.54073	-1.69655
AC104850.1	0.121335	-2.77079	-1.69592
AC093849.1	0.12663	-1.81214	-1.69575
ASNSP3	0.0463016	-2.61531	-1.69443
ZEB1	0.12663	-1.1621	-1.69289
MORC2	0.12663	-1.50301	-1.69165
ARHGAP17	0.12663	-1.86806	-1.69113
BCL7A	0.12663	-1.5384	-1.69026
BRCA1	0.0495346	-1.18325	-1.68623
ANKRD36	0.12663	-1.26708	-1.68366
RANBP17	0.0495346	-1.25885	-1.68322
AC146507.2	0.121183	-2.21045	-1.6832
ENSG00000252928	0.121335	-2.54684	-1.6804
ZNF299P	0.121335	-2.55679	-1.67884
CSRP2	0.12663	-1.17538	-1.67853
FAM49A	0.12663	-1.28183	-1.67833
ARL5B	0.0495346	-1.39469	-1.67782
PLCL2	0.12663	-1.24447	-1.67772
BCL2	0.0495346	-1.53056	-1.67743
TAS2R20	0.0495346	-1.90982	-1.67724
WASF3	0.12663	-0.825398	-1.67458
LINC01828	0.0495346	-1.55576	-1.67406
ENSG00000253854	0.12663	-1.35318	-1.67282
ENSG00000269984	0.0495346	-2.15002	-1.67257
ENSG00000232860	0.12663	-2.08733	-1.671
ENSG00000227170	0.0495346	-1.93248	-1.66948
ENSG00000254353	0.0495346	-1.62039	-1.66726
TRIM33	0.0495346	-1.41886	-1.66542
SETBP1	0.12663	-1.2585	-1.66484
ENSG00000250764	0.12663	-2.63511	-1.66452
KIF5A	0.0495346	-2.02031	-1.66342
TENM4	0.0495346	-2.10649	-1.66338
SOX7	0.0495346	-1.82896	-1.66249
ZNF43	0.0495346	-1.37162	-1.65964
ANOS1	0.12663	-1.51303	-1.65779
LRRC37A4P	0.12663	-1.18216	-1.65735
DDIAS	0.0495346	-1.18268	-1.65519
ZNF644	0.0495346	-1.17399	-1.65476
ENSG00000215424	0.12663	-1.67678	-1.65335
MIR3671	0.12663	-1.40611	-1.65117
ENSG00000269924	0.0495346	-2.22165	-1.64849
AC083801.2	0.121335	-2.69686	-1.64811
TMEM170B	0.12663	-1.08449	-1.64804
C9orf72	0.0495346	-1.35958	-1.64646
U2AF1	0.0495346	-1.39611	-1.64484
ENSG00000254208	0.12663	-1.50078	-1.64416
AP000766.1	0.0495346	-1.8954	-1.64362
LUC7L3	0.0495346	-1.25932	-1.64349
AC107068.1	0.0495346	-1.52293	-1.64283
TM6SF1	0.0495346	-1.42323	-1.64272
POGK	0.0495346	-1.11171	-1.6385
AC025884.1	0.12663	-0.947659	-1.63789
PHF10	0.12663	-1.12348	-1.63771
ENSG00000188693	0.12663	-2.47748	-1.63611
ENSG00000270137	0.0495346	-2.46618	-1.63579
ENSG00000267025	0.0495346	-2.3032	-1.63496
ARHGAP42	0.0495346	-1.37323	-1.6329
CASC15	0.12663	-1.1593	-1.63213
ZGRF1	0.0495346	-1.27526	-1.63211
ENSG00000234281	0.0495346	-1.52631	-1.63005
ENSG00000258441	0.0495346	-1.48036	-1.62887
GEMIN2	0.0495346	-1.24569	-1.62831
FGF10	0.121183	-2.28452	-1.62782
RBM24	0.0495346	-1.30586	-1.62705
TNRC6B	0.0495346	-1.68657	-1.62152
RP11-782C8.2	0.0495346	-1.87233	-1.62129
ENSG00000224738	0.0495346	-2.42725	-1.62094
DNAJC6	0.12663	-1.2316	-1.6208
AC020892.1	0.12663	-2.4276	-1.61937
NOL4	0.12663	-1.10733	-1.61934
ENSG00000232044	0.121183	-2.0226	-1.61773
GKN1	0.12663	-1.81618	-1.61739
SMG7	0.0495346	-1.32172	-1.61694
ENSG00000231079	0.0495346	-2.27022	-1.61582
SNRPN	0.0495346	-1.85128	-1.61565
NFIA	0.0495346	-1.54322	-1.61155
ENSG00000252898	0.12663	-2.23023	-1.60957
LRCH1	0.0495346	-1.50991	-1.60926
ST20	0.12663	-1.42533	-1.60529
KIAA0895	0.0495346	-1.6372	-1.60482
E2F5	0.12663	-0.916679	-1.60472
RTKN2	0.0495346	-1.49988	-1.60333
SLC4A8	0.0495346	-1.74141	-1.60322
CACHD1	0.0495346	-1.29148	-1.60246
LRRC37A2	0.0495346	-1.547	-1.6011
GDAP1	0.0495346	-1.31662	-1.60018
MBTD1	0.12663	-1.00603	-1.59963
E2F8	0.0495346	-1.76197	-1.59819
LCOR	0.0495346	-1.36943	-1.59681
CACNB2	0.12663	-1.19885	-1.59658
TAS2R19	0.0495346	-1.58004	-1.59617
VSTM5	0.121183	-1.96495	-1.59003
RPRD2	0.12663	-1.0815	-1.58872
AC008498.1	0.12663	-2.4957	-1.58813
HNRNPH3	0.0495346	-1.66709	-1.58779
KLHL28	0.0495346	-1.26621	-1.5844
ST8SIA1	0.0495346	-1.67799	-1.58313
C21orf91	0.0495346	-1.35773	-1.58291
PAXBP1	0.0495346	-1.28934	-1.58229
THOC1	0.12663	-1.16116	-1.57982
ZNF724	0.0495346	-1.13556	-1.57794
GPR22	0.0495346	-1.58828	-1.57384
ENSG00000229832	0.0495346	-1.79639	-1.57357
GATAD2B	0.12663	-1.13936	-1.57278
DEPDC1B	0.12663	-1.05781	-1.57089
C6orf58	0.0495346	-2.13921	-1.56904
SS18L1	0.0495346	-1.35878	-1.5688
IQCB1	0.0495346	-1.24883	-1.56792
NEMP1	0.0495346	-1.39013	-1.56726
ENSG00000254397	0.12663	-2.61859	-1.56609
MEIS1	0.0495346	-1.34285	-1.56425
FNIP2	0.12663	-1.02768	-1.56257
MTURN	0.0495346	-1.39285	-1.56223
ZNF253	0.0495346	-1.79804	-1.56221
MFSD9	0.0495346	-2.07987	-1.56213
ENSG00000224113	0.0495346	-1.45037	-1.56092
DAB1	0.12663	-1.27037	-1.55964
MIS18BP1	0.0495346	-1.17546	-1.55846
EPB41	0.12663	-1.05597	-1.55835
ENSG00000246477	0.0495346	-1.28379	-1.55763
FOXRED2	0.12663	-1.34107	-1.55313
ENSG00000225527	0.0495346	-1.79575	-1.55129
ZNF260	0.0495346	-1.57387	-1.54558
SLC38A1	0.0495346	-1.16613	-1.54364
TPMTP2	0.0495346	-2.00715	-1.54309
KCNMB4	0.12663	-1.44173	-1.54218
BRCA2	0.0495346	-1.35223	-1.54196
MIRLET7F1	0.0495346	-2.13985	-1.54022
ITGA1	0.0495346	-1.40906	-1.5366
DICER1	0.0495346	-1.24824	-1.53537
AC016716.1	0.0495346	-2.17244	-1.53417
WDR93	0.0495346	-2.40998	-1.53161
DUSP4	0.0495346	-1.24257	-1.53069
ENSG00000235904	0.0495346	-1.52911	-1.52832
CCT6P1	0.0495346	-1.65778	-1.52761
MAML3	0.12663	-1.36468	-1.52746
ENSG00000273477	0.12663	-2.17716	-1.5273
RBPMS	0.0495346	-1.39663	-1.52633
LRRC34	0.0495346	-1.90507	-1.52608
AC007256.1	0.0495346	-1.5694	-1.52469
GABPB1	0.0495346	-1.39931	-1.52265
ARNT2	0.0495346	-1.40348	-1.52023
MAP3K15	0.0495346	-2.21927	-1.51903
LIN9	0.0495346	-1.1418	-1.51542
ZNF445	0.12663	-1.34031	-1.5145
NOLC1	0.0495346	-1.20551	-1.50789
ENSG00000272016	0.0495346	-1.68169	-1.5078
MDM4	0.0495346	-1.28084	-1.50671
ZNF22	0.12663	-1.03622	-1.50616
MYCBP2	0.0495346	-1.25927	-1.50546
CHST9	0.0495346	-2.2461	-1.50435
KCNIP4	0.0495346	-1.42492	-1.50393
ENSG00000272888	0.0495346	-1.29257	-1.50337
ENSG00000200882	0.12663	-1.97271	-1.49864
ZCCHC11	0.0495346	-1.238	-1.4982
C19orf48	0.12663	-2.16726	-1.49762
DTL	0.0495346	-1.04531	-1.49708
AL135925.1	0.12663	-1.08263	-1.49678
ZNF780B	0.0495346	-1.26329	-1.49675
NAA16	0.0495346	-1.17603	-1.49674
TUBGCP4	0.0495346	-1.27658	-1.49574
MARCKSL1	0.12663	-1.25337	-1.49564
ENSG00000232085	0.0495346	-2.06109	-1.49522
CCDC148	0.0495346	-1.98243	-1.49509
ANKRD46	0.12663	-1.11502	-1.49382
AC026333.1	0.0495346	-2.28758	-1.49088
RRP1B	0.12663	-0.937976	-1.49086
CNTN1	0.0495346	-1.56333	-1.48961
DNAAF2	0.12663	-0.967904	-1.48807
COA7	0.12663	-1.00013	-1.48767
PDE7A	0.0495346	-1.13368	-1.48749
WASF1	0.12663	-0.911422	-1.48555
FARP1	0.0495346	-1.3592	-1.48513
ZNF738	0.0495346	-1.30042	-1.48467
SF3B4	0.12663	-1.01705	-1.48379
LCLAT1	0.0495346	-1.42434	-1.48279
DCP2	0.0495346	-1.38616	-1.48119
NDUFAF4	0.0495346	-1.09691	-1.48117
PYGO1	0.0495346	-1.44924	-1.48072
SGIP1	0.0495346	-1.63806	-1.47988
EPHA4	0.0495346	-1.43019	-1.47988
ENSG00000272767	0.0495346	-2.20501	-1.47857
ZKSCAN8	0.0495346	-1.36068	-1.47823
SKIL	0.0495346	-1.27648	-1.47801
KRT18P61	0.121183	-2.45154	-1.47649
ENSG00000259418	0.0495346	-1.56631	-1.47459
SMARCC1	0.0495346	-1.35266	-1.47397
IVNS1ABP	0.12663	-1.10538	-1.47204
PELI1	0.12663	-0.912118	-1.46916
MFHAS1	0.12663	-1.21549	-1.46896
BRIP1	0.0495346	-1.15601	-1.46888
RORA	0.0495346	-1.7387	-1.46875
SLC44A5	0.0495346	-1.22448	-1.46793
CP	0.0495346	-2.28376	-1.46783
DSCC1	0.0495346	-1.12563	-1.46424
EP300	0.12663	-1.33326	-1.46217
TET1	0.0495346	-1.3035	-1.46051
ZNF713	0.0495346	-1.57233	-1.4584
CASP8AP2	0.0495346	-1.41447	-1.45754
C1orf105	0.0495346	-2.30244	-1.45603
ANKRD36C	0.0495346	-1.15582	-1.45585
CCDC14	0.0495346	-1.1086	-1.45508
NPY5R	0.0495346	-1.9932	-1.45377
AC093157.1	0.0495346	-1.85349	-1.45305
ENSG00000226352	0.0495346	-1.30581	-1.45304
ENSG00000231334	0.036904	-2.42619	-1.45298
RNF139-AS1	0.12663	-1.48398	-1.44569
KIF14	0.0495346	-1.19217	-1.44482
NHLRC3	0.0495346	-1.71144	-1.44467
NAF1	0.12663	-1.15556	-1.44442
ALMS1	0.0495346	-1.10703	-1.44391
AC005996.1	0.0495346	-2.23184	-1.44219
ACSF3	0.12663	-1.835	-1.44212
ENSG00000208317	0.0495346	-1.34436	-1.4418
AC090651.1	0.121183	-1.89275	-1.44109
ENSG00000273402	0.0495346	-1.69469	-1.44069
ENSG00000248240	0.0495346	-2.15205	-1.44
KNTC1	0.0495346	-1.10531	-1.44
ENSG00000231119	0.0495346	-1.9523	-1.43909
DHFR	0.12663	-0.927143	-1.43784
ZNF782	0.0495346	-1.53908	-1.43386
AL353801.1	0.0495346	-2.23174	-1.43289
PLCB4	0.0495346	-1.3975	-1.42964
SLC2A2	0.0495346	-1.32607	-1.42885
PIK3R3	0.0495346	-1.04386	-1.42831
MCTS2P	0.0495346	-1.64132	-1.42486
TEX9	0.0495346	-1.52013	-1.42394
SIAH3	0.12663	-2.16003	-1.42384
ENSG00000229956	0.12663	-1.27675	-1.42349
MYL12AP1	0.121335	-2.35163	-1.41959
PCM1	0.0495346	-1.24277	-1.41942
ENSG00000238317	0.0495346	-2.21671	-1.41836
RNPC3	0.0495346	-1.07378	-1.41726
ZNF708	0.0495346	-1.35992	-1.41592
PNN	0.12663	-1.08219	-1.41484
USP49	0.0495346	-1.02458	-1.41385
PAICS	0.0495346	-1.19084	-1.41187
DNAH14	0.12663	-1.02426	-1.41067
ENSG00000272093	0.0495346	-1.82551	-1.4106
C14orf37	0.12663	-1.27541	-1.41034
RSBN1	0.12663	-1.15253	-1.40672
TPR	0.0495346	-1.1397	-1.40556
C4orf46	0.0495346	-1.19511	-1.40515
HSPA1B	0.12663	-1.00916	-1.4047
FASTKD1	0.12663	-1.04356	-1.40311
TACC2	0.0495346	-1.28368	-1.4022
JPH1	0.0495346	-1.06181	-1.40175
PACRGL	0.0495346	-1.14898	-1.40162
AL390728.4	0.12663	-1.37729	-1.40129
RPLP1	0.0495346	-1.16914	-1.39887
ODF2L	0.0495346	-1.24907	-1.39776
PDLIM3	0.0495346	-1.42189	-1.39703
CCNK	0.0495346	-1.24744	-1.39651
KIF15	0.0495346	-1.21846	-1.39468
HDGFL3	0.0495346	-1.13233	-1.39386
SKP2	0.12663	-0.932475	-1.39249
SLC9C1	0.12663	-1.8729	-1.39159
SH3BGRL2	0.0495346	-1.06997	-1.39108
AC026117.1	0.0463016	-1.87301	-1.39036
ENSG00000260966	0.0495346	-1.19477	-1.38845
SRSF6	0.0495346	-1.24744	-1.38701
STRADA	0.0495346	-1.11649	-1.38688
ENSG00000258137	0.121335	-2.31987	-1.38624
FNBP1L	0.0495346	-1.16832	-1.3861
AC093752.1	0.0495346	-1.25418	-1.38578
SMIM4	0.0495346	-1.746	-1.38334
LRRN3	0.0495346	-1.79406	-1.38301
TULP4	0.12663	-0.937399	-1.38258
TXNP6	0.0495346	-2.14665	-1.38223
FAM135A	0.0495346	-1.33441	-1.3819
ZNF37A	0.0495346	-1.12526	-1.3817
AC080013.4	0.12663	-2.01383	-1.37887
PPAT	0.12663	-1.03259	-1.37766
WDR4	0.12663	-1.58124	-1.37758
GUF1	0.0495346	-1.12541	-1.37733
PHF14	0.12663	-1.03168	-1.37719
PLA2G12AP1	0.0495346	-1.67737	-1.37686
FANCI	0.12663	-0.940615	-1.37458
ZC3H12C	0.0495346	-1.07039	-1.37324
TOGARAM1	0.0495346	-1.02059	-1.37277
ALK	0.12663	-1.33838	-1.37258
RASGRF2	0.12663	-1.14788	-1.37249
ENSG00000227773	0.12663	-1.52964	-1.3711
ENSG00000235477	0.0495346	-1.61936	-1.37036
FGF7P3	0.12663	-1.848	-1.3693
CENPJ	0.0495346	-1.03428	-1.36798
USP1	0.0495346	-1.00927	-1.36729
ELOCP19	0.12663	-1.56949	-1.36574
SLC25A36	0.0495346	-1.26834	-1.36545
CBX5	0.0495346	-1.30356	-1.36507
KLF7	0.0495346	-1.26836	-1.36294
CCP110	0.0495346	-1.30468	-1.36265
CEP120	0.0495346	-1.20056	-1.36257
CPSF6	0.0495346	-1.11542	-1.36208
SUV39H2	0.12663	-0.955346	-1.36129
CDK8	0.0495346	-1.10592	-1.36125
RPAP2	0.0495346	-1.43064	-1.36037
CALML4	0.0495346	-1.12114	-1.36024
CEP72	0.0495346	-1.7293	-1.36011
ZNF609	0.0495346	-1.39657	-1.35839
MIR103A1	0.12663	-1.96122	-1.35753
MYT1L	0.12663	-1.50202	-1.35722
SAMD12	0.12663	-1.14812	-1.3547
RBM12B	0.0495346	-1.34113	-1.35435
SYNPR	0.121183	-2.02964	-1.35424
SP4	0.12663	-1.18838	-1.35398
AC005702.1	0.121183	-1.05789	-1.35278
ENSG00000269965	0.12663	-2.17965	-1.35179
PANK3	0.0495346	-1.15141	-1.35105
TAS2R30	0.12663	-1.25159	-1.35051
CYB5R4	0.0495346	-1.1264	-1.34912
ZNF770	0.12663	-1.22929	-1.34896
ZNF887P	0.12663	-0.902552	-1.3475
TTN	0.0495346	-1.07162	-1.346
CCND1	0.12663	-0.99948	-1.34557
CHD9	0.0495346	-1.03232	-1.34444
DGCR5	0.12663	-1.67461	-1.34281
IRS2	0.12663	-1.49017	-1.34177
INTU	0.12663	-0.992417	-1.34151
EMSY	0.0495346	-1.3566	-1.34095
RBM15	0.0495346	-1.31308	-1.34007
HNRNPA3	0.0495346	-1.35121	-1.33947
HNRNPA0	0.0495346	-1.45388	-1.33864
CLCN5	0.12663	-1.05463	-1.33785
RC3H1	0.0495346	-1.26451	-1.33707
SYCP3	0.12663	-0.971755	-1.33603
ENSG00000226245	0.12663	-1.5687	-1.33384
RMI1	0.0495346	-1.25064	-1.332
SPAG17	0.12663	-1.25988	-1.33173
ENSG00000201785	0.0495346	-2.10177	-1.33122
MBNL3	0.0495346	-1.25798	-1.33035
C1orf112	0.0495346	-0.985786	-1.32934
ENSG00000264701	0.121183	-1.27355	-1.32773
CYP3A5	0.0495346	-1.74522	-1.32555
AC034268.2	0.12663	-2.30032	-1.32465
SIKE1	0.0495346	-1.09599	-1.32461
ATP13A5	0.12663	-1.40288	-1.32442
ENSG00000253636	0.0495346	-1.68894	-1.32424
TSPYL4	0.0495346	-1.03941	-1.32396
OXNAD1	0.12663	-1.21326	-1.32334
GOLGA2P5	0.12663	-0.784381	-1.32305
ENSG00000231074	0.0495346	-1.0268	-1.3225
ENSG00000226772	0.0495346	-1.32875	-1.32222
ATF7IP2	0.0495346	-1.10413	-1.322
RPGRIP1	0.12663	-1.57588	-1.31967
MED12L	0.0495346	-1.67916	-1.31949
U2SURP	0.0495346	-0.994339	-1.31877
DDX20	0.12663	-0.990495	-1.31854
ILF3	0.12663	-1.10777	-1.31841
MAPK8	0.0495346	-1.19722	-1.31793
ENSG00000254330	0.0495346	-1.24046	-1.31555
ZBTB26	0.12663	-1.02926	-1.31458
SETD4	0.0495346	-1.5645	-1.31336
FAM20A	0.12663	-0.978992	-1.31283
USP6NL	0.0495346	-1.17849	-1.31252
GS1-279B7.1	0.0495346	-1.88203	-1.31033
ENSG00000254556	0.12663	-0.906311	-1.31019
FRMD4B	0.12663	-0.931735	-1.30983
ZNF709	0.0495346	-2.03104	-1.30679
TNKS	0.0495346	-0.981437	-1.30621
ENSG00000198477	0.0495346	-1.8082	-1.30614
CENPE	0.0495346	-1.18335	-1.30604
TTC3	0.0495346	-1.23542	-1.3026
SYTL4	0.12663	-1.10186	-1.30196
ENSG00000196810	0.0495346	-1.9426	-1.30067
AP002495.1	0.0495346	-2.0123	-1.29895
ZNF878	0.0495346	-2.10235	-1.29827
CD160	0.12663	-0.960887	-1.29685
TMSB15B	0.12663	-1.23334	-1.29657
ENSG00000248175	0.0495346	-1.20742	-1.29525
NIPSNAP3B	0.12663	-0.939835	-1.29505
WDR76	0.0495346	-1.0183	-1.29385
DONSON	0.0495346	-1.25272	-1.29358
AKAP11	0.0495346	-1.30253	-1.29357
CFAP44	0.0495346	-1.0683	-1.29354
ZFHX3	0.0495346	-1.3632	-1.29124
RPL21P3	0.0495346	-1.9215	-1.29113
HEATR4	0.0495346	-0.972809	-1.29083
ZNF117	0.0495346	-1.39042	-1.29074
PELO	0.0495346	-1.01535	-1.28862
MVB12B	0.0495346	-2.15355	-1.28843
ENSG00000240401	0.12663	-1.00341	-1.28841
ENSG00000237125	0.0495346	-1.2169	-1.28796
ZNF37BP	0.0495346	-1.34198	-1.28725
TGFBR1	0.0495346	-0.946455	-1.28682
BAZ2A	0.0495346	-1.16482	-1.28659
C12orf73	0.0495346	-1.34753	-1.28657
ENSG00000259788	0.12663	-1.42104	-1.28636
NOP56P2	0.0495346	-1.77223	-1.28508
CLDN20	0.0495346	-0.941538	-1.28411
SYNE2	0.0495346	-1.17361	-1.28308
ZNF429	0.0495346	-1.67109	-1.28293
LINC01963	0.0495346	-1.61824	-1.28226
PGM2L1	0.12663	-1.53126	-1.28217
HSPH1	0.0495346	-1.08225	-1.27982
USP37	0.0495346	-0.974018	-1.27805
SSH2	0.0495346	-1.43971	-1.27705
PPIL6	0.0495346	-1.94866	-1.2769
ENSG00000269821	0.0495346	-1.06399	-1.27673
USP46	0.0495346	-1.25963	-1.27666
AC090360.1	0.0495346	-1.90711	-1.27623
MEMO1	0.0495346	-1.62036	-1.27564
ASPM	0.0495346	-1.08668	-1.27537
PTPRD-AS1	0.0495346	-2.05589	-1.27498
PRKAB2	0.0495346	-1.01556	-1.27439
TMEM206	0.12663	-1.01339	-1.27356
ZC3H12B	0.12663	-1.17381	-1.27315
AP002360.4	0.0495346	-1.39741	-1.26995
ENSG00000261654	0.0495346	-1.9429	-1.26939
ZNF280C	0.0495346	-1.04662	-1.26788
YOD1	0.0495346	-1.21865	-1.26775
DDHD1	0.0495346	-1.16958	-1.26625
TIAM1	0.0495346	-1.20532	-1.26435
ARHGEF38	0.0495346	-1.93627	-1.26138
AL390728.6	0.12663	-1.15657	-1.26116
ENSG00000184886	0.0495346	-1.03765	-1.2611
LHFPL4	0.121183	-1.01564	-1.26077
DPY19L3	0.0495346	-1.26889	-1.26065
ELOVL2	0.12663	-0.830078	-1.25929
SDAD1	0.0495346	-1.02123	-1.2589
FUBP1	0.12663	-0.878897	-1.25876
ENSG00000261167	0.0495346	-1.11042	-1.25804
TSACC	0.0495346	-1.30964	-1.25773
ZNF320	0.0495346	-1.20595	-1.25717
HDX	0.0495346	-1.20053	-1.25648
ZNF431	0.0495346	-1.07979	-1.25638
FAM217A	0.12663	-1.67775	-1.256
DNAH7	0.0495346	-1.35537	-1.25433
HSD17B7	0.0495346	-1.10344	-1.25424
ERCC6	0.0495346	-1.82499	-1.25374
ENSG00000179979	0.0495346	-2.09432	-1.2535
TIPIN	0.0495346	-1.15402	-1.25231
ENSG00000260917	0.0495346	-1.81156	-1.25158
SPRTN	0.12663	-1.0819	-1.25132
IREB2	0.0495346	-1.22597	-1.25053
ARHGAP5	0.0495346	-1.05273	-1.25034
COL6A6	0.0495346	-1.30758	-1.24958
PHIP	0.0495346	-1.10831	-1.24954
ZNF669	0.0495346	-0.992181	-1.24939
PPP1R12B	0.0495346	-1.31716	-1.24898
DPYSL5	0.0495346	-1.34127	-1.24768
NUDT13	0.0495346	-1.12691	-1.2476
GUSBP5	0.12663	-2.01931	-1.24665
HEATR1	0.12663	-0.872138	-1.24563
ZSCAN29	0.12663	-0.87043	-1.24527
ENSG00000270081	0.12663	-1.01166	-1.245
ENSG00000247853	0.12663	-1.60267	-1.24464
METTL21A	0.0495346	-1.10214	-1.24434
AGPAT5	0.0495346	-0.940662	-1.24426
CTDSPL2	0.0495346	-1.19324	-1.24398
PRPF39	0.0495346	-0.970051	-1.24314
ZBTB37	0.0495346	-1.04715	-1.24307
ATOH8	0.12663	-1.72123	-1.24221
C1orf27	0.0495346	-0.984775	-1.24051
BRWD1	0.0495346	-1.05069	-1.23974
RNASEH2B	0.0495346	-0.963736	-1.23972
UCHL5	0.0495346	-1.01966	-1.23884
MTBP	0.12663	-1.0612	-1.23851
PRKAA2	0.0495346	-0.994022	-1.23836
ENSG00000202445	0.121335	-2.0292	-1.23834
SPRED2	0.0495346	-1.58632	-1.23823
MRPS25	0.0495346	-0.970133	-1.2362
DNA2	0.12663	-0.937805	-1.23553
PCLAF	0.0495346	-1.15389	-1.23343
AC006994.1	0.12663	-1.09342	-1.23179
PSME3	0.12663	-0.795257	-1.231
ENSG00000260648	0.12663	-1.94823	-1.23007
HSF2	0.0495346	-0.990913	-1.22796
TRAF5	0.12663	-0.917745	-1.22771
TVP23C	0.0495346	-1.39932	-1.2276
BMP2K	0.0495346	-1.2854	-1.22729
KATNBL1P3	0.0495346	-1.57671	-1.22718
NFXL1	0.0495346	-1.31042	-1.22669
AC011978.2	0.0495346	-1.73557	-1.22504
GAN	0.0495346	-1.14509	-1.22452
ENSG00000264885	0.0495346	-1.04828	-1.22434
KANSL1L	0.0495346	-1.02932	-1.22397
CXXC4	0.12663	-1.75311	-1.22355
ZNF93	0.0495346	-1.25492	-1.22301
NPM1P29	0.0495346	-1.566	-1.22195
LINC01364	0.0495346	-0.979869	-1.21983
ENSG00000248773	0.0495346	-1.03873	-1.21915
PARPBP	0.12663	-0.98993	-1.21509
FADS2	0.12663	-1.3206	-1.21435
MMGT1	0.0495346	-1.58249	-1.21365
ENSG00000272054	0.0495346	-1.25956	-1.21315
PPP2R5E	0.0495346	-1.11417	-1.21291
ENSG00000272980	0.12663	-0.859475	-1.21232
SHPRH	0.0495346	-0.898301	-1.21158
ADGRA3	0.12663	-0.842797	-1.21094
C1orf115	0.12663	-1.30064	-1.21036
ENSG00000257596	0.0495346	-1.38618	-1.20836
CACYBP	0.12663	-0.907523	-1.20757
NT5C3A	0.0495346	-1.03543	-1.20751
CEP83	0.12663	-0.948714	-1.20598
ZNF286A	0.12663	-0.849691	-1.20562
RAD18	0.0495346	-1.17849	-1.20536
CCDC150P1	0.0495346	-1.17933	-1.20406
CEP170	0.0495346	-1.05393	-1.20319
AC015813.1	0.12663	-0.973086	-1.20285
G6PC3	0.0495346	-1.02366	-1.2022
AL136310.1	0.0495346	-1.61364	-1.19878
GALNT6	0.12663	-1.6644	-1.19819
ZNF678	0.0495346	-1.14908	-1.19728
GPT2	0.0495346	-1.25664	-1.19655
AL136303.1	0.0495346	-1.17064	-1.19615
KLRA1P	0.0495346	-1.39401	-1.19549
LINS1	0.12663	-0.835879	-1.19367
RNF138	0.0495346	-1.04412	-1.19334
POLE2	0.12663	-1.05633	-1.19203
SNAP25	0.0495346	-1.05395	-1.19191
ZNF891	0.0495346	-1.30946	-1.19155
C2CD3	0.0495346	-0.976654	-1.18977
MDH1B	0.0495346	-1.18339	-1.1884
ACBD6	0.12663	-1.41028	-1.18828
DCLRE1A	0.12663	-0.921685	-1.18822
CCAR2	0.12663	-1.27975	-1.18744
ENSG00000259172	0.0495346	-1.08278	-1.18688
ENSG00000237853	0.0495346	-1.16804	-1.18624
TMEM33	0.0495346	-1.05368	-1.18574
E2F3	0.12663	-0.787747	-1.18486
WDCP	0.12663	-0.73112	-1.18465
KANSL1	0.12663	-0.762127	-1.18422
QSER1	0.12663	-1.09313	-1.18368
ENSG00000246859	0.0495346	-1.10809	-1.18299
FANCL	0.0495346	-1.05892	-1.18191
CADPS	0.0495346	-1.1746	-1.18089
ENSG00000257742	0.0495346	-1.10373	-1.18007
DNTTIP2	0.0495346	-1.03401	-1.17993
ENSG00000229152	0.0495346	-0.93681	-1.17964
CDK6	0.0495346	-1.06373	-1.1794
GTPBP4	0.0495346	-0.968592	-1.17914
AL450344.2	0.121335	-1.95246	-1.17726
TOP1	0.0495346	-1.09346	-1.17629
ENSG00000206573	0.12663	-1.15125	-1.17546
ADSS	0.0495346	-1.26869	-1.1752
CFAP126	0.0495346	-1.25814	-1.17441
SLC36A4	0.0495346	-1.29335	-1.1738
BX322635.1	0.121335	-1.05399	-1.17317
TOP3A	0.12663	-0.895993	-1.17248
GABRP	0.0463016	-1.11921	-1.17227
KDM2B	0.12663	-1.51007	-1.17108
YTHDF1	0.0495346	-1.18586	-1.17026
TSC22D2	0.0495346	-1.03592	-1.17002
AL591848.4	0.12663	-1.21427	-1.16829
HNRNPA3P9	0.12663	-1.23535	-1.16807
ENSG00000226647	0.12663	-0.993549	-1.16734
ENSG00000199436	0.12663	-1.82876	-1.16731
ENSG00000246250	0.0495346	-1.22781	-1.16723
RGS2	0.12663	-0.924464	-1.16598
XPR1	0.12663	-0.963148	-1.16427
ZNF292	0.0495346	-1.06128	-1.164
GBAP1	0.0495346	-1.45456	-1.16381
PLEKHA8	0.0495346	-1.03297	-1.16281
AC068870.1	0.0463016	-1.05795	-1.16274
ZNF594	0.0495346	-1.24928	-1.16273
MCPH1	0.12663	-0.854403	-1.16046
AP1AR	0.0495346	-0.969345	-1.15954
AC090616.6	0.121183	-1.61151	-1.15832
RBBP6	0.0495346	-1.21788	-1.15658
ZNF493	0.0495346	-1.04925	-1.15571
PTAR1	0.0495346	-0.936041	-1.1556
AC026412.2	0.0495346	-1.12424	-1.15494
SLC26A4	0.0495346	-1.13163	-1.15434
EID3	0.12663	-1.74981	-1.15398
AL451074.3	0.0463016	-1.69176	-1.15357
PPP6C	0.0495346	-1.16888	-1.15282
CERS6	0.0495346	-0.884238	-1.15238
FSBP	0.0495346	-1.37598	-1.15181
ENSG00000247137	0.0495346	-1.17809	-1.15149
GPR155	0.0495346	-1.2737	-1.15144
MBL1P	0.0463016	-1.0924	-1.15072
ENSG00000241211	0.12663	-1.20237	-1.1496
CSNK2A2	0.12663	-0.967455	-1.14854
AL117339.4	0.0495346	-1.10192	-1.14748
NGRN	0.12663	-0.736183	-1.14709
ENSG00000199568	0.12663	-1.27803	-1.14699
SMIM8	0.12663	-0.875872	-1.14688
ERCC8	0.0495346	-1.08281	-1.14683
ENSG00000272486	0.0495346	-1.38674	-1.14635
SIAH1	0.12663	-0.936655	-1.14629
FAM217B	0.0495346	-0.915505	-1.14572
HSPBAP1	0.0495346	-1.0928	-1.14538
PFN4	0.0495346	-1.18925	-1.14478
AC026271.1	0.0495346	-1.82393	-1.14395
ENSG00000260252	0.121183	-1.75216	-1.14338
HMBOX1	0.12663	-0.845739	-1.14268
ADAT2	0.0495346	-0.974393	-1.14191
SLC4A5	0.0495346	-1.28627	-1.14167
IKZF5	0.12663	-1.02719	-1.14159
XYLB	0.12663	-1.07193	-1.14075
ZNF852	0.12663	-0.731773	-1.14064
LINC01224	0.0495346	-1.30768	-1.14055
MREG	0.12663	-0.911619	-1.14033
EAF2	0.0495346	-1.25458	-1.1397
STXBP4	0.0495346	-1.05263	-1.13929
PCBP3	0.12663	-0.917361	-1.13834
CEP350	0.0495346	-0.902785	-1.13823
RALGAPA1	0.0495346	-1.08822	-1.13799
ENSG00000261705	0.12663	-1.83397	-1.13786
ADAMTS16	0.0495346	-1.9027	-1.13759
ANKRD10	0.0495346	-0.978298	-1.13712
RUFY3	0.0495346	-0.970123	-1.13695
C8orf48	0.12663	-1.3058	-1.13688
SOHLH2	0.12663	-1.13943	-1.13411
USP54	0.12663	-1.10355	-1.13215
KPNA5	0.12663	-0.761534	-1.1315
CEP128	0.0495346	-1.06201	-1.13148
GTF3C4	0.0495346	-0.915076	-1.13055
YTHDC2	0.0495346	-1.07011	-1.13038
PDE8B	0.12663	-0.930473	-1.13037
ABHD17B	0.0495346	-0.99995	-1.13018
ENSG00000262372	0.12663	-0.968496	-1.13013
MIER3	0.0495346	-0.958557	-1.12941
ZNF507	0.0495346	-0.927891	-1.1289
ZNF501	0.121183	-1.36366	-1.12876
ARPP19	0.0495346	-1.11549	-1.12876
MTMR9	0.12663	-0.782437	-1.12837
ENSG00000261758	0.0495346	-1.92972	-1.12797
ORC6	0.12663	-0.810436	-1.12752
SLC4A7	0.0495346	-1.16818	-1.12735
ENSG00000203362	0.12663	-1.17235	-1.1262
CDC14A	0.0495346	-1.15088	-1.12604
FAIM	0.12663	-0.839907	-1.12452
SORBS1	0.12663	-1.00149	-1.12437
PDZRN3	0.12663	-0.979731	-1.1239
ENSG00000231365	0.12663	-1.30806	-1.12382
MNT	0.12663	-1.07604	-1.12336
CHD1	0.0495346	-1.01002	-1.1232
ZNF397	0.0495346	-0.892637	-1.12276
EPB41L4A-AS1	0.12663	-1.12508	-1.12093
UPF3AP2	0.12663	-1.82369	-1.12087
SUPT7L	0.0495346	-1.16078	-1.12074
CCDC43	0.12663	-0.758401	-1.11951
AGO2	0.12663	-0.941949	-1.11863
CLGN	0.0495346	-1.08177	-1.11812
NOL8	0.0495346	-0.935905	-1.11797
PRKDC	0.12663	-0.773685	-1.11723
LMO4	0.0495346	-0.975602	-1.11653
PLK4	0.0495346	-1.03989	-1.11616
MRPL50	0.12663	-0.842898	-1.11606
ARV1	0.0495346	-1.48108	-1.11497
BPTF	0.0495346	-1.1832	-1.11441
P2RY13	0.0495346	-1.18759	-1.11379
ENSG00000221500	0.12663	-0.910378	-1.11322
MTX3	0.0495346	-1.04116	-1.11309
ENSG00000207117	0.121335	-1.08456	-1.11148
TPD52	0.0495346	-1.32934	-1.11087
CEP295	0.0495346	-0.885947	-1.11069
AF131215.5	0.12663	-1.37616	-1.10979
PRRC2C	0.12663	-0.899583	-1.10967
GAB2	0.12663	-1.29861	-1.10892
USP14	0.12663	-0.972921	-1.10888
CDKL2	0.0495346	-1.64978	-1.10676
UPF3B	0.0495346	-1.36166	-1.1056
ABCC5	0.0495346	-1.26956	-1.10552
TIMM8A	0.12663	-1.01	-1.10468
ENSG00000231889	0.12663	-0.623224	-1.10437
ENSG00000261451	0.0495346	-1.44653	-1.10416
POLD3	0.0495346	-0.826911	-1.10339
PGBD1	0.0495346	-0.962201	-1.10298
ARID2	0.0495346	-1.05312	-1.10239
ZNRD1ASP	0.0495346	-0.997544	-1.10206
ENSG00000263786	0.0495346	-1.15394	-1.10054
ZNF510	0.0495346	-0.913331	-1.09999
RAVER2	0.12663	-0.639074	-1.09873
TRMT10C	0.12663	-0.79741	-1.09859
BRIX1	0.0495346	-1.0211	-1.09842
DLEU2	0.0495346	-1.1268	-1.09817
FAM208B	0.0495346	-0.956168	-1.09775
ENSG00000259118	0.12663	-0.99299	-1.09733
ENSG00000272574	0.0495346	-1.06425	-1.09704
AL365338.1	0.036904	-1.26677	-1.09637
TUBGCP3	0.0495346	-0.88817	-1.09563
TCF3	0.0495346	-1.224	-1.09468
GNG5	0.12663	-0.786987	-1.09233
DMXL2	0.0495346	-0.992178	-1.09041
POLQ	0.0495346	-1.04899	-1.08898
COQ10BP2	0.121335	-0.911301	-1.08829
ZNF248	0.12663	-0.868153	-1.08815
ENSG00000226803	0.0495346	-0.94599	-1.08622
C8orf88	0.12663	-0.910967	-1.08598
WDR35	0.0495346	-0.914737	-1.08585
CCDC150	0.0495346	-1.0161	-1.08352
ENSG00000252975	0.0495346	-0.995948	-1.08289
BTF3L4	0.0495346	-0.928148	-1.08282
ENSG00000232712	0.12663	-1.32916	-1.08255
STRBP	0.0495346	-0.775286	-1.08096
TTC32	0.12663	-1.23145	-1.08096
TSEN2	0.12663	-0.959719	-1.08061
PLEKHA1	0.0495346	-1.05531	-1.0804
TCF12	0.12663	-0.784954	-1.08014
CENPK	0.0495346	-0.963695	-1.07944
HNRNPDL	0.0495346	-0.896829	-1.07846
AC007403.1	0.0463016	-0.850819	-1.07753
ZNF652	0.0495346	-1.03431	-1.07723
CCNE1	0.0495346	-0.831928	-1.07635
SEH1L	0.0495346	-1.16378	-1.07612
SPEN	0.0495346	-1.31654	-1.07582
BCAS2	0.12663	-0.816127	-1.07502
ITGB3BP	0.0495346	-0.995478	-1.07449
ARID1B	0.0495346	-1.13687	-1.07435
AC093227.1	0.0495346	-1.40512	-1.07356
ENSG00000172660	0.0495346	-1.01623	-1.07299
ALG10	0.12663	-0.835635	-1.0725
UBE2D1	0.12663	-1.22925	-1.07185
KDM7A	0.12663	-1.00568	-1.07066
AC119403.2	0.121335	-1.9569	-1.06995
SLC30A10	0.0495346	-1.28699	-1.0693
PIAS1	0.0495346	-1.06873	-1.06907
ZNF512	0.0495346	-1.20394	-1.06899
ST7L	0.12663	-0.888847	-1.06899
GAREM2	0.12663	-1.34101	-1.06865
CDKL1	0.0495346	-1.05341	-1.06864
TTC28	0.12663	-0.755278	-1.06853
NDC1	0.12663	-0.800834	-1.06514
SMARCAD1	0.0495346	-0.981128	-1.06459
SOCS4	0.0495346	-0.971621	-1.06455
BTAF1	0.12663	-0.753897	-1.06386
KCNS3	0.12663	-0.557393	-1.06267
AC084024.2	0.0495346	-1.17296	-1.06194
PARP6	0.0495346	-1.23921	-1.0619
DNAAF5	0.0495346	-0.876119	-1.06007
C18orf54	0.0495346	-1.09275	-1.05881
AC123769.1	0.0495346	-1.46103	-1.05814
RBL1	0.12663	-0.88571	-1.05755
ADNP	0.12663	-0.82446	-1.05547
ESF1	0.0495346	-0.915958	-1.05476
LRRC40	0.12663	-0.779383	-1.05451
SRSF11	0.0495346	-0.946728	-1.05372
ZNF558	0.0495346	-0.922365	-1.05318
ARMCX5	0.0495346	-1.21437	-1.05218
TMEM246	0.0495346	-0.833173	-1.05198
ZNF33A	0.0495346	-1.04772	-1.05186
ZNF101	0.0495346	-1.34042	-1.04841
STX16	0.12663	-1.16741	-1.04754
SFSWAP	0.12663	-0.865405	-1.04669
TMPO	0.0495346	-0.93394	-1.04508
DCAF7	0.12663	-0.806317	-1.04491
ZNF20	0.0495346	-1.30286	-1.04457
WIZ	0.0495346	-1.19488	-1.04404
AC008543.1	0.0495346	-1.00857	-1.04356
AMOTL1	0.0495346	-0.795906	-1.04351
TTTY10	0.121335	-0.928629	-1.04313
LRP8	0.12663	-0.844784	-1.04248
SPEF2	0.0495346	-0.9355	-1.04085
AC018868.2	0.0495346	-1.75749	-1.04076
NUDT21	0.0495346	-1.01299	-1.03981
LCORL	0.0495346	-0.957679	-1.03924
ENSG00000214982	0.12663	-0.829525	-1.03875
MPHOSPH9	0.0495346	-0.865534	-1.03729
FAM177B	0.12663	-1.19582	-1.03721
ENSG00000226419	0.0495346	-1.0416	-1.03519
HIVEP1	0.12663	-0.946341	-1.03431
UTP20	0.12663	-0.744212	-1.03423
INO80D	0.0495346	-1.04092	-1.03245
AC002546.1	0.0495346	-1.17243	-1.03138
HAUS6	0.0495346	-1.03258	-1.03111
HMGCS1	0.12663	-0.756597	-1.03097
PCBP1	0.0495346	-1.20924	-1.03093
NUP35	0.12663	-0.83658	-1.03082
ZBED4	0.12663	-0.702413	-1.03061
ENSG00000259768	0.12663	-0.914054	-1.03053
PAPOLG	0.0495346	-0.932737	-1.03001
GSK3B	0.0495346	-1.02982	-1.0299
BUB1B	0.0495346	-0.812736	-1.02868
ENSG00000222007	0.12663	-0.752821	-1.02856
PMEL	0.0495346	-1.14265	-1.02839
TSN	0.0495346	-0.824431	-1.02837
AC012213.3	0.0495346	-1.20844	-1.02803
EIF3J	0.0495346	-1.09894	-1.02802
ZNF682	0.12663	-0.696324	-1.02801
ENSG00000272947	0.0495346	-1.64137	-1.02718
ZNF112	0.0495346	-1.02272	-1.02641
PNISR	0.0495346	-0.93913	-1.02619
TAF4B	0.12663	-0.587577	-1.02579
TCERG1	0.0495346	-0.876499	-1.02489
RNF24	0.12663	-1.51144	-1.02479
MSI2	0.12663	-0.758326	-1.02478
UBN2	0.0495346	-0.957498	-1.02472
L2HGDH	0.12663	-0.816931	-1.02453
MMS22L	0.0495346	-1.0624	-1.02448
SELENOI	0.0495346	-0.887792	-1.02277
MINDY2	0.0495346	-1.14934	-1.02215
CEBPG	0.12663	-0.870567	-1.022
FGF7P8	0.121183	-1.01077	-1.01977
ZNF234	0.0495346	-1.1427	-1.01927
SERBP1	0.12663	-0.848841	-1.01883
DHX33	0.12663	-0.695223	-1.01877
WDR17	0.12663	-0.812286	-1.01781
SGCZ	0.0495346	-1.13857	-1.01676
USH2A	0.0495346	-0.943228	-1.01664
BCL2L11	0.0495346	-1.12361	-1.0165
SMC4	0.0495346	-1.01964	-1.01644
BAZ1A	0.0495346	-0.903548	-1.01514
ZNF780A	0.0495346	-0.876204	-1.01428
MED13	0.0495346	-0.843071	-1.01419
ENSG00000257621	0.0495346	-0.91738	-1.01376
CENPQ	0.0495346	-1.06634	-1.01314
ZNF468	0.0495346	-1.01483	-1.01313
COBLL1	0.0495346	-1.47354	-1.01245
RAB3IP	0.0495346	-1.12947	-1.01234
ENSG00000272402	0.12663	-0.634311	-1.01081
CEP85L	0.12663	-0.805498	-1.01077
SRPK1	0.0495346	-0.835107	-1.00953
CHAF1B	0.0495346	-1.11244	-1.00924
TROVE2	0.12663	-0.697522	-1.0087
TTBK2	0.0495346	-1.21245	-1.00762
QTRT2	0.12663	-0.782266	-1.0074
CSNK1G3	0.0495346	-0.955977	-1.00718
NDC80	0.0495346	-0.830485	-1.00684
AL591719.1	0.0495346	-0.817717	-1.00676
AHCTF1	0.0495346	-0.863992	-1.00675
TARS2	0.12663	-0.919262	-1.00653
ENSG00000229042	0.121335	-1.66439	-1.00583
ANKRD61	0.0495346	-1.46587	-1.00568
SEC63	0.0495346	-1.26654	-1.00559
MXI1	0.12663	-0.936185	-1.00545
ENAH	0.0495346	-1.0277	-1.00503
TRPM7	0.0495346	-0.920971	-1.00407
CTBP2	0.0495346	-0.968525	-1.00349
ENSG00000253284	0.12663	-0.829042	-1.00337
RRM2	0.0495346	-1.04163	-1.00113
ABCA11P	0.12663	-1.01533	-1.00077
ENSG00000222467	0.12663	-0.886657	-1.0004
TRIM13	0.0495346	-0.841083	-0.999741
ZNF485	0.12663	-0.67891	-0.999691
NETO2	0.12663	-0.788067	-0.998488
RGMB	0.0495346	-1.25599	-0.996789
PHF20	0.0495346	-1.11315	-0.995511
HNRNPD	0.0495346	-1.02463	-0.995469
DDX31	0.12663	-0.872021	-0.995296
PPID	0.12663	-0.824257	-0.994084
ENSG00000200360	0.121335	-1.8239	-0.993875
CBX3	0.12663	-0.843132	-0.992983
SUGT1	0.0495346	-0.896912	-0.992763
SGO1	0.0495346	-1.07251	-0.992314
AL359715.3	0.12663	-0.866282	-0.991353
ENSG00000271335	0.12663	-0.745658	-0.990664
SMG1	0.0495346	-1.09382	-0.990562
ZFP69B	0.0495346	-1.01015	-0.988976
ZNF749	0.0495346	-0.95737	-0.987845
TPX2	0.12663	-0.713055	-0.987633
ADAMTS1	0.12663	-0.849757	-0.986304
MRE11	0.0495346	-0.900092	-0.985881
ZNF827	0.0495346	-1.04951	-0.985492
UTP14C	0.12663	-1.04192	-0.984958
FKBP3	0.12663	-0.628981	-0.984104
TRMT13	0.0495346	-0.967937	-0.983462
RAPGEF6	0.0495346	-1.03807	-0.981785
VCPKMT	0.0495346	-0.968952	-0.981597
ENSG00000272565	0.0495346	-1.3072	-0.981314
LINC01030	0.121335	-1.49493	-0.980807
GTPBP8	0.0495346	-0.86085	-0.980469
EIF4EBP2	0.0495346	-1.02997	-0.980295
AC100814.1	0.0495346	-1.6642	-0.979949
MARCH6	0.0495346	-0.950786	-0.979907
CHKA	0.0495346	-0.83981	-0.978247
IPO11	0.0495346	-1.10825	-0.9778
CBR4	0.0495346	-1.07217	-0.976944
ENSG00000261496	0.0495346	-1.23327	-0.976098
ENSG00000266918	0.12663	-0.890536	-0.974897
KIAA1586	0.0495346	-0.827122	-0.974223
ARHGEF7	0.0495346	-1.13264	-0.973661
RANBP2	0.0495346	-0.804334	-0.971956
ENSG00000269825	0.0495346	-0.946045	-0.97067
ZNF546	0.0495346	-1.02287	-0.970393
NUFIP1	0.12663	-1.03731	-0.970272
N4BP2L2	0.0495346	-0.812206	-0.969738
ZBTB21	0.0495346	-1.02938	-0.969516
RUNDC1	0.0495346	-0.872097	-0.968041
AP4E1	0.0495346	-0.9984	-0.967975
ETNK1	0.0495346	-0.956771	-0.967501
AP002812.4	0.121335	-0.823879	-0.967297
SKA3	0.0495346	-0.781614	-0.96712
KIF2A	0.0495346	-0.878722	-0.966689
MAPK6	0.0495346	-0.896083	-0.965462
CSPP1	0.0495346	-0.829301	-0.96444
ZNF91	0.0495346	-0.957318	-0.964423
ZC3H13	0.0495346	-1.00846	-0.964158
MSH2	0.0495346	-0.825132	-0.963912
ZNF480	0.0495346	-1.00192	-0.963737
ATP1B1P1	0.0495346	-1.35158	-0.963668
TRNT1	0.0495346	-0.763308	-0.963407
ZFP37	0.0495346	-0.927482	-0.963283
SMNDC1	0.0495346	-0.905922	-0.962926
MLLT10	0.0495346	-0.73053	-0.961936
CREBZF	0.12663	-0.747354	-0.961877
AC093423.1	0.121335	-0.860796	-0.961701
CEP78	0.12663	-0.846622	-0.961176
ZNF107	0.0495346	-0.930674	-0.961072
MTHFD2L	0.0495346	-0.930025	-0.959972
ENSG00000200181	0.0495346	-1.07416	-0.958461
ENSG00000260125	0.121183	-1.57484	-0.958289
GOLGA8B	0.0495346	-1.18102	-0.957355
FEM1B	0.0495346	-0.837552	-0.957113
ZBTB33	0.0495346	-0.956943	-0.956847
KAT6B	0.0495346	-1.1177	-0.955775
ENSG00000272631	0.12663	-1.07272	-0.955749
PPTC7	0.0495346	-1.15017	-0.955451
BACH1	0.12663	-0.871873	-0.955306
SLC20A2	0.0495346	-0.793878	-0.954639
ZNF14	0.0495346	-0.895613	-0.95445
ENSG00000200674	0.0495346	-0.868891	-0.953626
ENSG00000141141	0.0495346	-0.871194	-0.953367
YEATS4	0.12663	-0.774845	-0.953277
AC087632.1	0.0495346	-0.821613	-0.952037
CEP95	0.12663	-0.619287	-0.951806
ASXL2	0.12663	-0.838115	-0.951514
AC098934.1	0.0495346	-0.874208	-0.950995
FBN2	0.12663	-0.770849	-0.950123
AKAP1	0.0495346	-0.834638	-0.948984
ZNF675	0.0495346	-1.23503	-0.948737
MRPS30	0.0495346	-0.786403	-0.947926
COPS2	0.0495346	-0.903849	-0.947401
CPEB2	0.12663	-0.823395	-0.947348
KIF27	0.12663	-0.715951	-0.946394
ENSG00000273311	0.12663	-1.05142	-0.946228
TIA1	0.0495346	-0.788071	-0.945845
HSPE1P25	0.121335	-1.37143	-0.945416
SON	0.12663	-0.75877	-0.941278
ZNF146	0.12663	-0.810553	-0.940821
CAMKMT	0.12663	-0.67424	-0.940362
AC091167.2	0.0495346	-0.871595	-0.940359
SH3GL1	0.0495346	-1.18853	-0.93982
GPR160	0.0495346	-1.1096	-0.938844
RBMX	0.12663	-0.734555	-0.938005
RNF111	0.0495346	-0.854892	-0.936719
CCNT2	0.0495346	-0.849709	-0.936712
PLCB1	0.0495346	-1.07962	-0.936384
MIS18A	0.0495346	-0.996985	-0.935689
RALGAPA2	0.0495346	-1.16667	-0.933603
UBA5	0.0495346	-0.933249	-0.932999
PTGES3	0.0495346	-0.987551	-0.932841
LEPROTL1	0.0495346	-0.993574	-0.931139
SLC39A6	0.0495346	-0.9171	-0.931138
RAD54B	0.0495346	-0.974906	-0.930544
RAD21	0.0495346	-0.916523	-0.928818
CEP135	0.0495346	-1.11372	-0.928694
SMC3	0.0495346	-1.01619	-0.928643
FAM76B	0.12663	-0.719684	-0.928473
RBM4	0.12663	-1.40918	-0.924306
MRPS10P1	0.036904	-1.23722	-0.92429
PAPD5	0.12663	-0.659253	-0.924098
PNPT1	0.12663	-0.685119	-0.923675
TMEM131L	0.0495346	-0.984387	-0.9231
NECAB1	0.0495346	-0.816956	-0.922339
RBM26	0.0495346	-0.871483	-0.921908
TARDBP	0.12663	-0.838952	-0.921614
NREP	0.0495346	-0.850429	-0.919837
RPL5P23	0.0495346	-0.937786	-0.919612
GPR135	0.12663	-0.748793	-0.919502
PSMA2	0.0495346	-0.834895	-0.918706
ZNF562	0.12663	-0.685691	-0.918686
GCFC2	0.12663	-0.700201	-0.917925
FAM98B	0.0495346	-1.06444	-0.916087
ENSG00000255310	0.0495346	-0.987057	-0.915951
RERE	0.0495346	-1.14586	-0.915827
ICE1	0.0495346	-0.983386	-0.915317
ZC2HC1A	0.0495346	-0.949723	-0.915082
CENPU	0.0495346	-0.819328	-0.914882
RFWD2	0.12663	-0.81162	-0.914537
NSD3	0.0495346	-0.789474	-0.914049
NARS2	0.12663	-0.691485	-0.91177
L3MBTL3	0.0495346	-0.796492	-0.91066
UBLCP1	0.0495346	-1.14939	-0.910437
LATS1	0.0495346	-1.06157	-0.90981
VMA21	0.0495346	-0.745133	-0.908684
FAM35A	0.0495346	-0.831296	-0.908633
CTC-462L7.1	0.0495346	-0.881287	-0.908587
HACD3	0.0495346	-0.93135	-0.907839
PANX1	0.0495346	-0.7615	-0.907631
AC068044.1	0.121335	-1.49418	-0.907517
DPPA2P1	0.121335	-0.851001	-0.907061
FUS	0.0495346	-0.896755	-0.906727
PSME4	0.0495346	-0.916545	-0.905269
KIN	0.0495346	-0.869336	-0.904906
HMGB3	0.0495346	-0.726226	-0.904452
ZNF154	0.0495346	-0.995378	-0.90374
CLHC1	0.0495346	-1.19278	-0.903457
UBXN2B	0.0495346	-1.13011	-0.903455
FBXO25	0.0495346	-0.852698	-0.902664
METTL8	0.12663	-0.735114	-0.902484
RALGAPB	0.0495346	-0.960208	-0.90219
LINC01415	0.0495346	-0.913574	-0.901466
SETD5	0.0495346	-0.78846	-0.900529
TEX30	0.12663	-0.665417	-0.899811
SRFBP1	0.0495346	-0.814795	-0.899442
ENSG00000260392	0.12663	-1.13786	-0.899423
PDS5B	0.0495346	-0.820512	-0.898713
TSPAN6	0.0495346	-0.698338	-0.898034
SNRPGP15	0.0495346	-1.3025	-0.897644
SAMHD1	0.0495346	-0.868823	-0.897436
NIPA1	0.0495346	-0.812549	-0.896216
MAGI3	0.12663	-0.670183	-0.895785
STK33	0.0495346	-0.936305	-0.895607
ZNF833P	0.121335	-0.919938	-0.894876
DCUN1D4	0.0495346	-0.88013	-0.894674
ZNF84	0.0495346	-0.793451	-0.894665
NAA15	0.0495346	-1.0442	-0.894598
ENSG00000261251	0.12663	-1.24661	-0.894405
RCN2	0.12663	-0.694372	-0.894155
ENSG00000180771	0.0495346	-1.31012	-0.893283
INTS10	0.12663	-0.579478	-0.892412
PPP2R2A	0.12663	-0.825093	-0.89217
ZBTB9	0.0495346	-1.30961	-0.891743
CRAMP1	0.0495346	-0.842887	-0.891535
ZNF24	0.0495346	-0.784781	-0.891529
SMARCA5	0.0495346	-0.864083	-0.891336
RWDD3	0.12663	-1.25972	-0.891034
FANCC	0.0495346	-0.815875	-0.890427
NSL1	0.12663	-0.718645	-0.889784
EPC1	0.0495346	-0.999115	-0.889583
FAM13A	0.12663	-0.624568	-0.888413
KIAA0586	0.0495346	-0.790539	-0.886661
ENSG00000236901	0.12663	-0.740514	-0.886591
AC020915.1	0.0495346	-0.895423	-0.883879
AC105254.1	0.121335	-1.63097	-0.88345
CSRNP3	0.12663	-1.15432	-0.882767
RSF1	0.0495346	-0.873907	-0.882445
MZF1	0.0495346	-1.15921	-0.881643
ACP1	0.12663	-0.63266	-0.880006
SPATA5L1	0.0495346	-1.12617	-0.87994
ZNF92	0.0495346	-0.730623	-0.879762
SOS1	0.0495346	-0.883042	-0.878455
H2AFY	0.12663	-0.584541	-0.878392
MKI67	0.12663	-0.771448	-0.878252
BAIAP2	0.0495346	-0.822089	-0.877741
RAB3B	0.12663	-0.756999	-0.876989
RIF1	0.0495346	-0.763524	-0.875641
CDR1	0.12663	-0.580097	-0.874971
ZFAND5	0.0495346	-0.781414	-0.874446
LSM14A	0.0495346	-0.795828	-0.872886
ENSG00000250295	0.12663	-0.967418	-0.872178
TRIM11	0.0495346	-0.958255	-0.872004
ENSG00000258829	0.121335	-0.858425	-0.871712
PANK1	0.0495346	-0.707202	-0.870607
RNMT	0.0495346	-0.93389	-0.870217
SMC5	0.0495346	-0.964012	-0.870028
RAB11FIP2	0.0495346	-0.931199	-0.869767
ENSG00000272604	0.0495346	-1.10385	-0.868107
CRNDE	0.0495346	-0.862172	-0.867434
NEBL	0.0495346	-1.10377	-0.866471
TTLL7	0.0495346	-0.884502	-0.865799
ATP5G2	0.12663	-0.698223	-0.865701
KIF20B	0.0495346	-0.915738	-0.863758
RPF1	0.12663	-0.677667	-0.863283
CNTLN	0.0495346	-0.755451	-0.863223
ENSG00000224358	0.12663	-0.667059	-0.862514
TBPL1	0.0495346	-0.885463	-0.861455
SAAL1	0.12663	-0.624941	-0.860748
GEN1	0.0495346	-0.804122	-0.860741
ZBTB24	0.12663	-0.562654	-0.860735
DDX46	0.12663	-0.752246	-0.860489
R3HDM2	0.0495346	-0.809768	-0.860107
ANP32A	0.12663	-0.695695	-0.859801
DEK	0.0495346	-0.746632	-0.859156
NUDCD1	0.0495346	-0.806576	-0.859016
ENSG00000258471	0.0495346	-0.822228	-0.858712
AC005261.2	0.0495346	-1.21769	-0.858272
ENSG00000206991	0.121335	-0.76974	-0.854985
CDCA7	0.12663	-0.747167	-0.854335
ENSG00000234650	0.12663	-0.620696	-0.8539
PSMA6	0.12663	-1.16795	-0.851813
MAD2L1	0.12663	-0.735942	-0.851727
RICTOR	0.0495346	-0.811003	-0.851718
SETMAR	0.0495346	-0.808577	-0.851658
PEG10	0.0495346	-0.822214	-0.851577
CEP290	0.0495346	-1.05845	-0.84887
PDK1	0.12663	-0.764784	-0.848354
NEAT1	0.12663	-0.776421	-0.84806
ZNF131	0.12663	-0.769383	-0.847898
INTS2	0.0495346	-0.779346	-0.8474
ZNF252P	0.0495346	-0.889514	-0.845988
NANOGP4	0.036904	-1.12863	-0.845296
UBE2Q2	0.12663	-0.700718	-0.843715
BLOC1S6	0.0495346	-0.78646	-0.843683
RBM25	0.0495346	-0.912974	-0.843646
TRIB2	0.0495346	-0.826989	-0.843331
RBAK	0.0495346	-0.857502	-0.8423
ENTPD7	0.0495346	-0.838011	-0.841763
ZNF175	0.0495346	-0.764848	-0.840718
PUS7L	0.0495346	-0.820063	-0.837943
UBE2K	0.0495346	-0.807748	-0.837653
ENSG00000260037	0.0495346	-1.48782	-0.837512
ENSG00000235954	0.12663	-1.03276	-0.837454
BZW1P2	0.12663	-1.07175	-0.835429
LRPPRC	0.12663	-0.644451	-0.835189
SDC2	0.12663	-0.691308	-0.834781
USP3	0.0495346	-0.702098	-0.833555
UTP18	0.12663	-0.591694	-0.832904
GTF2A2	0.0495346	-1.02218	-0.832687
TBC1D24	0.0495346	-0.878685	-0.82965
TP53BP1	0.0495346	-0.64124	-0.828824
MOCS3	0.12663	-1.1456	-0.828596
USP45	0.12663	-0.644312	-0.828336
ZNF681	0.12663	-0.788983	-0.828146
DHX36	0.0495346	-0.879459	-0.827954
THOC2	0.0495346	-0.751711	-0.825728
ENSG00000235706	0.12663	-0.913187	-0.825467
SNRPB	0.12663	-0.814841	-0.825421
TOPBP1	0.12663	-0.600999	-0.824422
MCM8	0.12663	-0.523842	-0.82435
SETD2	0.0495346	-0.868359	-0.823889
TBX3	0.12663	-0.696425	-0.823763
NUP58	0.0495346	-0.717078	-0.821939
PAPOLA	0.0495346	-0.765523	-0.821652
SYT11	0.0495346	-1.02553	-0.820963
PRPF40A	0.0495346	-0.806015	-0.820464
AC010306.1	0.0463016	-0.765436	-0.819105
MED17	0.0495346	-0.685898	-0.818387
SETP14	0.0495346	-0.897625	-0.818168
ENSG00000236896	0.12663	-0.469991	-0.817283
KLHL24	0.12663	-0.646326	-0.817006
PPP1R16B	0.12663	-1.04364	-0.816344
ASB3	0.0495346	-0.959192	-0.81608
IFT81	0.0495346	-0.727907	-0.81603
DIDO1	0.0495346	-0.831554	-0.815761
SMC6	0.0495346	-0.795735	-0.815337
ENSG00000232732	0.0495346	-1.38951	-0.815062
SLC25A24	0.0495346	-0.786976	-0.814561
UBE2V1	0.12663	-1.11019	-0.812887
LYRM7	0.0495346	-0.741504	-0.812626
RCOR3	0.12663	-0.698255	-0.811948
BCLAF1	0.0495346	-0.789973	-0.811932
TFCP2	0.0495346	-0.842537	-0.811468
SCAI	0.0495346	-0.949773	-0.811033
GINS1	0.12663	-0.409583	-0.81096
UTP15	0.12663	-0.621148	-0.810183
MSL2	0.12663	-0.7153	-0.810018
KIAA1524	0.12663	-0.695617	-0.809988
AC105402.1	0.121335	-0.973212	-0.807285
ENSG00000259659	0.0495346	-0.921386	-0.806273
CCDC65	0.0495346	-0.899292	-0.805699
RIOK1	0.0495346	-0.901056	-0.805306
ZNF592	0.0495346	-0.63397	-0.804111
PUM1	0.0495346	-0.780858	-0.803842
FOXJ3	0.0495346	-0.741003	-0.803425
PHF8	0.12663	-0.82912	-0.803094
ABCC4	0.12663	-0.650291	-0.802505
NFIB	0.12663	-0.596191	-0.801963
KLHL8	0.0495346	-0.66542	-0.800529
CLMN	0.0495346	-0.7828	-0.800487
MIR4735	0.12663	-0.467096	-0.799192
ENSG00000253352	0.0495346	-0.756028	-0.799038
ZUFSP	0.0495346	-0.788284	-0.798366
ZNF33B	0.12663	-0.716365	-0.798259
FTH1P4	0.036904	-1.15515	-0.797264
PALB2	0.12663	-0.666014	-0.796717
TTK	0.12663	-0.635013	-0.796526
IPO7	0.0495346	-0.969551	-0.796185
HNRNPKP3	0.12663	-0.82626	-0.795625
WDR48	0.12663	-0.755912	-0.794233
CNOT1	0.0495346	-0.775834	-0.793893
AKAP9	0.0495346	-0.912047	-0.793696
AC114878.1	0.0463016	-0.919302	-0.793574
CCDC58	0.0495346	-0.743451	-0.792492
GSPT1	0.0495346	-0.847499	-0.792489
PMS1	0.0495346	-0.776154	-0.792034
NKTR	0.0495346	-0.794526	-0.791727
ZWINT	0.12663	-0.675784	-0.7916
CEP41	0.0495346	-0.823337	-0.789365
VPS37A	0.0495346	-0.68224	-0.789302
CCNH	0.0495346	-0.71053	-0.78883
CSE1L	0.12663	-0.621447	-0.788588
AKIRIN2	0.0495346	-0.871145	-0.78834
SPICE1	0.0495346	-0.649929	-0.787604
PPP1R15B	0.12663	-0.600504	-0.787075
AL353791.1	0.12663	-0.7843	-0.784299
PBRM1	0.0495346	-0.91185	-0.784131
SFR1	0.0495346	-0.79251	-0.783507
SDHAF3	0.12663	-0.561975	-0.783423
SHOC2	0.12663	-0.753872	-0.782036
KIF3A	0.12663	-0.770809	-0.78196
FAM196A	0.12663	-1.22393	-0.781544
ENSG00000201012	0.036904	-0.749193	-0.780791
PDK2	0.0495346	-1.12288	-0.780437
NAB1	0.0495346	-0.804596	-0.779653
AC093871.1	0.121335	-1.31843	-0.778855
TMEM161B	0.0495346	-0.726556	-0.778188
DENND2D	0.12663	-0.659895	-0.77815
ENSG00000229692	0.0495346	-0.857048	-0.777823
CNOT6	0.0495346	-1.0018	-0.77767
ENSG00000199331	0.0495346	-0.918031	-0.776583
ZNF451	0.0495346	-0.683327	-0.775418
MRPL42	0.0495346	-0.708039	-0.774803
TSHZ3	0.0495346	-0.881498	-0.774288
CCDC171	0.12663	-0.846012	-0.773801
PUM2	0.0495346	-0.738719	-0.773353
SOX21	0.121335	-1.07929	-0.773158
AC007402.1	0.121183	-1.11473	-0.77279
MFSD14A	0.12663	-0.597325	-0.772337
ENSG00000227248	0.12663	-0.556032	-0.772217
C11orf95	0.0495346	-0.688267	-0.772155
TRMT10B	0.0495346	-1.19229	-0.771346
ENSG00000269728	0.0495346	-0.782667	-0.771329
BTG1	0.0495346	-0.758284	-0.770519
ZBTB6	0.0495346	-0.632657	-0.770189
WRN	0.0495346	-0.766837	-0.770096
SNRPF	0.12663	-0.801362	-0.769374
TRIM24	0.0495346	-0.73709	-0.769049
DYRK1A	0.12663	-0.654519	-0.768891
ENSG00000234233	0.121335	-0.714424	-0.768133
AC021483.1	0.121183	-0.786544	-0.766447
HAUS3	0.12663	-0.608732	-0.763922
RBBP9	0.0495346	-0.945049	-0.763319
THAP2	0.12663	-0.700352	-0.762949
PRR14L	0.12663	-0.784187	-0.761817
PDP2	0.0495346	-0.916348	-0.761801
ZFP82	0.0495346	-1.0062	-0.761678
ZNF302	0.12663	-0.70094	-0.760051
ARID4B	0.0495346	-0.79529	-0.759839
ZNF790	0.0495346	-0.818444	-0.758764
DPYSL4	0.12663	-0.601738	-0.75867
ENSG00000238775	0.12663	-0.837164	-0.758112
ZNF254	0.0495346	-0.707017	-0.757549
RBM19	0.12663	-0.626362	-0.757341
NUS1	0.12663	-0.663167	-0.756639
UGT8	0.12663	-0.558989	-0.756448
UBTD2	0.0495346	-0.727163	-0.755369
KIAA0232	0.0495346	-0.757528	-0.754978
HMGB1P14	0.0495346	-1.13511	-0.753938
ANKRD17	0.0495346	-0.648998	-0.753744
TOP2A	0.0495346	-0.704494	-0.752992
SLC30A7	0.0495346	-0.725008	-0.752882
C2orf69	0.0495346	-0.77796	-0.752313
CLASP1	0.0495346	-0.68627	-0.751972
PM20D2	0.12663	-0.566744	-0.751734
LINC02035	0.0495346	-1.13614	-0.750859
POLR2M	0.0495346	-0.712734	-0.750713
HAUS2	0.0495346	-0.840072	-0.750374
RBM12	0.0495346	-0.669203	-0.74864
DMTF1	0.0495346	-0.70729	-0.748575
OSTCP2	0.036904	-0.910891	-0.748492
TLNRD1	0.12663	-0.67913	-0.748221
ZNF100	0.0495346	-0.654994	-0.747845
SECISBP2	0.0495346	-0.622102	-0.747368
ZMYM2	0.0495346	-0.800631	-0.747145
DIMT1	0.0495346	-0.662383	-0.746994
R3HCC1L	0.0495346	-0.916105	-0.746552
MPP6	0.12663	-0.700751	-0.74642
EFCAB7	0.0495346	-0.734402	-0.746349
YEATS2	0.0495346	-0.608101	-0.746087
ENSG00000207442	0.12663	-0.520462	-0.746034
C9orf40	0.12663	-0.762225	-0.744995
CENPC	0.0495346	-0.677623	-0.744971
NUFIP2	0.0495346	-0.687323	-0.744967
ZNF736	0.12663	-1.11995	-0.744241
RAD54L2	0.12663	-0.458566	-0.743194
C16orf87	0.12663	-0.738907	-0.74311
ENSG00000267080	0.12663	-0.556771	-0.742014
PARP11	0.0495346	-0.871713	-0.741933
LEO1	0.12663	-0.629988	-0.741157
TCP11	0.12663	-0.843812	-0.741142
DEPDC1	0.12663	-0.605077	-0.738696
RSRC2	0.0495346	-0.697226	-0.738564
TPP2	0.12663	-0.548732	-0.738414
FAM169A	0.12663	-0.625528	-0.738077
ENSG00000229729	0.0495346	-1.29901	-0.737605
TRIP4	0.12663	-0.871713	-0.737029
TANC1	0.0495346	-0.915876	-0.736324
ENSG00000262732	0.12663	-0.626129	-0.736316
ATP6V1G1	0.0495346	-0.673337	-0.736202
BTG3	0.12663	-0.62215	-0.735227
PRTFDC1	0.12663	-0.564736	-0.734895
SREK1IP1	0.0495346	-0.719787	-0.73408
ENY2	0.0495346	-0.690696	-0.733412
CYCS	0.12663	-0.529784	-0.733372
XPO1	0.0495346	-0.803505	-0.733318
MND1	0.0495346	-0.671191	-0.732404
ZNF197	0.12663	-0.586932	-0.731665
CRTC3	0.0495346	-1.23566	-0.730721
FCF1P2	0.0495346	-0.842977	-0.73067
NUP153	0.12663	-0.608744	-0.73007
RIOK2	0.12663	-0.634598	-0.728843
SQLE	0.0495346	-0.712176	-0.728207
PKN2	0.0495346	-0.763137	-0.728165
LONRF1	0.0495346	-0.761677	-0.728011
PIAS2	0.0495346	-0.760738	-0.727873
ZNF300	0.0495346	-1.05106	-0.727768
RBBP8	0.0495346	-0.808157	-0.726254
AC138832.1	0.12663	-1.1174	-0.726073
LARP4B	0.0495346	-0.692463	-0.725918
LINC00989	0.0495346	-0.740497	-0.725754
CCDC82	0.0495346	-0.935683	-0.724878
ENSG00000253738	0.0495346	-0.728427	-0.724229
RPRD1B	0.0495346	-0.694497	-0.72376
CACNA2D1	0.0495346	-0.748017	-0.723368
MDM2	0.12663	-0.589307	-0.723332
ERI1	0.12663	-0.966402	-0.723323
DHX40	0.12663	-0.564351	-0.722089
CCDC6	0.0495346	-0.680281	-0.721434
ADAM23	0.0495346	-0.749442	-0.721211
PIK3C3	0.12663	-0.502983	-0.720941
IER3IP1	0.0495346	-0.645695	-0.720346
TRMT5	0.12663	-0.666442	-0.71976
KIAA1841	0.0495346	-0.613732	-0.719416
NUP160	0.0495346	-0.576517	-0.718962
MATR3	0.12663	-0.543997	-0.718602
MALAT1	0.0495346	-0.625507	-0.718379
TLK1	0.0495346	-0.693197	-0.717931
UBAP2	0.12663	-0.592404	-0.717453
RPIA	0.12663	-0.64111	-0.717076
CCAR1	0.0495346	-0.818052	-0.716131
HNRNPU	0.12663	-0.647495	-0.71612
UBR1	0.0495346	-0.791979	-0.715253
LIN54	0.0495346	-0.805974	-0.714275
SSR3	0.12663	-0.598876	-0.713916
PMS2CL	0.12663	-0.496839	-0.71376
SCAF11	0.0495346	-0.854027	-0.713048
ENSG00000270072	0.0463016	-1.22473	-0.712988
ZNF587B	0.12663	-0.778992	-0.712845
SMAD4	0.0495346	-0.765104	-0.711806
ZNF605	0.12663	-0.634882	-0.711526
GTF2A1	0.0495346	-0.720641	-0.711342
PNMA1	0.0495346	-0.750656	-0.710858
GPATCH2L	0.0495346	-0.668327	-0.71016
PCNA	0.12663	-0.617824	-0.70996
UHRF1BP1	0.0495346	-0.840329	-0.70911
NIPBL	0.0495346	-0.792128	-0.709019
ENSG00000155640	0.12663	-0.600699	-0.708716
METTL25	0.12663	-0.9337	-0.708333
ANGEL2	0.0495346	-0.700849	-0.706411
MTRNR2L2	0.0495346	-1.14911	-0.705775
NFE2L2	0.0495346	-0.626058	-0.705079
LRCH3	0.0495346	-0.561161	-0.704436
KCNK1	0.0495346	-0.927619	-0.702415
ABI2	0.12663	-0.549658	-0.70218
ENSG00000268913	0.0495346	-0.638371	-0.702067
RBFA	0.12663	-0.751088	-0.700576
PIGC	0.12663	-0.801279	-0.700529
C5orf34	0.12663	-0.542539	-0.699578
PAK2	0.12663	-0.606138	-0.699548
BX004987.1	0.121183	-0.607387	-0.69707
SUCO	0.0495346	-0.778201	-0.696896
MORC3	0.0495346	-0.710855	-0.69688
ROBO2	0.12663	-0.734543	-0.696463
RBBP4	0.0495346	-0.632742	-0.696102
SMIM13	0.12663	-0.538666	-0.69608
SDE2	0.0495346	-0.667045	-0.69582
GCLC	0.0495346	-0.693231	-0.695628
AC011196.1	0.12663	-0.482848	-0.695388
TM2D3	0.12663	-0.889543	-0.69524
PABPC1L	0.12663	-0.475174	-0.692945
TFRC	0.12663	-0.625865	-0.692542
SREK1	0.0495346	-0.65352	-0.691792
DENND4A	0.0495346	-0.805813	-0.691625
FAM216A	0.12663	-0.55218	-0.691607
RASA2	0.0495346	-0.71108	-0.690921
CDC73	0.0495346	-0.727204	-0.690465
AC007842.1	0.0495346	-0.637852	-0.690181
KLHL13	0.0495346	-0.694895	-0.690137
AC002546.2	0.0463016	-0.944897	-0.689651
CDK1	0.0495346	-0.623312	-0.689188
GPBP1	0.0495346	-0.612591	-0.688918
TRA2B	0.12663	-0.539441	-0.688757
ENSG00000252459	0.121335	-1.34001	-0.688264
SLC39A10	0.12663	-0.584414	-0.687731
VPS36	0.0495346	-0.663106	-0.687492
NCAPG	0.0495346	-0.638329	-0.68742
KIF23	0.0495346	-0.609668	-0.686228
PSIP1	0.0495346	-0.649205	-0.686151
EPC2	0.12663	-0.601142	-0.685798
JADE1	0.12663	-0.578131	-0.68578
ZNF10	0.12663	-0.621499	-0.682935
TERF1	0.0495346	-0.842704	-0.682816
DSN1	0.12663	-0.717156	-0.681744
ZDHHC17	0.12663	-0.596383	-0.681426
COA1	0.12663	-0.577596	-0.679852
SPAST	0.0495346	-0.65749	-0.679812
AC006504.3	0.12663	-0.923342	-0.679141
ARMC8	0.12663	-0.510698	-0.678785
SYNCRIP	0.0495346	-0.661705	-0.678431
C5orf51	0.0495346	-0.734727	-0.678229
RPSAP16	0.12663	-0.544818	-0.676958
ZNF184	0.0495346	-0.680195	-0.674893
POGLUT1	0.0495346	-0.627677	-0.674196
ATRIP	0.12663	-1.10676	-0.673862
EIF1B	0.0495346	-0.772738	-0.673014
RRN3	0.12663	-0.507457	-0.673009
NRAS	0.12663	-0.50731	-0.672439
NOL11	0.12663	-0.441798	-0.672362
AL512326.1	0.12663	-0.619501	-0.672251
FMR1	0.0495346	-0.583313	-0.671813
TFAP2A	0.0495346	-0.93885	-0.671096
C5orf24	0.0495346	-0.79694	-0.670938
ENSG00000244513	0.0495346	-0.687435	-0.670514
COIL	0.12663	-0.569721	-0.670157
KIF11	0.0495346	-0.835264	-0.668962
SKIV2L2	0.12663	-0.591087	-0.668586
KLHL3	0.12663	-1.06627	-0.668345
AGFG1	0.0495346	-0.638172	-0.66788
MEIOC	0.0495346	-1.14035	-0.667221
MIR4766	0.121335	-0.661772	-0.666901
AP004242.1	0.0463016	-0.615894	-0.666485
ALG6	0.0495346	-0.722011	-0.665147
FNDC3A	0.0495346	-0.705967	-0.664002
KCTD3	0.12663	-0.545042	-0.662483
ARGLU1	0.0495346	-0.65057	-0.661371
SKA2	0.0495346	-0.679685	-0.661213
CCDC84	0.12663	-0.817631	-0.659567
MIR618	0.121183	-0.600244	-0.658985
UBE2E3	0.0495346	-0.696563	-0.658958
TTC14	0.12663	-0.629705	-0.658169
ENSG00000260244	0.12663	-0.852372	-0.657558
BRWD3	0.12663	-0.530269	-0.657557
HERC2P8	0.0495346	-0.959717	-0.657144
SIX4	0.12663	-0.862965	-0.656756
HNRNPUL1	0.12663	-0.559509	-0.65563
CDKN2AIP	0.0495346	-0.55551	-0.655209
DPH3	0.0495346	-0.803997	-0.654763
ZNF529	0.12663	-0.492384	-0.654729
LARP1B	0.0495346	-0.554448	-0.653953
SRP9	0.0495346	-0.757806	-0.653318
KNL1	0.0495346	-0.642088	-0.652615
GNB4	0.12663	-0.635126	-0.652603
ZNF706	0.0495346	-0.865454	-0.649221
MYCT1	0.121183	-0.613965	-0.647936
FAM200B	0.12663	-0.512333	-0.647814
AFF4	0.0495346	-0.654999	-0.64739
ENSG00000239067	0.121335	-1.20245	-0.646858
OTUD4	0.0495346	-0.656039	-0.646435
RBM39	0.0495346	-0.661846	-0.646094
JMJD1C	0.0495346	-0.528159	-0.645795
ZCCHC8	0.0495346	-0.644161	-0.645746
ELMOD2	0.0495346	-0.69024	-0.645449
TFAM	0.12663	-0.566112	-0.645431
ENSG00000204177	0.0495346	-0.597254	-0.643323
ZNF621	0.12663	-0.598092	-0.641818
PDE12	0.0495346	-0.957534	-0.641733
DIXDC1	0.12663	-0.508737	-0.641
PEAK1	0.0495346	-0.719478	-0.640642
CAMSAP2	0.0495346	-0.679833	-0.640103
TYW5	0.0495346	-0.718752	-0.640031
COX10	0.12663	-0.538787	-0.638915
DERL2	0.0495346	-0.569689	-0.637805
DIP2B	0.0495346	-0.537859	-0.637702
AC090607.2	0.0495346	-0.766136	-0.637386
TMEM67	0.0495346	-0.598678	-0.636856
GCLM	0.12663	-0.656634	-0.636723
ING1	0.0495346	-0.917905	-0.635954
HELZ	0.0495346	-0.6484	-0.635564
ZNF26	0.0495346	-0.579444	-0.635501
STS	0.0495346	-0.777082	-0.635432
UBE3A	0.12663	-0.517696	-0.634918
TAMM41	0.0495346	-0.648291	-0.634741
WAC	0.12663	-0.490117	-0.634671
RPL34-AS1	0.0495346	-0.595859	-0.634308
GIN1	0.0495346	-0.696591	-0.633617
AC105339.3	0.0495346	-0.726416	-0.633333
PRRC2B	0.0495346	-0.611954	-0.632017
MIR591	0.0463016	-0.655369	-0.631316
TFB2M	0.0495346	-0.88721	-0.630734
PIK3C2A	0.0495346	-0.724485	-0.630087
MARCH7	0.0495346	-0.572324	-0.629848
ZNF271P	0.12663	-0.500936	-0.6294
NASP	0.12663	-0.530173	-0.629044
MSH3	0.12663	-0.66265	-0.628821
CHSY1	0.0495346	-0.572892	-0.627812
DPYSL2	0.0495346	-0.577925	-0.627625
TBRG4	0.12663	-1.13282	-0.627493
MAGEF1	0.12663	-0.476835	-0.627394
AC100854.1	0.12663	-0.922998	-0.626576
ENSG00000270101	0.0495346	-0.727039	-0.626493
PCBP2	0.12663	-0.531295	-0.626243
SUZ12	0.0495346	-0.649016	-0.6258
[truncated: 4,472 more rows]

## Sheet: SOX11-KD GSEA (MSigDB)
NAME OF GENE SET	GENE SET SIZE	Normalized Enrichment Score (NES)	Nominal p-value	FDR-adjusted p-value (q-value)	TYPE OF ENRICHMENT
VERHAAK_GLIOBLASTOMA_PRONEURAL	48	-2.94212	0	0	neg		q-values < 0,05
PYEON_CANCER_HEAD_AND_NECK_VS_CERVICAL_UP	69	-2.7217	0	0	neg
MIKKELSEN_MEF_HCP_WITH_H3K27ME3	25	-2.64595	0	0	neg
FISCHER_DREAM_TARGETS	227	-2.60552	0	0	neg
FLORIO_NEOCORTEX_BASAL_RADIAL_GLIA_DN	42	-2.54968	0	0	neg
MARTORIATI_MDM4_TARGETS_NEUROEPITHELIUM_DN	33	-2.38527	0	0.00287779	neg
KRAS.300_UP.V1_UP	26	-2.37754	0	0.00271454	neg
PUJANA_XPRSS_INT_NETWORK	44	-2.35249	0	0.00316419	neg
WHITFIELD_CELL_CYCLE_S	47	-2.34313	0	0.00332514	neg
GO_SYNAPTIC_MEMBRANE	63	-2.262	0	0.00828563	neg
GO_POSTSYNAPTIC_MEMBRANE	46	-2.25758	0	0.00800563	neg
CHR15Q21	30	-2.24421	0	0.00834738	neg
HALLMARK_E2F_TARGETS	49	-2.22274	0	0.010809	neg
E2F3_UP.V1_UP	35	-2.19521	0	0.0144346	neg
CHR19P12	17	-2.19482	0	0.0135861	neg
CHR1P22	15	-2.19109	0	0.0132777	neg
ODONNELL_TFRC_TARGETS_DN	37	-2.1901	0	0.0125643	neg
BENPORATH_ES_1	69	-2.18614	0	0.0125383	neg
OCT1_06	51	-2.182	0	0.0126047	neg
GSE9946_LISTERIA_INF_MATURE_VS_PROSTAGLANDINE2_TREATED_MATURE_DC_DN	18	-2.17755	0	0.012665	neg
OCT_C	36	-2.1678	0	0.0134346	neg
GNF2_RRM1	21	-2.16325	0	0.0135034	neg
GO_HEART_PROCESS	25	-2.16101	0	0.0131895	neg
GSE40274_FOXP3_VS_FOXP3_AND_HELIOS_TRANSDUCED_ACTIVATED_CD4_TCELL_DN	28	-2.16068	0	0.012711	neg
GO_TUBULIN_BINDING	66	-2.15552	0	0.0129865	neg
GSE5099_CLASSICAL_M1_VS_ALTERNATIVE_M2_MACROPHAGE_DN	38	-2.13647	0	0.0158125	neg
AGTCTTA_MIR499	20	-2.11581	0.00198807	0.0190258	neg
KRAS.600_UP.V1_UP	39	-2.11551	0	0.0184084	neg
HALLMARK_G2M_CHECKPOINT	43	-2.1077	0	0.0194434	neg
GO_PASSIVE_TRANSMEMBRANE_TRANSPORTER_ACTIVITY	44	-2.10396	0	0.0193905	neg
ATGCAGT_MIR217	30	-2.09948	0	0.0198631	neg
GO_MRNA_TRANSPORT	32	-2.08293	0	0.0234898	neg
GNF2_PCNA	18	-2.07961	0	0.0235118	neg
FERREIRA_EWINGS_SARCOMA_UNSTABLE_VS_STABLE_UP	52	-2.07313	0	0.0245643	neg
PUJANA_BRCA2_PCC_NETWORK	96	-2.06277	0	0.0267928	neg
GO_REGULATION_OF_CATION_CHANNEL_ACTIVITY	19	-2.06127	0.00189036	0.0266416	neg
PUJANA_BRCA_CENTERED_NETWORK	31	-2.05618	0	0.0273252	neg
KRAS.KIDNEY_UP.V1_UP	25	-2.05565	0	0.0267881	neg
BIDUS_METASTASIS_UP	50	-2.05467	0	0.0263374	neg
GO_DNA_REPLICATION	57	-2.05245	0	0.0262857	neg
CUI_TCF21_TARGETS_2_UP	69	-2.04922	0	0.026517	neg
SOX5_01	45	-2.04844	0	0.0261458	neg
GO_CATION_CHANNEL_ACTIVITY	33	-2.04182	0	0.0275065	neg
GNF2_SMC4L1	21	-2.03941	0.00398406	0.027551	neg
ROSTY_CERVICAL_CANCER_PROLIFERATION_CLUSTER	31	-2.03611	0	0.0281409	neg
DAZARD_RESPONSE_TO_UV_NHEK_DN	97	-2.02546	0	0.0309128	neg
BENPORATH_PROLIFERATION	30	-2.02283	0	0.0311856	neg
GRAHAM_NORMAL_QUIESCENT_VS_NORMAL_DIVIDING_DN	17	-2.02252	0	0.0306317	neg
CREBP1_01	30	-2.02156	0	0.030347	neg
MIKKELSEN_MCV6_HCP_WITH_H3K27ME3	20	-2.01786	0	0.0309035	neg
GO_PEPTIDE_N_ACETYLTRANSFERASE_ACTIVITY	16	-2.01619	0	0.0308851	neg
POU1F1_Q6	34	-2.01267	0	0.0313664	neg
OCT1_B	34	-2.01184	0	0.031068	neg
GO_CHROMOSOME_SEGREGATION	73	-1.98822	0	0.0390902	neg
GO_NUCLEAR_CHROMOSOME_SEGREGATION	56	-1.98807	0	0.0384318	neg
CEBP_Q3	43	-1.98753	0.00201613	0.0379823	neg
ZHOU_CELL_CYCLE_GENES_IN_IR_RESPONSE_6HR	17	-1.98245	0.00397614	0.0395709	neg
PRC1_BMI_UP.V1_DN	16	-1.98228	0.00207039	0.0389481	neg
GACTGTT_MIR212_MIR132	40	-1.97987	0.00588235	0.0393419	neg
GSE5099_DAY3_VS_DAY7_MCSF_TREATED_MACROPHAGE_DN	37	-1.97917	0	0.0389548	neg
KOBAYASHI_EGFR_SIGNALING_24HR_DN	49	-1.97843	0.00206612	0.0387131	neg
GTACTGT_MIR101	53	-1.97826	0	0.0381352	neg
DUTERTRE_ESTRADIOL_RESPONSE_24HR_UP	66	-1.97654	0	0.0381606	neg
GO_SYNAPTIC_VESICLE_LOCALIZATION	33	-1.97549	0	0.0379063	neg
VILLANUEVA_LIVER_CANCER_KRT19_UP	45	-1.97406	0	0.0379247	neg
GSE6681_DELETED_FOXP3_VS_WT_TREG_UP	21	-1.9732	0	0.0377428	neg
GO_TRANSPORTER_COMPLEX	34	-1.97308	0.00399202	0.0372134	neg
BROWNE_HCMV_INFECTION_48HR_UP	37	-1.97266	0	0.0368184	neg
GO_INTRINSIC_COMPONENT_OF_SYNAPTIC_MEMBRANE	20	-1.9693	0.00197628	0.0375031	neg
GO_INTRINSIC_COMPONENT_OF_POSTSYNAPTIC_MEMBRANE	16	-1.96803	0	0.0374524	neg
GO_GATED_CHANNEL_ACTIVITY	34	-1.9649	0.00203666	0.0380107	neg
HADDAD_B_LYMPHOCYTE_PROGENITOR	51	-1.96126	0	0.0390765	neg
GO_MRNA_3_END_PROCESSING	17	-1.95754	0.00199601	0.0401998	neg
HOELZEL_NF1_TARGETS_DN	15	-1.94869	0.00192308	0.0435242	neg
KINSEY_TARGETS_OF_EWSR1_FLII_FUSION_UP	294	-1.9484	0	0.0430891	neg
ACTGAAA_MIR30A3P_MIR30E3P	46	-1.94467	0	0.0442652	neg
GSE22443_IL2_VS_IL12_TREATED_ACT_CD8_TCELL_UP	26	-1.9436	0	0.0442218	neg
KRAS.600.LUNG.BREAST_UP.V1_UP	21	-1.94328	0.00207039	0.0438467	neg
GSE22611_NOD2_TRANSD_VS_CTRL_TRANSD_HEK293_MDP_STIM_2H_DN	15	-1.94225	0.00199601	0.0437003	neg
TCCATTKW_UNKNOWN	59	-1.93782	0	0.0448981	neg
GNF2_CENPF	18	-1.93739	0.00576923	0.0445927	neg
GSE7218_UNSTIM_VS_ANTIGEN_STIM_THROUGH_IGM_BCELL_DN	25	-1.93581	0.00193424	0.0446739	neg
GSE30083_SP3_VS_SP4_THYMOCYTE_UP	29	-1.92439	0.00198413	0.0492154	neg
GO_PRESYNAPTIC_MEMBRANE	25	-1.92234	0.0039604	0.0498706	neg
REN_ALVEOLAR_RHABDOMYOSARCOMA_DN	87	3.70225	0	0	pos
CHARAFE_BREAST_CANCER_LUMINAL_VS_MESENCHYMAL_DN	98	3.15009	0	0	pos
CHARAFE_BREAST_CANCER_LUMINAL_VS_BASAL_DN	83	3.1102	0	0	pos
HSIAO_HOUSEKEEPING_GENES	117	2.96769	0	0	pos
VERHAAK_GLIOBLASTOMA_MESENCHYMAL	25	2.9536	0	0	pos
JOHNSTONE_PARVB_TARGETS_3_UP	74	2.93943	0	0	pos
MORF_NME2	51	2.88736	0	0	pos
DAVICIONI_MOLECULAR_ARMS_VS_ERMS_DN	29	2.87564	0	0	pos
MORF_ACTG1	51	2.8546	0	0	pos
HUANG_DASATINIB_RESISTANCE_UP	19	2.82048	0	0	pos
GSE29618_BCELL_VS_MDC_DN	43	2.80506	0	0	pos
GSE42021_CD24HI_VS_CD24INT_TREG_THYMUS_DN	37	2.80134	0	0	pos
GSE2405_0H_VS_9H_A_PHAGOCYTOPHILUM_STIM_NEUTROPHIL_DN	63	2.77014	0	0	pos
MORF_NPM1	60	2.76337	0	0	pos
GSE21546_WT_VS_SAP1A_KO_DP_THYMOCYTES_UP	33	2.76221	0	0	pos
GSE3982_DC_VS_CENT_MEMORY_CD4_TCELL_UP	40	2.72641	0	0	pos
GSE2405_0H_VS_24H_A_PHAGOCYTOPHILUM_STIM_NEUTROPHIL_UP	59	2.70414	0	0	pos
NABA_MATRISOME_ASSOCIATED	51	2.69522	0	0	pos
REACTOME_SRP_DEPENDENT_COTRANSLATIONAL_PROTEIN_TARGETING_TO_MEMBRANE	47	2.69103	0	0	pos
PECE_MAMMARY_STEM_CELL_UP	40	2.68988	0	0	pos
GSE42021_TREG_VS_TCONV_PLN_UP	39	2.6768	0	0	pos
REACTOME_EUKARYOTIC_TRANSLATION_INITIATION	50	2.67559	0	0	pos
BMI1_DN.V1_UP	19	2.67035	0	0	pos
MODULE_151	87	2.6679	0	0	pos
REACTOME_RRNA_PROCESSING	50	2.66563	0	0	pos
KEGG_RIBOSOME	36	2.66081	0	0	pos
GSE9509_10MIN_VS_30MIN_LPS_STIM_IL10_KO_MACROPHAGE_UP	34	2.64925	0	0	pos
REACTOME_SELENOAMINO_ACID_METABOLISM	42	2.64545	0	0	pos
MODULE_114	95	2.64258	0	0	pos
GO_CELL_SUBSTRATE_JUNCTION	76	2.64202	0	0	pos
REACTOME_TRANSLATION	91	2.63858	0	4.6693e-05	pos
GSE26030_TH1_VS_TH17_RESTIMULATED_DAY15_POST_POLARIZATION_DN	40	2.63656	0	4.52339e-05	pos
GO_VESICLE_LUMEN	55	2.63565	0	4.38631e-05	pos
CHEN_METABOLIC_SYNDROM_NETWORK	175	2.63546	0	4.2573e-05	pos
RODWELL_AGING_KIDNEY_NO_BLOOD_UP	41	2.62735	0	4.13567e-05	pos
GSE3982_DC_VS_EFF_MEMORY_CD4_TCELL_UP	40	2.61721	0	4.02079e-05	pos
MORF_TPT1	42	2.61262	0	3.91212e-05	pos
REACTOME_NONSENSE_MEDIATED_DECAY_NMD_INDEPENDENT_OF_THE_EXON_JUNCTION_COMPLEX_EJC	39	2.60864	0	3.80917e-05	pos
NABA_MATRISOME	77	2.60587	0	3.7115e-05	pos
GSE12845_IGD_NEG_BLOOD_VS_DARKZONE_GC_TONSIL_BCELL_UP	40	2.60575	0	3.61871e-05	pos
RAF_UP.V1_UP	37	2.60215	0	3.53045e-05	pos
REACTOME_NEUTROPHIL_DEGRANULATION	72	2.59802	0	3.44639e-05	pos
BHATI_G2M_ARREST_BY_2METHOXYESTRADIOL_DN	28	2.58575	0	3.36624e-05	pos
GSE5679_CTRL_VS_PPARG_LIGAND_ROSIGLITAZONE_AND_RARA_AGONIST_AM580_TREATED_DC_DN	39	2.57689	0	3.28974e-05	pos
JISON_SICKLE_CELL_DISEASE_UP	34	2.57629	0	3.21663e-05	pos
MORF_AP2M1	52	2.57457	0	3.1467e-05	pos
NUYTTEN_EZH2_TARGETS_UP	192	2.57218	0	3.07975e-05	pos
GO_MYELOID_LEUKOCYTE_MEDIATED_IMMUNITY	80	2.568	0	3.01559e-05	pos
MODULE_83	103	2.56714	0	2.95405e-05	pos
CHR1P36	51	2.56566	0	2.89497e-05	pos
GSE24634_TEFF_VS_TCONV_DAY7_IN_CULTURE_DN	46	2.5652	0	2.8382e-05	pos
REACTOME_RRNA_PROCESSING_IN_THE_NUCLEUS_AND_CYTOSOL	48	2.56353	0	2.78362e-05	pos
GSE18893_TCONV_VS_TREG_24H_CULTURE_UP	30	2.56166	0	2.7311e-05	pos
GSE42021_TCONV_PLN_VS_CD24HI_TCONV_THYMUS_DN	33	2.56015	0	2.68053e-05	pos
GSE29618_MONOCYTE_VS_PDC_UP	28	2.55987	0	2.63179e-05	pos
GSE42021_TREG_PLN_VS_CD24INT_TREG_THYMUS_DN	45	2.55591	0	2.58479e-05	pos
GO_WOUND_HEALING	61	2.5534	0	2.53944e-05	pos
GO_PROTEIN_LOCALIZATION_TO_ENDOPLASMIC_RETICULUM	46	2.5519	0	2.49566e-05	pos
GSE3039_ALPHAALPHA_VS_ALPHABETA_CD8_TCELL_UP	32	2.55087	0	2.45336e-05	pos
GSE42021_TREG_PLN_VS_TREG_PRECURSORS_THYMUS_DN	38	2.54236	0	2.41247e-05	pos
GO_PROTEIN_TARGETING	101	2.5423	0	2.37292e-05	pos
MEL18_DN.V1_UP	20	2.53489	0	2.33465e-05	pos
SCHUETZ_BREAST_CANCER_DUCTAL_INVASIVE_UP	40	2.52938	0	2.29759e-05	pos
GSE10325_LUPUS_BCELL_VS_LUPUS_MYELOID_DN	35	2.52882	0	2.26169e-05	pos
GO_ESTABLISHMENT_OF_PROTEIN_LOCALIZATION_TO_ENDOPLASMIC_RETICULUM	42	2.52671	0	2.2269e-05	pos
GO_ANCHORING_JUNCTION	100	2.51499	0	2.19316e-05	pos
GSE29618_BCELL_VS_MDC_DAY7_FLU_VACCINE_DN	43	2.51469	0	2.16042e-05	pos
GO_COTRANSLATIONAL_PROTEIN_TARGETING_TO_MEMBRANE	40	2.51374	0	2.12865e-05	pos
GO_AZUROPHIL_GRANULE	30	2.50866	0	2.0978e-05	pos
REACTOME_REGULATION_OF_EXPRESSION_OF_SLITS_AND_ROBOS	57	2.50689	0	2.06783e-05	pos
RODWELL_AGING_KIDNEY_UP	69	2.50199	0	2.03871e-05	pos
GO_MYELOID_LEUKOCYTE_ACTIVATION	86	2.50036	0	2.01039e-05	pos
SANSOM_APC_TARGETS_DN	43	2.49965	0	1.98285e-05	pos
GO_RIBOSOMAL_SUBUNIT	58	2.49579	0	1.95606e-05	pos
GSE29618_BCELL_VS_PDC_DN	33	2.4947	0	1.92998e-05	pos
GSE360_HIGH_DOSE_B_MALAYI_VS_M_TUBERCULOSIS_MAC_UP	42	2.49011	0	1.90458e-05	pos
GSE37533_PPARG2_FOXP3_VS_FOXP3_TRANSDUCED_CD4_TCELL_DN	44	2.4901	0	1.87985e-05	pos
GO_STRUCTURAL_CONSTITUENT_OF_RIBOSOME	52	2.48636	0	1.85575e-05	pos
GSE42021_CD24HI_VS_CD24LOW_TCONV_THYMUS_DN	41	2.48611	0	1.83226e-05	pos
GSE21546_SAP1A_KO_VS_SAP1A_KO_AND_ELK1_KO_ANTI_CD3_STIM_DP_THYMOCYTES_DN	36	2.48413	0	1.80935e-05	pos
GSE22886_NAIVE_BCELL_VS_DC_DN	41	2.48203	0	1.78702e-05	pos
GSE24026_PD1_LIGATION_VS_CTRL_IN_ACT_TCELL_LINE_UP	39	2.48141	0	1.76522e-05	pos
CHICAS_RB1_TARGETS_CONFLUENT	102	2.47866	0	1.74396e-05	pos
GSE22886_DAY1_VS_DAY7_MONOCYTE_IN_CULTURE_DN	57	2.47407	0	3.41383e-05	pos
RICKMAN_TUMOR_DIFFERENTIATED_WELL_VS_POORLY_DN	54	2.47288	0	3.37367e-05	pos
KIM_BIPOLAR_DISORDER_OLIGODENDROCYTE_DENSITY_CORR_UP	180	2.47159	0	3.33444e-05	pos
LI_INDUCED_T_TO_NATURAL_KILLER_UP	38	2.47056	0	3.29612e-05	pos
GSE22140_HEALTHY_VS_ARTHRITIC_MOUSE_CD4_TCELL_UP	27	2.46656	0	3.25866e-05	pos
GSE37301_MULTIPOTENT_PROGENITOR_VS_CD4_TCELL_DN	53	2.4664	0	3.22205e-05	pos
KIM_ALL_DISORDERS_OLIGODENDROCYTE_NUMBER_CORR_UP	156	2.46487	0	3.18625e-05	pos
GO_POSITIVE_REGULATION_OF_EPITHELIAL_CELL_MIGRATION	27	2.46394	0	3.15123e-05	pos
GO_VACUOLE	115	2.46282	0	3.11698e-05	pos
GO_SECRETORY_GRANULE	105	2.46254	0	3.08346e-05	pos
GSE22886_NAIVE_CD4_TCELL_VS_MONOCYTE_DN	30	2.46024	0	4.56763e-05	pos
GNF2_EIF3S6	44	2.45969	0	4.51955e-05	pos
ROZANOV_MMP14_TARGETS_UP	41	2.45962	0	4.47247e-05	pos
GO_IMMUNE_EFFECTOR_PROCESS	149	2.45931	0	4.42637e-05	pos
WINTER_HYPOXIA_METAGENE	47	2.45891	0	4.3812e-05	pos
GSE8921_UNSTIM_VS_TLR1_2_STIM_MONOCYTE_24H_DN	40	2.45768	0	4.33694e-05	pos
GSE37533_PPARG1_FOXP3_VS_PPARG2_FOXP3_TRANSDUCED_CD4_TCELL_PIOGLITAZONE_TREATED_DN	50	2.45638	0	4.29357e-05	pos
GSE22886_DAY0_VS_DAY7_MONOCYTE_IN_CULTURE_DN	60	2.44558	0	7.09758e-05	pos
GSE41978_ID2_KO_VS_ID2_KO_AND_BIM_KO_KLRG1_LOW_EFFECTOR_CD8_TCELL_DN	51	2.44434	0	7.028e-05	pos
GO_CYTOSOLIC_RIBOSOME	43	2.44309	0	6.95977e-05	pos
GO_LEUKOCYTE_MEDIATED_IMMUNITY	104	2.43958	0	6.89285e-05	pos
GSE24634_TREG_VS_TCONV_POST_DAY3_IL4_CONVERSION_DN	38	2.43734	0	6.8272e-05	pos
GSE23568_ID3_TRANSDUCED_VS_ID3_KO_CD8_TCELL_UP	32	2.43521	0	6.76279e-05	pos
REACTOME_INNATE_IMMUNE_SYSTEM	144	2.43472	0	6.69959e-05	pos
GSE21927_SPLEEN_C57BL6_VS_4T1_TUMOR_BALBC_MONOCYTES_DN	42	2.43467	0	6.63756e-05	pos
GSE29618_BCELL_VS_MONOCYTE_DN	43	2.43386	0	7.86872e-05	pos
BOQUEST_STEM_CELL_UP	44	2.43069	0	7.79719e-05	pos
GSE24634_TREG_VS_TCONV_POST_DAY10_IL4_CONVERSION_DN	41	2.43031	0	7.72694e-05	pos
GSE6269_HEALTHY_VS_STAPH_PNEUMO_INF_PBMC_DN	29	2.43029	0	7.65795e-05	pos
GO_REGULATION_OF_PROTEOLYSIS	99	2.42434	0	7.59018e-05	pos
GO_CYTOPLASMIC_VESICLE_PART	223	2.42118	0	8.76613e-05	pos
LI_WILMS_TUMOR_VS_FETAL_KIDNEY_1_UP	25	2.41908	0	9.94914e-05	pos
GO_RESPONSE_TO_WOUNDING	75	2.41834	0	9.86337e-05	pos
GO_PIGMENT_GRANULE	29	2.41754	0	9.77907e-05	pos
MOOTHA_HUMAN_MITODB_6_2002	95	2.41691	0	9.6962e-05	pos
ACEVEDO_LIVER_CANCER_DN	75	2.41442	0	0.000108153	pos
MODULE_321	22	2.41366	0	0.000119233	pos
REACTOME_SIGNALING_BY_ROBO_RECEPTORS	66	2.40717	0	0.000165035	pos
MOOTHA_MITOCHONDRIA	92	2.40611	0	0.000163682	pos
GO_REGULATION_OF_PEPTIDASE_ACTIVITY	47	2.40007	0	0.000197265	pos
HALLMARK_INTERFERON_ALPHA_RESPONSE	19	2.39705	0	0.000195674	pos
GSE41978_ID2_KO_VS_BIM_KO_KLRG1_LOW_EFFECTOR_CD8_TCELL_UP	37	2.39424	0	0.000194108	pos
GO_SECRETORY_VESICLE	125	2.39317	0	0.000192568	pos
GSE37532_WT_VS_PPARG_KO_VISCERAL_ADIPOSE_TISSUE_TREG_DN	36	2.39098	0	0.000202414	pos
REACTOME_INFLUENZA_INFECTION	49	2.39079	0	0.000200833	pos
GSE12845_IGD_NEG_BLOOD_VS_PRE_GC_TONSIL_BCELL_UP	36	2.38928	0	0.000199276	pos
REACTOME_ER_TO_GOLGI_ANTEROGRADE_TRANSPORT	28	2.38913	0	0.000197743	pos
GO_PROTEIN_TARGETING_TO_MEMBRANE	57	2.38875	0	0.000196234	pos
GO_CELL_SURFACE	94	2.38368	0	0.000216334	pos
HOLLERN_EMT_BREAST_TUMOR_UP	24	2.38186	0	0.000214707	pos
GSE37533_PPARG1_FOXP3_VS_FOXP3_TRANSDUCED_CD4_TCELL_DN	39	2.38094	0	0.000213105	pos
GSE29618_BCELL_VS_PDC_DAY7_FLU_VACCINE_DN	30	2.38028	0	0.000211527	pos
GSE2770_TGFB_AND_IL4_ACT_VS_ACT_CD4_TCELL_2H_DN	38	2.37996	0	0.000209971	pos
GSE3982_DC_VS_BCELL_UP	35	2.37921	0	0.000208439	pos
REACTOME_COPI_MEDIATED_ANTEROGRADE_TRANSPORT	18	2.37399	0	0.000237831	pos
GSE17301_ACD3_ACD28_VS_ACD3_ACD28_AND_IFNA5_STIM_CD8_TCELL_DN	37	2.37395	0	0.00023612	pos
FULCHER_INFLAMMATORY_RESPONSE_LECTIN_VS_LPS_DN	71	2.37344	0	0.000234433	pos
STEIN_ESRRA_TARGETS_UP	90	2.37298	0	0.000232771	pos
GSE3920_UNTREATED_VS_IFNA_TREATED_ENDOTHELIAL_CELL_UP	31	2.369	0	0.000241085	pos
STEIN_ESRRA_TARGETS	118	2.36721	0	0.000239399	pos
ONDER_CDH1_TARGETS_2_UP	42	2.3671	0	0.000237737	pos
GO_REGULATION_OF_EPITHELIAL_CELL_MIGRATION	39	2.3589	0	0.000285554	pos
TARTE_PLASMA_CELL_VS_PLASMABLAST_UP	51	2.3554	0	0.000302895	pos
GSE22886_NAIVE_VS_IGM_MEMORY_BCELL_DN	43	2.35491	0	0.000300834	pos
GSE26495_NAIVE_VS_PD1LOW_CD8_TCELL_DN	32	2.35457	0	0.000298802	pos
ENK_UV_RESPONSE_EPIDERMIS_UP	51	2.3542	0	0.000306198	pos
GSE42021_CD24INT_VS_CD24LOW_TCONV_THYMUS_DN	28	2.35347	0	0.000313623	pos
GSE17974_IL4_AND_ANTI_IL12_VS_UNTREATED_48H_ACT_CD4_TCELL_UP	26	2.34965	0	0.000339985	pos
TAKAO_RESPONSE_TO_UVB_RADIATION_UP	23	2.34859	0	0.000337749	pos
MODULE_122	16	2.3483	0	0.000335541	pos
REACTOME_ASPARAGINE_N_LINKED_GLYCOSYLATION	60	2.34738	0	0.000333362	pos
GO_ENDOPLASMIC_RETICULUM_TO_GOLGI_VESICLE_MEDIATED_TRANSPORT	42	2.34692	0	0.000331212	pos
GSE10325_MYELOID_VS_LUPUS_MYELOID_DN	36	2.34284	0	0.00034721	pos
TIEN_INTESTINE_PROBIOTICS_6HR_UP	19	2.34272	0	0.000354172	pos
ZHONG_SECRETOME_OF_LUNG_CANCER_AND_FIBROBLAST	28	2.33674	0	0.000379103	pos
GSE19888_ADENOSINE_A3R_INH_PRETREAT_AND_ACT_BY_A3R_VS_TCELL_MEMBRANES_ACT_MAST_CELL_UP	37	2.33412	0	0.000376719	pos
GO_PROTEIN_LOCALIZATION_TO_MEMBRANE	124	2.33375	0	0.000374364	pos
GSE22140_GERMFREE_VS_SPF_MOUSE_CD4_TCELL_DN	42	2.33333	0	0.000372039	pos
MORF_JUND	28	2.33166	0	0.000369743	pos
GO_CELL_ACTIVATION_INVOLVED_IN_IMMUNE_RESPONSE	96	2.33112	0	0.000393534	pos
GSE42021_TREG_PLN_VS_CD24LO_TREG_THYMUS_DN	26	2.32633	0	0.000399917	pos
GSE25088_ROSIGLITAZONE_VS_IL4_AND_ROSIGLITAZONE_STIM_STAT6_KO_MACROPHAGE_DAY10_DN	38	2.32571	0	0.000406218	pos
GSE6269_FLU_VS_STAPH_AUREUS_INF_PBMC_DN	34	2.32513	0	0.000403771	pos
GSE13485_PRE_VS_POST_YF17D_VACCINATION_PBMC_DN	35	2.32238	0.00203666	0.000426768	pos
ENK_UV_RESPONSE_KERATINOCYTE_UP	82	2.32175	0	0.000424228	pos
GSE1460_CD4_THYMOCYTE_VS_THYMIC_STROMAL_CELL_DN	38	2.31874	0	0.000430154	pos
GSE40666_UNTREATED_VS_IFNA_STIM_EFFECTOR_CD8_TCELL_90MIN_UP	31	2.31819	0	0.000436092	pos
KEGG_LYSOSOME	33	2.31668	0	0.000433541	pos
GNF2_ST13	25	2.31529	0	0.000447817	pos
MCBRYAN_PUBERTAL_TGFB1_TARGETS_UP	38	2.31108	0	0.000478185	pos
GCM_TPT1	23	2.30992	0	0.000483642	pos
GSE22886_NAIVE_CD8_TCELL_VS_DC_DN	44	2.30625	0	0.000513467	pos
GO_EXOCYTOSIS	138	2.30526	0	0.000510549	pos
MORF_RAN	82	2.30025	0	0.000531573	pos
GO_FICOLIN_1_RICH_GRANULE	31	2.29761	0	0.000544629	pos
MILI_PSEUDOPODIA_HAPTOTAXIS_DN	154	2.29744	0	0.000541587	pos
GO_VACUOLAR_PART	86	2.29658	0	0.000538578	pos
LEI_MYB_TARGETS	47	2.2943	0	0.000551345	pos
RUIZ_TNC_TARGETS_UP	28	2.29341	0	0.000564081	pos
GO_CYTOSOLIC_LARGE_RIBOSOMAL_SUBUNIT	25	2.29329	0	0.000560999	pos
GSE42088_UNINF_VS_LEISHMANIA_INF_DC_4H_UP	38	2.29327	0	0.00055795	pos
GSE9316_IL6_KO_VS_IFNG_KO_INVIVO_EXPANDED_CD4_TCELL_DN	33	2.29286	0	0.000554934	pos
GSE24142_ADULT_VS_FETAL_DN2_THYMOCYTE_UP	29	2.2922	0	0.000559718	pos
DAVICIONI_TARGETS_OF_PAX_FOXO1_FUSIONS_UP	47	2.29121	0	0.00056435	pos
GCM_NPM1	32	2.28927	0	0.000584025	pos
GOLDRATH_NAIVE_VS_MEMORY_CD8_TCELL_DN	26	2.28886	0	0.000580935	pos
GSE29618_MONOCYTE_VS_MDC_UP	35	2.28855	0	0.000585296	pos
GOTZMANN_EPITHELIAL_TO_MESENCHYMAL_TRANSITION_DN	34	2.28805	0	0.000582232	pos
GO_CADHERIN_BINDING	66	2.2878	0	0.0005792	pos
REACTOME_METABOLISM_OF_AMINO_ACIDS_AND_DERIVATIVES	81	2.28777	0	0.000576199	pos
DUTERTRE_ESTRADIOL_RESPONSE_24HR_DN	90	2.28655	0	0.000602557	pos
LI_AMPLIFIED_IN_LUNG_CANCER	27	2.28529	0	0.000606773	pos
REACTOME_NONSENSE_MEDIATED_DECAY_NMD	45	2.28369	0	0.00062524	pos
GSE22140_GERMFREE_VS_SPF_ARTHRITIC_MOUSE_CD4_TCELL_DN	34	2.28321	0	0.000629191	pos
GSE34156_NOD2_LIGAND_VS_TLR1_TLR2_LIGAND_6H_TREATED_MONOCYTE_DN	31	2.2814	0	0.000669106	pos
GO_REGULATION_OF_BODY_FLUID_LEVELS	58	2.28122	0	0.000687038	pos
GSE29164_UNTREATED_VS_CD8_TCELL_TREATED_MELANOMA_DAY7_UP	30	2.27975	0	0.000690666	pos
REACTOME_METABOLISM_OF_CARBOHYDRATES	56	2.27637	0	0.000736698	pos
CHAUHAN_RESPONSE_TO_METHOXYESTRADIOL_DN	26	2.27503	0	0.000740056	pos
GSE2706_2H_VS_8H_R848_AND_LPS_STIM_DC_UP	47	2.27381	0	0.000757479	pos
ZHONG_SECRETOME_OF_LUNG_CANCER_AND_ENDOTHELIUM	18	2.2732	0	0.000767693	pos
GSE29618_BCELL_VS_MONOCYTE_DAY7_FLU_VACCINE_DN	37	2.27269	0	0.000770831	pos
IZADPANAH_STEM_CELL_ADIPOSE_VS_BONE_DN	22	2.27146	0	0.000794818	pos
GSE45837_WT_VS_GFI1_KO_PDC_DN	35	2.26905	0	0.000818335	pos
MILI_PSEUDOPODIA_CHEMOTAXIS_DN	101	2.26891	0	0.000821175	pos
GSE1460_CD4_THYMOCYTE_VS_NAIVE_CD4_TCELL_ADULT_BLOOD_DN	38	2.2674	0	0.000864717	pos
GSE37534_UNTREATED_VS_PIOGLITAZONE_TREATED_CD4_TCELL_PPARG1_AND_FOXP3_TRASDUCED_DN	45	2.26691	0	0.000867384	pos
GO_POSITIVE_REGULATION_OF_IMMUNE_SYSTEM_PROCESS	138	2.2668	0	0.000863273	pos
GSE10325_LUPUS_CD4_TCELL_VS_LUPUS_MYELOID_DN	34	2.26618	0	0.000859201	pos
GSE19825_NAIVE_VS_DAY3_EFF_CD8_TCELL_DN	42	2.26484	0	0.000868463	pos
HALLMARK_OXIDATIVE_PHOSPHORYLATION	52	2.26248	0	0.000910935	pos
WANG_SMARCE1_TARGETS_UP	54	2.2608	0	0.000946413	pos
GSE34156_UNTREATED_VS_6H_TLR1_TLR2_LIGAND_TREATED_MONOCYTE_UP	22	2.2604	0	0.000942031	pos
GSE40274_CTRL_VS_FOXP3_AND_XBP1_TRANSDUCED_ACTIVATED_CD4_TCELL_DN	26	2.26013	0	0.00093769	pos
REACTOME_TRANSPORT_TO_THE_GOLGI_AND_SUBSEQUENT_MODIFICATION	31	2.25975	0	0.000933389	pos
GO_EXTRACELLULAR_MATRIX	47	2.25925	0	0.000935621	pos
GO_COLLAGEN_CONTAINING_EXTRACELLULAR_MATRIX	40	2.25921	0	0.000931368	pos
GSE7548_DAY7_VS_DAY28_PCC_IMMUNIZATION_CD4_TCELL_DN	37	2.25883	0	0.000939832	pos
GSE10325_BCELL_VS_MYELOID_DN	32	2.25701	0	0.000986938	pos
GSE1460_DP_THYMOCYTE_VS_NAIVE_CD4_TCELL_ADULT_BLOOD_DN	34	2.25544	0	0.00100153	pos
ALONSO_METASTASIS_UP	42	2.25494	0	0.0010034	pos
MODULE_5	51	2.25461	0	0.00100528	pos
REACTOME_GLYCOSAMINOGLYCAN_METABOLISM	26	2.25421	0	0.00100721	pos
MODULE_47	34	2.25373	0	0.00101552	pos
BMI1_DN_MEL18_DN.V1_UP	19	2.25302	0	0.00101729	pos
GO_ENDOPLASMIC_RETICULUM_LUMEN	51	2.25224	0	0.00102526	pos
GSE22886_NAIVE_BCELL_VS_MONOCYTE_DN	33	2.25152	0	0.00102702	pos
MODULE_212	74	2.25079	0	0.00104711	pos
ACEVEDO_NORMAL_TISSUE_ADJACENT_TO_LIVER_TUMOR_DN	65	2.25066	0	0.0010426	pos
GSE46606_IRF4HIGH_VS_WT_CD40L_IL2_IL5_DAY3_STIMULATED_BCELL_DN	28	2.24914	0	0.00105032	pos
GSE32164_RESTING_DIFFERENTIATED_VS_CMYC_INHIBITED_MACROPHAGE_DN	29	2.24891	0	0.00104583	pos
GSE24634_IL4_VS_CTRL_TREATED_NAIVE_CD4_TCELL_DAY5_DN	40	2.24301	0	0.00115671	pos
GSE23308_CTRL_VS_CORTICOSTERONE_TREATED_MACROPHAGE_DN	30	2.24149	0	0.00116969	pos
GSE2706_2H_VS_8H_R848_STIM_DC_UP	26	2.24069	0	0.00116475	pos
GSE360_L_MAJOR_VS_B_MALAYI_HIGH_DOSE_MAC_DN	31	2.23849	0	0.00118963	pos
THUM_SYSTOLIC_HEART_FAILURE_UP	89	2.23808	0	0.00118465	pos
GSE37301_CD4_TCELL_VS_RAG2_KO_NK_CELL_DN	57	2.23562	0	0.00123333	pos
GSE40274_IRF4_VS_FOXP3_AND_IRF4_TRANSDUCED_ACTIVATED_CD4_TCELL_UP	38	2.23295	0	0.00126361	pos
GSE339_CD8POS_VS_CD4CD8DN_DC_IN_CULTURE_UP	38	2.23274	0	0.00126423	pos
BLUM_RESPONSE_TO_SALIRASIB_UP	61	2.23085	0	0.00127075	pos
GSE12845_PRE_GC_VS_DARKZONE_GC_TONSIL_BCELL_UP	33	2.22878	0	0.00130072	pos
GO_EXTRACELLULAR_STRUCTURE_ORGANIZATION	53	2.22873	0	0.00129541	pos
GSE19888_ADENOSINE_A3R_INH_PRETREAT_AND_ACT_BY_A3R_VS_TCELL_MEMBRANES_ACT_MAST_CELL_DN	38	2.22865	0	0.00129603	pos
GO_CELL_ADHESION_MOLECULE_BINDING	89	2.22838	0	0.00129078	pos
GSE39820_CTRL_VS_TGFBETA3_IL6_CD4_TCELL_DN	52	2.22732	0	0.00129704	pos
MULLIGHAN_MLL_SIGNATURE_1_UP	71	2.22553	0	0.00133199	pos
GSE12392_CD8A_POS_VS_NEG_SPLEEN_IFNB_KO_DC_UP	45	2.22344	0	0.00136094	pos
GSE29618_MONOCYTE_VS_MDC_DAY7_FLU_VACCINE_UP	38	2.22283	0	0.00136683	pos
GSE24634_TREG_VS_TCONV_POST_DAY7_IL4_CONVERSION_DN	38	2.2222	0	0.00137803	pos
GSE13484_UNSTIM_VS_YF17D_VACCINE_STIM_PBMC_DN	31	2.22043	0	0.00138933	pos
GSE41176_WT_VS_TAK1_KO_ANTI_IGM_STIM_BCELL_24H_UP	45	2.21998	0	0.00139504	pos
GSE9650_NAIVE_VS_MEMORY_CD8_TCELL_DN	27	2.21731	0	0.00144544	pos
ZHONG_SECRETOME_OF_LUNG_CANCER_AND_MACROPHAGE	21	2.21621	0	0.00145647	pos
GSE24634_TEFF_VS_TCONV_DAY3_IN_CULTURE_DN	38	2.21586	0	0.00146202	pos
GSE22886_DAY0_VS_DAY1_MONOCYTE_IN_CULTURE_DN	41	2.21541	0	0.00147854	pos
GO_RIBOSOME	67	2.21471	0	0.00148378	pos
GSE21380_TFH_VS_GERMINAL_CENTER_TFH_CD4_TCELL_UP	34	2.21289	0	0.00157655	pos
GSE6269_E_COLI_VS_STAPH_AUREUS_INF_PBMC_DN	36	2.21088	0	0.00159228	pos
REACTOME_ACTIVATION_OF_THE_MRNA_UPON_BINDING_OF_THE_CAP_BINDING_COMPLEX_AND_EIFS_AND_SUBSEQUENT_BINDING_TO_43S	24	2.21083	0	0.00159166	pos
GO_DEFENSE_RESPONSE	183	2.20733	0	0.0016562	pos
GSE21546_UNSTIM_VS_ANTI_CD3_STIM_ELK1_KO_DP_THYMOCYTES_UP	24	2.207	0	0.00164993	pos
GO_ESTABLISHMENT_OF_PROTEIN_LOCALIZATION_TO_MEMBRANE	76	2.20606	0	0.00167051	pos
GO_POSITIVE_REGULATION_OF_ENDOTHELIAL_CELL_MIGRATION	21	2.20481	0	0.00168031	pos
GSE19888_ADENOSINE_A3R_INH_VS_ACT_WITH_INHIBITOR_PRETREATMENT_IN_MAST_CELL_UP	28	2.20447	0	0.00168468	pos
GO_ORGANIC_ACID_METABOLIC_PROCESS	142	2.20409	0	0.00168361	pos
GSE15735_CTRL_VS_HDAC_INHIBITOR_TREATED_CD4_TCELL_12H_UP	37	2.20381	0	0.00167735	pos
WALLACE_PROSTATE_CANCER_RACE_UP	31	2.20361	0	0.00167644	pos
HALLMARK_PROTEIN_SECRETION	24	2.20018	0	0.00173812	pos
GSE37605_TREG_VS_TCONV_C57BL6_FOXP3_IRES_GFP_DN	35	2.19883	0	0.00174221	pos
KAAB_FAILED_HEART_ATRIUM_DN	41	2.19866	0	0.0017463	pos
GSE19198_CTRL_VS_IL21_TREATED_TCELL_6H_DN	31	2.19862	0	0.00173993	pos
AP1_Q6	43	2.19718	0	0.00177504	pos
GSE40274_CTRL_VS_FOXP3_TRANSDUCED_ACTIVATED_CD4_TCELL_DN	33	2.19571	0	0.00180495	pos
MULLIGHAN_MLL_SIGNATURE_2_UP	71	2.19217	0	0.00188055	pos
GSE2405_0H_VS_1.5H_A_PHAGOCYTOPHILUM_STIM_NEUTROPHIL_UP	23	2.19199	0	0.00187378	pos
RUTELLA_RESPONSE_TO_HGF_UP	76	2.18893	0	0.00197422	pos
GO_ORGANELLE_ENVELOPE_LUMEN	16	2.1847	0	0.00206889	pos
GO_NUCLEAR_TRANSCRIBED_MRNA_CATABOLIC_PROCESS_NONSENSE_MEDIATED_DECAY	45	2.18438	0	0.00206653	pos
GSE35825_UNTREATED_VS_IFNG_STIM_MACROPHAGE_UP	36	2.18415	0	0.0020692	pos
GSE3982_DC_VS_NKCELL_UP	37	2.18319	0	0.00208701	pos
KEGG_PARKINSONS_DISEASE	33	2.18311	0	0.00208466	pos
GSE3337_4H_VS_16H_IFNG_IN_CD8POS_DC_UP	36	2.18239	0	0.0020824	pos
GSE14000_TRANSLATED_RNA_VS_MRNA_DC_DN	51	2.18151	0	0.00209501	pos
JOHNSTONE_PARVB_TARGETS_2_UP	27	2.18126	0.00195695	0.00209271	pos
GALINDO_IMMUNE_RESPONSE_TO_ENTEROTOXIN	18	2.18091	0	0.0020954	pos
BHAT_ESR1_TARGETS_NOT_VIA_AKT1_DN	23	2.18069	0	0.00209802	pos
YAO_TEMPORAL_RESPONSE_TO_PROGESTERONE_CLUSTER_13	39	2.18047	0	0.00210052	pos
GSE26495_NAIVE_VS_PD1HIGH_CD8_TCELL_DN	34	2.17965	0	0.00212748	pos
HALLMARK_INTERFERON_GAMMA_RESPONSE	40	2.17905	0	0.00213469	pos
GSE1432_1H_VS_24H_IFNG_MICROGLIA_UP	39	2.17842	0	0.00214197	pos
GSE22886_NAIVE_VS_IGG_IGA_MEMORY_BCELL_DN	41	2.17697	0	0.00219754	pos
GSE17721_0.5H_VS_8H_LPS_BMDC_UP	40	2.17687	0	0.00219969	pos
GSE1460_DP_VS_CD4_THYMOCYTE_DN	35	2.17386	0	0.00230267	pos
REACTOME_EXTRACELLULAR_MATRIX_ORGANIZATION	44	2.17306	0	0.00232377	pos
REACTOME_INFECTIOUS_DISEASE	92	2.17263	0	0.00232559	pos
GO_AMINOGLYCAN_BIOSYNTHETIC_PROCESS	21	2.17168	0	0.00233682	pos
GSE10325_CD4_TCELL_VS_MYELOID_DN	34	2.17159	0	0.00233374	pos
GO_VIRAL_GENE_EXPRESSION	60	2.1691	0	0.00246317	pos
GSE22886_NAIVE_BCELL_VS_NEUTROPHIL_DN	22	2.1689	0	0.00245971	pos
GSE17721_POLYIC_VS_PAM3CSK4_12H_BMDC_DN	35	2.16697	0	0.00248915	pos
GSE6269_HEALTHY_VS_FLU_INF_PBMC_UP	35	2.16638	0	0.00249494	pos
SESTO_RESPONSE_TO_UV_C7	16	2.1653	0	0.00251479	pos
GO_AMEBOIDAL_TYPE_CELL_MIGRATION	56	2.16437	0	0.00253903	pos
GSE19941_IL10_KO_VS_IL10_KO_AND_NFKBP50_KO_LPS_STIM_MACROPHAGE_UP	32	2.16338	0	0.00255853	pos
SUNG_METASTASIS_STROMA_UP	30	2.16166	0	0.00260598	pos
GSE360_T_GONDII_VS_B_MALAYI_HIGH_DOSE_DC_DN	39	2.1613	0	0.00261142	pos
GSE26030_TH1_VS_TH17_RESTIMULATED_DAY5_POST_POLARIZATION_UP	47	2.16062	0	0.0026076	pos
MORF_UBE2I	64	2.15905	0	0.00263595	pos
ONDER_CDH1_TARGETS_2_DN	53	2.15786	0	0.00266382	pos
GSE10325_BCELL_VS_LUPUS_BCELL_DN	45	2.15727	0	0.00270101	pos
GSE13738_RESTING_VS_BYSTANDER_ACTIVATED_CD4_TCELL_DN	43	2.15689	0	0.00270144	pos
GSE34156_TLR1_TLR2_LIGAND_VS_NOD2_AND_TLR1_TLR2_LIGAND_24H_TREATED_MONOCYTE_UP	25	2.15625	0	0.00271086	pos
GSE1432_1H_VS_24H_IFNG_MICROGLIA_DN	47	2.15588	0	0.00272036	pos
GSE17721_0.5H_VS_8H_CPG_BMDC_UP	41	2.15587	0	0.00271178	pos
GSE19401_PAM2CSK4_VS_RETINOIC_ACID_AND_PAM2CSK4_STIM_FOLLICULAR_DC_DN	31	2.15509	0	0.00272106	pos
TIEN_INTESTINE_PROBIOTICS_24HR_DN	54	2.15492	0	0.00272145	pos
GSE24634_IL4_VS_CTRL_TREATED_NAIVE_CD4_TCELL_DAY5_UP	31	2.15413	0	0.00273963	pos
GO_GOLGI_VESICLE_TRANSPORT	74	2.15391	0	0.00273994	pos
BHAT_ESR1_TARGETS_VIA_AKT1_DN	17	2.15381	0	0.00273143	pos
LAIHO_COLORECTAL_CANCER_SERRATED_UP	26	2.15305	0	0.00274494	pos
GO_POSITIVE_REGULATION_OF_I_KAPPAB_KINASE_NF_KAPPAB_SIGNALING	27	2.15265	0	0.00274521	pos
GSE12392_IFNAR_KO_VS_IFNB_KO_CD8_NEG_SPLEEN_DC_DN	31	2.15187	0	0.00278045	pos
IZADPANAH_STEM_CELL_ADIPOSE_VS_BONE_UP	25	2.1511	0	0.00279812	pos
GO_TISSUE_MIGRATION	43	2.15075	0	0.00280267	pos
GSE42021_TREG_VS_TCONV_PLN_DN	44	2.15011	0	0.0028159	pos
GO_REGULATION_OF_ENDOTHELIAL_CELL_MIGRATION	29	2.15	0	0.0028161	pos
GSE6259_DEC205_POS_DC_VS_CD8_TCELL_UP	36	2.14861	0	0.00286394	pos
GSE42724_NAIVE_VS_B1_BCELL_DN	37	2.14781	0	0.00288119	pos
GO_AMINOGLYCAN_METABOLIC_PROCESS	21	2.14764	0	0.00287251	pos
GSE40274_CTRL_VS_XBP1_TRANSDUCED_ACTIVATED_CD4_TCELL_UP	32	2.14508	0	0.00294085	pos
GO_ESTABLISHMENT_OF_PROTEIN_LOCALIZATION_TO_ORGANELLE	119	2.14506	0	0.00293204	pos
GSE360_LOW_DOSE_B_MALAYI_VS_M_TUBERCULOSIS_DC_DN	39	2.14467	0	0.00293179	pos
REACTOME_RESPONSE_TO_ELEVATED_PLATELET_CYTOSOLIC_CA2PLUS	22	2.14427	0	0.00293576	pos
GSE40666_UNTREATED_VS_IFNA_STIM_STAT1_KO_CD8_TCELL_90MIN_UP	22	2.14389	0	0.00292705	pos
GO_VESICLE_COAT	19	2.14381	0	0.00291839	pos
GSE37533_PPARG1_FOXP3_VS_FOXP3_TRANSDUCED_CD4_TCELL_PIOGLITAZONE_TREATED_UP	34	2.14374	0	0.00290978	pos
GSE1460_INTRATHYMIC_T_PROGENITOR_VS_DP_THYMOCYTE_UP	46	2.14308	0	0.00291791	pos
GSE11961_MEMORY_BCELL_DAY7_VS_GERMINAL_CENTER_BCELL_DAY7_UP	37	2.14167	0	0.00293865	pos
GO_ENDOPLASMIC_RETICULUM_PART	230	2.14166	0	0.00293006	pos
GSE21546_UNSTIM_VS_ANTI_CD3_STIM_SAP1A_KO_AND_ELK1_KO_DP_THYMOCYTES_UP	22	2.14165	0	0.00292152	pos
GSE36826_WT_VS_IL1R_KO_SKIN_STAPH_AUREUS_INF_DN	33	2.14056	0	0.00293782	pos
GSE40274_CTRL_VS_LEF1_TRANSDUCED_ACTIVATED_CD4_TCELL_UP	35	2.14009	0	0.0029417	pos
NABA_SECRETED_FACTORS	16	2.14006	0	0.00293733	pos
MIYAGAWA_TARGETS_OF_EWSR1_ETS_FUSIONS_DN	47	2.13981	0	0.00294934	pos
GSE43955_1H_VS_20H_ACT_CD4_TCELL_WITH_TGFB_IL6_DN	29	2.13937	0	0.00295314	pos
LANDIS_ERBB2_BREAST_TUMORS_324_DN	24	2.13831	0	0.00302647	pos
MODULE_43	21	2.13831	0	0.00301783	pos
GO_ENDOPLASMIC_RETICULUM	310	2.13805	0	0.00301744	pos
RASHI_RESPONSE_TO_IONIZING_RADIATION_2	21	2.13804	0.00196078	0.00300886	pos
GSE30971_CTRL_VS_LPS_STIM_MACROPHAGE_WBP7_KO_2H_UP	31	2.13663	0	0.00303656	pos
GSE21360_PRIMARY_VS_QUATERNARY_MEMORY_CD8_TCELL_UP	27	2.13478	0	0.00309226	pos
MODULE_235	21	2.13397	0	0.00312369	pos
AZARE_NEOPLASTIC_TRANSFORMATION_BY_STAT3_UP	25	2.13199	0	0.003179	pos
GSE42021_CD24HI_VS_CD24INT_TREG_THYMUS_UP	41	2.13044	0	0.00325368	pos
YAO_TEMPORAL_RESPONSE_TO_PROGESTERONE_CLUSTER_12	15	2.12981	0	0.00326434	pos
MODULE_93	45	2.12975	0	0.00325923	pos
GSE30971_WBP7_HET_VS_KO_MACROPHAGE_2H_LPS_STIM_UP	40	2.12675	0	0.00338831	pos
GO_NEGATIVE_REGULATION_OF_PROTEOLYSIS	39	2.12666	0	0.00338289	pos
GO_POSITIVE_REGULATION_OF_VASCULATURE_DEVELOPMENT	28	2.12665	0	0.00337354	pos
GSE17721_CTRL_VS_POLYIC_0.5H_BMDC_DN	23	2.12636	0.0019802	0.00337602	pos
YAO_TEMPORAL_RESPONSE_TO_PROGESTERONE_CLUSTER_17	39	2.12567	0	0.00339804	pos
GSE17721_ALL_VS_24H_PAM3CSK4_BMDC_DN	36	2.12515	0	0.00340428	pos
GSE21360_PRIMARY_VS_TERTIARY_MEMORY_CD8_TCELL_DN	30	2.12361	0	0.00346101	pos
GSE15930_NAIVE_VS_72H_IN_VITRO_STIM_IL12_CD8_TCELL_DN	31	2.12355	0	0.00345158	pos
GO_GOLGI_ASSOCIATED_VESICLE	32	2.12281	0	0.00344996	pos
GSE17186_NAIVE_VS_CD21HIGH_TRANSITIONAL_BCELL_CORD_BLOOD_UP	40	2.12193	0	0.00348321	pos
WANG_TUMOR_INVASIVENESS_UP	78	2.12188	0	0.00348157	pos
GSE2770_IL4_ACT_VS_ACT_CD4_TCELL_6H_UP	45	2.11962	0	0.00354504	pos
GSE11057_NAIVE_CD4_VS_PBMC_CD4_TCELL_DN	47	2.11747	0	0.00364246	pos
GSE2770_TGFB_AND_IL4_VS_IL12_TREATED_ACT_CD4_TCELL_48H_UP	40	2.11681	0	0.00367081	pos
MORF_EI24	32	2.1166	0	0.00367248	pos
GSE10147_IL3_VS_IL3_AND_HIVP17_STIM_PDC_DN	22	2.11633	0	0.00368175	pos
GSE19888_ADENOSINE_A3R_INH_VS_INH_PRETREAT_AND_ACT_WITH_TCELL_MEMBRANES_MAST_CELL_UP	47	2.11299	0	0.00380068	pos
GSE2826_WT_VS_BTK_KO_BCELL_DN	29	2.11259	0	0.00380574	pos
KAECH_DAY8_EFF_VS_DAY15_EFF_CD8_TCELL_UP	50	2.1123	0	0.00380693	pos
GSE41176_UNSTIM_VS_ANTI_IGM_STIM_BCELL_1H_DN	40	2.11111	0	0.00384214	pos
CAIRO_HEPATOBLASTOMA_CLASSES_DN	31	2.11019	0	0.00387336	pos
TARTE_PLASMA_CELL_VS_B_LYMPHOCYTE_UP	16	2.11001	0	0.00386699	pos
HOLLMANN_APOPTOSIS_VIA_CD40_DN	65	2.10866	0	0.00392782	pos
MORF_RAC1	53	2.10765	0	0.00396587	pos
GSE36078_UNTREATED_VS_AD5_INF_MOUSE_LUNG_DC_DN	44	2.10752	0	0.0039629	pos
GSE9006_HEALTHY_VS_TYPE_2_DIABETES_PBMC_AT_DX_UP	27	2.10747	0.00214592	0.00395261	pos
GO_GOLGI_ASSOCIATED_VESICLE_MEMBRANE	20	2.10737	0	0.00394237	pos
GO_LYASE_ACTIVITY	41	2.10725	0	0.00393596	pos
GO_CYTOSOLIC_SMALL_RIBOSOMAL_SUBUNIT	16	2.10677	0	0.00394426	pos
GSE5099_CLASSICAL_M1_VS_ALTERNATIVE_M2_MACROPHAGE_UP	43	2.10551	0	0.00397432	pos
KATSANOU_ELAVL1_TARGETS_UP	25	2.10499	0	0.00398227	pos
GSE3982_MAST_CELL_VS_TH2_UP	33	2.1031	0	0.004023	pos
RB_DN.V1_DN	21	2.10285	0	0.00402724	pos
GO_TOLL_LIKE_RECEPTOR_SIGNALING_PATHWAY	20	2.10233	0	0.00403143	pos
GO_RESPONSE_TO_CYTOKINE	171	2.10081	0	0.00410076	pos
HALLMARK_HEME_METABOLISM	35	2.10003	0	0.00414071	pos
GO_MONOSACCHARIDE_BINDING	16	2.09854	0	0.00417702	pos
GO_LARGE_RIBOSOMAL_SUBUNIT	38	2.09839	0	0.00417727	pos
MORF_AP3D1	37	2.09813	0.00197628	0.00417029	pos
KAECH_NAIVE_VS_DAY15_EFF_CD8_TCELL_DN	31	2.09802	0	0.00417051	pos
GO_ANTIGEN_PROCESSING_AND_PRESENTATION	46	2.09802	0	0.00416371	pos
GSE2770_TGFB_AND_IL4_ACT_VS_ACT_CD4_TCELL_48H_DN	41	2.09783	0	0.00417466	pos
GSE13485_CTRL_VS_DAY7_YF17D_VACCINE_PBMC_DN	29	2.09706	0	0.00419962	pos
AP1_Q4	40	2.09657	0	0.00423162	pos
GNF2_TPT1	20	2.09651	0	0.00422471	pos
GO_RESPONSE_TO_INTERFERON_GAMMA	27	2.09634	0.0019305	0.00422486	pos
GO_VACUOLAR_LUMEN	33	2.09621	0	0.00421446	pos
GSE22886_NAIVE_CD4_TCELL_VS_DC_DN	47	2.09561	0.00199203	0.00423916	pos
WONG_MITOCHONDRIA_GENE_MODULE	53	2.09485	0	0.00430188	pos
GSE3039_NKT_CELL_VS_ALPHAALPHA_CD8_TCELL_DN	24	2.09467	0	0.00430526	pos
GSE3982_MAC_VS_EFF_MEMORY_CD4_TCELL_UP	58	2.09434	0	0.00430169	pos
KAYO_CALORIE_RESTRICTION_MUSCLE_UP	15	2.09056	0	0.0045056	pos
LIM_MAMMARY_STEM_CELL_UP	72	2.09012	0	0.00451537	pos
MODULE_324	17	2.08996	0	0.0045217	pos
RUTELLA_RESPONSE_TO_HGF_VS_CSF2RB_AND_IL4_UP	72	2.08894	0	0.00456587	pos
GSE360_CTRL_VS_T_GONDII_DC_UP	33	2.08816	0	0.00461325	pos
GO_MULTI_MULTICELLULAR_ORGANISM_PROCESS	27	2.08798	0	0.00461589	pos
GSE17974_IL4_AND_ANTI_IL12_VS_UNTREATED_48H_ACT_CD4_TCELL_DN	31	2.08717	0.00187266	0.00464915	pos
LEE_BMP2_TARGETS_UP	118	2.08698	0	0.00464138	pos
GSE22140_HEALTHY_VS_ARTHRITIC_GERMFREE_MOUSE_CD4_TCELL_DN	36	2.08689	0	0.00463372	pos
GSE41978_KLRG1_HIGH_VS_LOW_EFFECTOR_CD8_TCELL_DN	54	2.08526	0	0.00470073	pos
GSE21670_STAT3_KO_VS_WT_CD4_TCELL_TGFB_IL6_TREATED_DN	34	2.08319	0	0.00478095	pos
GSE33424_CD161_HIGH_VS_INT_CD8_TCELL_UP	31	2.08292	0	0.00479648	pos
GSE41867_MEMORY_VS_EXHAUSTED_CD8_TCELL_DAY30_LCMV_DN	47	2.08277	0	0.00479872	pos
GSE32034_LY6C_HIGH_VS_LOW_ROSIGLIZATONE_TREATED_MONOCYTE_UP	43	2.08106	0	0.00487463	pos
GO_EXTERNAL_SIDE_OF_PLASMA_MEMBRANE	31	2.08055	0.00191571	0.00488997	pos
PETROVA_ENDOTHELIUM_LYMPHATIC_VS_BLOOD_DN	28	2.07975	0	0.00492852	pos
GO_MYELOID_CELL_DIFFERENTIATION	57	2.07963	0	0.00491698	pos
REACTOME_COLLAGEN_FORMATION	15	2.07909	0	0.00493204	pos
GO_BONE_DEVELOPMENT	28	2.07895	0	0.00492721	pos
GSE29618_PDC_VS_MDC_DAY7_FLU_VACCINE_DN	31	2.07882	0	0.00492567	pos
GSE40685_TREG_VS_FOXP3_KO_TREG_PRECURSOR_UP	36	2.07873	0	0.00491754	pos
LIN_MELANOMA_COPY_NUMBER_UP	16	2.07836	0.00203252	0.00492265	pos
GSE16385_ROSIGLITAZONE_IL4_VS_IL4_ALONE_STIM_MACROPHAGE_12H_DN	36	2.07771	0	0.00493748	pos
GO_SMALL_MOLECULE_METABOLIC_PROCESS	279	2.07694	0	0.00496544	pos
GO_CYTOSOLIC_PART	59	2.07651	0	0.00497031	pos
GSE9316_IL6_KO_VS_IFNG_KO_INVIVO_EXPANDED_CD4_TCELL_UP	41	2.07581	0	0.00498171	pos
RICKMAN_METASTASIS_DN	36	2.07466	0	0.0050226	pos
GSE25085_FETAL_BM_VS_ADULT_BM_SP4_THYMIC_IMPLANT_UP	41	2.07456	0	0.00501759	pos
GSE18281_CORTICAL_VS_MEDULLARY_THYMOCYTE_UP	36	2.07441	0	0.00501262	pos
GSE3982_MAST_CELL_VS_DC_DN	34	2.07386	0	0.00503968	pos
GSE360_DC_VS_MAC_B_MALAYI_LOW_DOSE_DN	32	2.0731	0.00200803	0.00508627	pos
GSE2770_UNTREATED_VS_ACT_CD4_TCELL_6H_UP	35	2.07293	0	0.00508116	pos
GSE5542_UNTREATED_VS_IFNA_TREATED_EPITHELIAL_CELLS_24H_UP	36	2.07153	0	0.00512087	pos
GO_PROTEOLYSIS	261	2.07128	0	0.0051286	pos
GSE32164_ALTERNATIVELY_ACT_M2_VS_CMYC_INHIBITED_MACROPHAGE_UP	34	2.07065	0.00195312	0.00515236	pos
GSE34006_A2AR_KO_VS_A2AR_AGONIST_TREATED_TREG_UP	45	2.07048	0	0.00515033	pos
GSE3982_CTRL_VS_LPS_48H_DC_UP	39	2.06992	0	0.00516728	pos
GSE42088_UNINF_VS_LEISHMANIA_INF_DC_4H_DN	44	2.06978	0	0.0051621	pos
GO_GOLGI_MEMBRANE	121	2.06954	0	0.00516659	pos
GO_REGULATION_OF_DEFENSE_RESPONSE	101	2.06928	0	0.00516776	pos
GSE22443_NAIVE_VS_ACT_AND_IL12_TREATED_CD8_TCELL_UP	40	2.06905	0	0.00516258	pos
GO_EPITHELIUM_DEVELOPMENT	168	2.0683	0	0.00520785	pos
GO_BLOOD_VESSEL_MORPHOGENESIS	85	2.06785	0	0.00521837	pos
DELYS_THYROID_CANCER_UP	48	2.06553	0	0.00535722	pos
BURTON_ADIPOGENESIS_9	15	2.06455	0	0.00540813	pos
GSE26030_TH1_VS_TH17_DAY15_POST_POLARIZATION_DN	27	2.0645	0	0.0053994	pos
GO_HYDROLASE_ACTIVITY_HYDROLYZING_O_GLYCOSYL_COMPOUNDS	15	2.064	0	0.00541566	pos
GO_BLOOD_VESSEL_ENDOTHELIAL_CELL_MIGRATION	19	2.06393	0	0.00540699	pos
GAVIN_FOXP3_TARGETS_CLUSTER_T7	19	2.06356	0.00196464	0.00540762	pos
GO_REGULATION_OF_CYSTEINE_TYPE_ENDOPEPTIDASE_ACTIVITY	31	2.06259	0	0.00543916	pos
GSE42021_CD24HI_TREG_VS_CD24HI_TCONV_THYMUS_UP	33	2.06241	0	0.00543047	pos
MORF_CSNK2B	75	2.06197	0	0.00543711	pos
PROVENZANI_METASTASIS_DN	20	2.06123	0.00197239	0.00548987	pos
GSE44649_WT_VS_MIR155_KO_NAIVE_CD8_TCELL_DN	36	2.05937	0	0.00557628	pos
GSE44955_MCSF_VS_MCSF_AND_IL27_STIM_MACROPHAGE_UP	38	2.05904	0	0.0055826	pos
WEST_ADRENOCORTICAL_TUMOR_DN	93	2.05836	0	0.00560124	pos
GSE9037_CTRL_VS_LPS_4H_STIM_BMDM_UP	33	2.05804	0	0.00560446	pos
GSE13485_DAY7_VS_DAY21_YF17D_VACCINE_PBMC_UP	37	2.05787	0	0.00560164	pos
CHR6P21	32	2.05747	0	0.00560498	pos
SANA_RESPONSE_TO_IFNG_DN	17	2.05714	0	0.00560518	pos
AP1_01	51	2.05714	0	0.00559628	pos
KIM_ALL_DISORDERS_DURATION_CORR_DN	27	2.05679	0	0.00560861	pos
GO_FORMATION_OF_PRIMARY_GERM_LAYER	16	2.05678	0	0.00559973	pos
GSE3982_BCELL_VS_TH2_UP	29	2.05677	0	0.00558792	pos
GSE18281_SUBCAPSULAR_VS_CENTRAL_CORTICAL_REGION_OF_THYMUS_DN	36	2.05525	0	0.00566588	pos
LU_EZH2_TARGETS_UP	35	2.0539	0	0.00576477	pos
GO_SMALL_RIBOSOMAL_SUBUNIT	21	2.05375	0	0.00576474	pos
GO_SECRETION	224	2.05277	0	0.00580323	pos
GSE40685_TREG_VS_FOXP3_KO_TREG_PRECURSOR_DN	35	2.05197	0	0.00585649	pos
GO_REGULATION_OF_VASCULATURE_DEVELOPMENT	45	2.05186	0	0.0058561	pos
GSE22886_IGM_MEMORY_BCELL_VS_BM_PLASMA_CELL_DN	35	2.05164	0	0.00585283	pos
BROWNE_HCMV_INFECTION_24HR_DN	22	2.05091	0	0.00589692	pos
GO_BIOMINERAL_TISSUE_DEVELOPMENT	19	2.04877	0.0040568	0.00600536	pos
GSE360_DC_VS_MAC_L_DONOVANI_DN	38	2.04868	0	0.00599295	pos
SWEET_LUNG_CANCER_KRAS_UP	67	2.04824	0	0.00600708	pos
GO_RECEPTOR_METABOLIC_PROCESS	32	2.04772	0.00199203	0.0060153	pos
MACAEVA_PBMC_RESPONSE_TO_IR	17	2.04767	0.00193424	0.00600584	pos
GSE22886_NEUTROPHIL_VS_MONOCYTE_DN	56	2.0453	0	0.00614488	pos
BURTON_ADIPOGENESIS_5	23	2.04526	0.00204082	0.00613521	pos
GO_MITOCHONDRIAL_MEMBRANE_PART	47	2.0451	0	0.00612852	pos
GSE2770_IL12_AND_TGFB_ACT_VS_ACT_CD4_TCELL_2H_UP	33	2.0441	0	0.00617116	pos
GSE2706_UNSTIM_VS_2H_LPS_DC_DN	28	2.04305	0	0.00624278	pos
GO_INNATE_IMMUNE_RESPONSE	113	2.04226	0	0.00628513	pos
CONCANNON_APOPTOSIS_BY_EPOXOMICIN_UP	50	2.04186	0	0.00630403	pos
GSE22935_WT_VS_MYD88_KO_MACROPHAGE_UP	33	2.04186	0	0.00629129	pos
CHR1P34	29	2.04155	0	0.00631292	pos
GSE339_CD4POS_VS_CD8POS_DC_IN_CULTURE_DN	40	2.04061	0	0.00636323	pos
GO_PROTON_TRANSMEMBRANE_TRANSPORT	19	2.03925	0	0.006456	pos
GO_AZUROPHIL_GRANULE_LUMEN	19	2.03864	0	0.00647154	pos
MCBRYAN_PUBERTAL_BREAST_5_6WK_UP	22	2.03845	0	0.00648425	pos
GO_POLYSOME	20	2.03832	0	0.00649399	pos
BERENJENO_TRANSFORMED_BY_RHOA_DN	84	2.03599	0	0.00664532	pos
GO_INTRACELLULAR_PROTEIN_TRANSPORT	238	2.03558	0	0.00666044	pos
HARRIS_HYPOXIA	20	2.03463	0.00386847	0.00672619	pos
MORF_CTBP1	48	2.03421	0.00204918	0.00675225	pos
GO_CELLULAR_LIPID_METABOLIC_PROCESS	132	2.03389	0	0.00675571	pos
HALLMARK_ADIPOGENESIS	42	2.03249	0	0.00682662	pos
KINSEY_TARGETS_OF_EWSR1_FLII_FUSION_DN	75	2.03237	0	0.00681873	pos
MORF_MAP2K2	38	2.03187	0	0.00684159	pos
REACTOME_AXON_GUIDANCE	116	2.03157	0	0.0068449	pos
GSE32423_CTRL_VS_IL4_MEMORY_CD8_TCELL_DN	44	2.03152	0	0.00683434	pos
GSE26030_UNSTIM_VS_RESTIM_TH1_DAY5_POST_POLARIZATION_DN	39	2.03092	0	0.00686261	pos
GO_ANATOMICAL_STRUCTURE_FORMATION_INVOLVED_IN_MORPHOGENESIS	147	2.0303	0	0.00688802	pos
REACTOME_PCP_CE_PATHWAY	23	2.0301	0.00192308	0.00688569	pos
GO_NEGATIVE_REGULATION_OF_PEPTIDASE_ACTIVITY	16	2.02803	0.00189753	0.00700768	pos
GSE22886_NAIVE_TCELL_VS_MONOCYTE_DN	31	2.0275	0	0.00703818	pos
GSE24634_TEFF_VS_TCONV_DAY5_IN_CULTURE_DN	34	2.02701	0	0.00706018	pos
GO_CHONDROCYTE_DIFFERENTIATION	18	2.02401	0.00392157	0.00723877	pos
GO_HYDROLASE_ACTIVITY_ACTING_ON_GLYCOSYL_BONDS	19	2.02385	0.00195312	0.00723032	pos
AP1_Q6_01	38	2.0235	0	0.00724373	pos
GO_ENDOSOME	137	2.02305	0	0.0072599	pos
KEGG_OXIDATIVE_PHOSPHORYLATION	30	2.02192	0	0.00734397	pos
GSE11057_EFF_MEM_VS_CENT_MEM_CD4_TCELL_UP	28	2.02173	0.00212314	0.00735176	pos
GO_LEUKOCYTE_CELL_CELL_ADHESION	38	2.0217	0	0.00733773	pos
GSE16385_MONOCYTE_VS_12H_ROSIGLITAZONE_TREATED_MACROPHAGE_UP	44	2.01955	0	0.00749963	pos
GSE15330_LYMPHOID_MULTIPOTENT_VS_GRANULOCYTE_MONOCYTE_PROGENITOR_IKAROS_KO_DN	24	2.01919	0.00197239	0.00752584	pos
GO_REGULATION_OF_IMMUNE_SYSTEM_PROCESS	199	2.0187	0	0.00757096	pos
SMIRNOV_CIRCULATING_ENDOTHELIOCYTES_IN_CANCER_UP	23	2.01815	0.00181488	0.00759961	pos
GSE17974_2H_VS_72H_UNTREATED_IN_VITRO_CD4_TCELL_DN	44	2.01733	0	0.00765247	pos
GSE37416_12H_VS_48H_F_TULARENSIS_LVS_NEUTROPHIL_DN	42	2.01715	0	0.00765944	pos
GSE9006_HEALTHY_VS_TYPE_1_DIABETES_PBMC_AT_DX_UP	45	2.0158	0	0.00773067	pos
MODULE_152	32	2.01528	0	0.00778302	pos
GSE46242_CTRL_VS_EGR2_DELETED_ANERGIC_TH1_CD4_TCELL_UP	31	2.01507	0	0.00777912	pos
NABA_ECM_REGULATORS	23	2.0132	0	0.00794824	pos
GO_ENDOTHELIAL_CELL_MIGRATION	32	2.01274	0	0.00798389	pos
ALCALA_APOPTOSIS	23	2.01193	0.00191205	0.00801687	pos
GO_ACTIVATION_OF_IMMUNE_RESPONSE	80	2.01167	0	0.00802299	pos
GSE5542_UNTREATED_VS_IFNG_TREATED_EPITHELIAL_CELLS_24H_UP	36	2.01085	0	0.00806352	pos
GO_PHAGOCYTOSIS	19	2.01034	0	0.00809059	pos
GO_VITAMIN_METABOLIC_PROCESS	25	2.00936	0	0.00816763	pos
GSE37605_C57BL6_VS_NOD_FOXP3_FUSION_GFP_TREG_DN	35	2.00835	0	0.00825251	pos
SMITH_TERT_TARGETS_DN	22	2.00822	0.003861	0.00826096	pos
GO_NEGATIVE_REGULATION_OF_RESPONSE_TO_EXTERNAL_STIMULUS	36	2.00816	0	0.00825631	pos
HAN_SATB1_TARGETS_DN	74	2.00781	0.00200803	0.00827238	pos
GO_RRNA_BINDING	15	2.00766	0.00411523	0.00826502	pos
GSE42021_CD24INT_VS_CD24LOW_TREG_THYMUS_DN	26	2.0073	0	0.00828102	pos
BUYTAERT_PHOTODYNAMIC_THERAPY_STRESS_DN	114	2.00673	0	0.00831003	pos
GRAESSMANN_APOPTOSIS_BY_DOXORUBICIN_UP	196	2.00655	0	0.00830267	pos
GSE26890_CXCR1_NEG_VS_POS_EFFECTOR_CD8_TCELL_DN	35	2.00635	0.00198807	0.00830325	pos
REACTOME_UNFOLDED_PROTEIN_RESPONSE_UPR	17	2.00604	0	0.00831158	pos
GSE5099_DAY3_VS_DAY7_MCSF_TREATED_MACROPHAGE_UP	41	2.00571	0	0.00833773	pos
GSE18791_CTRL_VS_NEWCASTLE_VIRUS_DC_18H_UP	31	2.00551	0	0.00834332	pos
GO_SKELETAL_SYSTEM_DEVELOPMENT	67	2.00412	0	0.00843398	pos
GO_GOLGI_APPARATUS_PART	143	2.00356	0	0.00845477	pos
FEVR_CTNNB1_TARGETS_UP	102	2.00319	0	0.00848307	pos
GSE21546_UNSTIM_VS_ANTI_CD3_STIM_DP_THYMOCYTES_UP	39	2.00286	0	0.00848317	pos
GSE11864_CSF1_IFNG_VS_CSF1_IFNG_PAM3CYS_IN_MAC_UP	37	2.00233	0	0.00851141	pos
GSE17721_LPS_VS_PAM3CSK4_8H_BMDC_UP	38	2.00194	0.00187266	0.00852682	pos
DITTMER_PTHLH_TARGETS_UP	24	2.00187	0	0.00851913	pos
HOXA9_DN.V1_UP	35	2.00147	0	0.00853939	pos
GO_ANTIGEN_PROCESSING_AND_PRESENTATION_OF_PEPTIDE_ANTIGEN	43	2.00099	0.002	0.00854957	pos
GO_INFLAMMATORY_RESPONSE	64	2.00047	0	0.00860015	pos
GSE19198_6H_VS_24H_IL21_TREATED_TCELL_UP	36	2.0004	0	0.00858989	pos
HALLMARK_TNFA_SIGNALING_VIA_NFKB	37	2.00029	0	0.00858218	pos
TONKS_TARGETS_OF_RUNX1_RUNX1T1_FUSION_HSC_UP	31	1.99946	0.00199203	0.0086629	pos
SCHAEFFER_PROSTATE_DEVELOPMENT_12HR_UP	16	1.99929	0.00603622	0.00866021	pos
RAGHAVACHARI_PLATELET_SPECIFIC_GENES	18	1.99892	0.0020284	0.00869504	pos
GO_CARDIOVASCULAR_SYSTEM_DEVELOPMENT	109	1.99875	0	0.00869228	pos
GO_POSITIVE_REGULATION_OF_BINDING	38	1.99866	0.00203252	0.008682	pos
GSE26928_NAIVE_VS_EFF_MEMORY_CD4_TCELL_DN	33	1.99853	0.00199203	0.00867925	pos
GSE23568_CTRL_TRANSDUCED_VS_WT_CD8_TCELL_UP	36	1.99708	0	0.00878588	pos
GSE3982_DC_VS_TH1_UP	37	1.99675	0	0.00879295	pos
REACTOME_DEGRADATION_OF_THE_EXTRACELLULAR_MATRIX	19	1.99619	0	0.00882994	pos
GSE21360_TERTIARY_VS_QUATERNARY_MEMORY_CD8_TCELL_UP	31	1.99597	0	0.00883694	pos
GSE46242_CTRL_VS_EGR2_DELETED_TH1_CD4_TCELL_UP	33	1.99487	0	0.00892828	pos
GSE5503_LIVER_DC_VS_PLN_DC_ACTIVATED_ALLOGENIC_TCELL_UP	22	1.99467	0.00203666	0.0089276	pos
GSE21360_TERTIARY_VS_QUATERNARY_MEMORY_CD8_TCELL_DN	27	1.99421	0	0.00896418	pos
GSE29618_LAIV_VS_TIV_FLU_VACCINE_DAY7_MONOCYTE_DN	31	1.99379	0	0.00898071	pos
GSE45365_HEALTHY_VS_MCMV_INFECTION_CD8A_DC_UP	50	1.99341	0	0.00902418	pos
GNF2_DAP3	31	1.99304	0	0.00906501	pos
GSE40274_FOXP3_VS_FOXP3_AND_EOS_TRANSDUCED_ACTIVATED_CD4_TCELL_UP	36	1.99292	0.00199203	0.00906168	pos
GSE19401_UNSTIM_VS_PAM2CSK4_STIM_FOLLICULAR_DC_DN	35	1.99278	0.00199203	0.00905831	pos
PHONG_TNF_RESPONSE_VIA_P38_PARTIAL	32	1.99131	0.00200401	0.00919894	pos
HOLLMANN_APOPTOSIS_VIA_CD40_UP	47	1.98859	0.0020284	0.00940238	pos
GO_REGULATION_OF_MORPHOGENESIS_OF_AN_EPITHELIUM	36	1.98838	0	0.00940576	pos
GSE12366_GC_VS_NAIVE_BCELL_DN	40	1.98825	0.00198807	0.00940672	pos
GSE12366_GC_BCELL_VS_PLASMA_CELL_DN	33	1.98779	0	0.00944884	pos
GSE34156_NOD2_LIGAND_VS_TLR1_TLR2_LIGAND_6H_TREATED_MONOCYTE_UP	41	1.98771	0.0038835	0.00943761	pos
GSE42021_TCONV_PLN_VS_CD24HI_TCONV_THYMUS_UP	48	1.98686	0	0.00948193	pos
MARKEY_RB1_ACUTE_LOF_DN	34	1.98627	0.00203252	0.00951405	pos
GO_MYELOID_LEUKOCYTE_DIFFERENTIATION	28	1.98522	0	0.0095993	pos
GSE7509_UNSTIM_VS_FCGRIIB_STIM_MONOCYTE_UP	38	1.98516	0.00203666	0.00959277	pos
GSE15930_STIM_VS_STIM_AND_IFNAB_48H_CD8_T_CELL_UP	39	1.98379	0	0.00973029	pos
GSE29614_CTRL_VS_DAY3_TIV_FLU_VACCINE_PBMC_UP	16	1.98345	0	0.00975466	pos
GSE360_DC_VS_MAC_B_MALAYI_HIGH_DOSE_DN	37	1.98215	0	0.00988162	pos
GSE13738_RESTING_VS_TCR_ACTIVATED_CD4_TCELL_DN	41	1.98042	0	0.0100394	pos
KIM_WT1_TARGETS_12HR_DN	37	1.97858	0.00198807	0.0102514	pos
GSE3982_MAST_CELL_VS_MAC_DN	33	1.9784	0	0.0102486	pos
SHETH_LIVER_CANCER_VS_TXNIP_LOSS_PAM1	43	1.97791	0	0.0102934	pos
DANG_REGULATED_BY_MYC_DN	47	1.97772	0	0.0102999	pos
REACTOME_SIGNALING_BY_INTERLEUKINS	101	1.97732	0	0.0103111	pos
GSE9960_HEALTHY_VS_GRAM_NEG_SEPSIS_PBMC_DN	34	1.9759	0	0.0104551	pos
KEGG_CYTOKINE_CYTOKINE_RECEPTOR_INTERACTION	16	1.97548	0.00422833	0.0104708	pos
LIM_MAMMARY_STEM_CELL_DN	66	1.97536	0	0.0104675	pos
GSE24634_IL4_VS_CTRL_TREATED_NAIVE_CD4_TCELL_DAY10_DN	44	1.97506	0	0.0104783	pos
GO_PATTERN_RECOGNITION_RECEPTOR_SIGNALING_PATHWAY	31	1.97453	0.00422833	0.0105338	pos
GSE40274_CTRL_VS_FOXP3_AND_EOS_TRANSDUCED_ACTIVATED_CD4_TCELL_UP	32	1.97262	0.00200401	0.0107317	pos
GSE22196_HEALTHY_VS_OBESE_MOUSE_SKIN_GAMMADELTA_TCELL_DN	33	1.97209	0	0.0107726	pos
GO_RESPIRASOME	31	1.97116	0.00201613	0.0108602	pos
GSE22886_NAIVE_BCELL_VS_BM_PLASMA_CELL_DN	37	1.97114	0.00196078	0.010847	pos
MISSIAGLIA_REGULATED_BY_METHYLATION_UP	25	1.97097	0.00194932	0.0108454	pos
GO_MONOCARBOXYLIC_ACID_METABOLIC_PROCESS	63	1.97083	0	0.0108393	pos
GSE33425_CD161_HIGH_VS_NEG_CD8_TCELL_DN	31	1.97083	0.00199203	0.0108217	pos
HOELZEL_NF1_TARGETS_UP	30	1.97058	0.00395257	0.0108273	pos
GSE23308_WT_VS_MINERALCORTICOID_REC_KO_MACROPHAGE_UP	35	1.97007	0	0.010863	pos
GSE9006_TYPE_1_DIABETES_AT_DX_VS_4MONTH_POST_DX_PBMC_UP	30	1.96965	0	0.0108822	pos
MORF_DAP3	47	1.9695	0	0.0108831	pos
GSE13411_NAIVE_VS_SWITCHED_MEMORY_BCELL_DN	45	1.96931	0.00198807	0.0108907	pos
BILANGES_RAPAMYCIN_SENSITIVE_VIA_TSC1_AND_TSC2	16	1.96795	0	0.0110065	pos
GO_ENDOSOMAL_PART	78	1.96737	0	0.0110439	pos
GO_PROTEIN_LOCALIZATION_TO_PLASMA_MEMBRANE	48	1.96709	0	0.0110468	pos
GSE11961_FOLLICULAR_BCELL_VS_MARGINAL_ZONE_BCELL_DN	27	1.967	0.0021322	0.0110382	pos
GSE20727_CTRL_VS_ROS_INHIBITOR_TREATED_DC_DN	43	1.96677	0	0.0110342	pos
GSE36078_WT_VS_IL1R_KO_LUNG_DC_AFTER_AD5_T425A_HEXON_INF_DN	44	1.96664	0.0019685	0.0110393	pos
MOOTHA_VOXPHOS	25	1.96651	0.00193424	0.0110375	pos
GO_LYSOSOMAL_LUMEN	22	1.96582	0	0.011072	pos
GO_COENZYME_BINDING	65	1.96551	0	0.0110951	pos
GO_LIPID_BINDING	114	1.96445	0	0.0112157	pos
GSE46242_TH1_VS_ANERGIC_TH1_CD4_TCELL_UP	40	1.96321	0	0.0113516	pos
GO_PHOSPHATIDYLINOSITOL_BINDING	47	1.96305	0	0.0113494	pos
GO_TRANSLATIONAL_INITIATION	65	1.963	0	0.0113336	pos
GSE10325_CD4_TCELL_VS_LUPUS_CD4_TCELL_DN	40	1.96246	0	0.0113607	pos
GSE36826_WT_VS_IL1R_KO_SKIN_STAPH_AUREUS_INF_UP	44	1.96245	0	0.0113473	pos
GSE29618_PDC_VS_MDC_DAY7_FLU_VACCINE_UP	33	1.96164	0.00207039	0.0114548	pos
GSE3720_UNSTIM_VS_PMA_STIM_VD2_GAMMADELTA_TCELL_UP	39	1.96127	0	0.0114726	pos
GSE37605_FOXP3_FUSION_GFP_VS_IRES_GFP_TREG_C57BL6_UP	24	1.96068	0	0.0115241	pos
KONDO_EZH2_TARGETS	45	1.96034	0	0.011544	pos
GSE41176_WT_VS_TAK1_KO_ANTI_IGM_STIM_BCELL_3H_DN	34	1.96001	0.00204918	0.0115595	pos
GSE17721_CTRL_VS_POLYIC_6H_BMDC_UP	45	1.95954	0	0.0115992	pos
GO_PROTEIN_LOCALIZATION_TO_CELL_PERIPHERY	56	1.95949	0.00193424	0.01159	pos
GSE43955_10H_VS_60H_ACT_CD4_TCELL_WITH_TGFB_IL6_DN	33	1.95791	0	0.011767	pos
GO_REGULATION_OF_IMMUNE_RESPONSE	128	1.95726	0	0.0118264	pos
GO_CELL_ACTIVATION	168	1.95616	0	0.0119364	pos
GSE1460_DP_THYMOCYTE_VS_NAIVE_CD4_TCELL_CORD_BLOOD_DN	24	1.95582	0	0.0119708	pos
GSE2585_THYMIC_MACROPHAGE_VS_MTEC_UP	31	1.95561	0.00204499	0.011972	pos
KOINUMA_TARGETS_OF_SMAD2_OR_SMAD3	160	1.95397	0	0.0121626	pos
JIANG_HYPOXIA_NORMAL	34	1.95353	0	0.0121878	pos
MODULE_24	45	1.95339	0.00201613	0.0121976	pos
GSE5455_HEALTHY_VS_TUMOR_BEARING_MOUSE_SPLEEN_MONOCYTE_DN	35	1.95338	0	0.0121788	pos
GSE13411_NAIVE_VS_IGM_MEMORY_BCELL_DN	43	1.9533	0.00201207	0.0121687	pos
GO_CYTOKINE_MEDIATED_SIGNALING_PATHWAY	94	1.95322	0	0.0121522	pos
GO_POSITIVE_REGULATION_OF_RESPONSE_TO_EXTERNAL_STIMULUS	30	1.95292	0	0.0121772	pos
GSE17186_MEMORY_VS_CD21HIGH_TRANSITIONAL_BCELL_DN	40	1.95288	0	0.0121607	pos
GO_I_KAPPAB_KINASE_NF_KAPPAB_SIGNALING	38	1.95273	0.00197628	0.0121595	pos
GO_COAGULATION	35	1.95184	0	0.0122498	pos
REACTOME_PROTEIN_LOCALIZATION	25	1.95171	0	0.0122463	pos
MORF_EIF3S6	33	1.95143	0	0.0122558	pos
GO_VACUOLAR_MEMBRANE	59	1.9512	0	0.0122696	pos
GSE30971_CTRL_VS_LPS_STIM_MACROPHAGE_WBP7_HET_2H_UP	34	1.95111	0.00197239	0.0122683	pos
GO_ANTIGEN_PROCESSING_AND_PRESENTATION_OF_PEPTIDE_ANTIGEN_VIA_MHC_CLASS_I	20	1.94905	0	0.0124913	pos
PXR_Q2	46	1.94848	0	0.0125306	pos
GO_STRUCTURAL_MOLECULE_ACTIVITY	132	1.9483	0	0.0125225	pos
MODULE_1	56	1.94807	0.00196078	0.0125315	pos
GSE17721_LPS_VS_GARDIQUIMOD_2H_BMDC_UP	35	1.94776	0	0.012547	pos
REACTOME_ADAPTIVE_IMMUNE_SYSTEM	122	1.94772	0	0.0125366	pos
PASINI_SUZ12_TARGETS_DN	64	1.9474	0	0.0125628	pos
GSE13484_UNSTIM_VS_12H_YF17D_VACCINE_STIM_PBMC_DN	38	1.94718	0	0.0125739	pos
GSE2770_TGFB_AND_IL4_VS_IL4_TREATED_ACT_CD4_TCELL_48H_DN	43	1.94714	0	0.0125593	pos
GSE25123_WT_VS_PPARG_KO_MACROPHAGE_UP	25	1.94709	0.00619835	0.0125469	pos
GSE5589_WT_VS_IL10_KO_LPS_AND_IL10_STIM_MACROPHAGE_45MIN_DN	40	1.9466	0.00195695	0.012577	pos
GSE6269_HEALTHY_VS_FLU_INF_PBMC_DN	22	1.9464	0	0.0125709	pos
GSE24634_TEFF_VS_TCONV_DAY10_IN_CULTURE_DN	42	1.94632	0.00198413	0.0125586	pos
GSE13411_PLASMA_CELL_VS_MEMORY_BCELL_UP	27	1.94608	0	0.0125653	pos
ALCALAY_AML_BY_NPM1_LOCALIZATION_DN	32	1.94556	0.00198807	0.0126122	pos
GO_ORGANIC_ACID_CATABOLIC_PROCESS	38	1.94541	0	0.0126209	pos
GSE36527_CD69_NEG_VS_POS_TREG_CD62L_LOS_KLRG1_NEG_UP	40	1.94518	0.00413223	0.0126212	pos
GSE20727_CTRL_VS_DNFB_ALLERGEN_TREATED_DC_DN	41	1.94469	0.00568182	0.0126803	pos
GO_COFACTOR_METABOLIC_PROCESS	77	1.9444	0	0.0126994	pos
GO_REGULATION_OF_CELLULAR_PROTEIN_CATABOLIC_PROCESS	50	1.94373	0	0.0127519	pos
MODULE_3	64	1.94361	0	0.0127457	pos
GO_REGULATION_OF_RESPONSE_TO_EXTERNAL_STIMULUS	85	1.94304	0	0.0128082	pos
GSE18804_SPLEEN_MACROPHAGE_VS_TUMORAL_MACROPHAGE_DN	43	1.94222	0	0.0128961	pos
TONKS_TARGETS_OF_RUNX1_RUNX1T1_FUSION_ERYTHROCYTE_UP	25	1.94121	0.00199601	0.0130167	pos
KAECH_NAIVE_VS_MEMORY_CD8_TCELL_DN	30	1.94087	0.00392927	0.013062	pos
GSE19941_IL10_KO_VS_IL10_KO_AND_NFKBP50_KO_LPS_AND_IL10_STIM_MACROPHAGE_UP	33	1.94074	0	0.0130492	pos
GSE17721_LPS_VS_GARDIQUIMOD_8H_BMDC_UP	44	1.94017	0	0.0131068	pos
GSE32423_CTRL_VS_IL7_IL4_MEMORY_CD8_TCELL_DN	36	1.93868	0.00197628	0.0132994	pos
GO_REGULATION_OF_RESPONSE_TO_WOUNDING	16	1.93846	0.00193424	0.0133027	pos
GSE22886_NEUTROPHIL_VS_DC_DN	59	1.93832	0.00202429	0.0133	pos
GO_TRANSPORT_VESICLE	65	1.93824	0	0.0132848	pos
SERVITJA_LIVER_HNF1A_TARGETS_UP	16	1.93767	0	0.0133397	pos
GO_SULFUR_COMPOUND_METABOLIC_PROCESS	28	1.93735	0	0.013374	pos
GO_ENZYME_INHIBITOR_ACTIVITY	33	1.93727	0.00408998	0.0133629	pos
MORF_PRKAR1A	42	1.93711	0	0.0133601	pos
GSE1432_CTRL_VS_IFNG_24H_MICROGLIA_DN	44	1.93699	0	0.0133551	pos
MORF_BAG5	15	1.93629	0.00601202	0.01342	pos
GSE2935_UV_INACTIVATED_VS_LIVE_SENDAI_VIRUS_INF_MACROPHAGE_DN	19	1.93542	0.0038835	0.0135009	pos
KRIEG_HYPOXIA_NOT_VIA_KDM3A	140	1.93528	0	0.0134998	pos
HALLMARK_HYPOXIA	41	1.93525	0	0.0134845	pos
GSE7218_UNSTIM_VS_ANTIGEN_STIM_THROUGH_IGG_BCELL_DN	22	1.93525	0	0.0134652	pos
REACTOME_ANTIGEN_PROCESSING_CROSS_PRESENTATION	20	1.93506	0.00212314	0.0134703	pos
GSE29618_PDC_VS_MDC_DN	27	1.9344	0.0020202	0.0135342	pos
GSE45382_UNTREATED_VS_TGFB_TREATED_MACROPHAGES_UP	46	1.93337	0	0.0136302	pos
BYSTRYKH_HEMATOPOIESIS_STEM_CELL_QTL_CIS	22	1.93315	0.00386847	0.0136452	pos
GO_SMALL_MOLECULE_CATABOLIC_PROCESS	57	1.93282	0.00381679	0.0136644	pos
NABA_ECM_GLYCOPROTEINS	19	1.93221	0	0.0137417	pos
GNF2_FBL	50	1.93148	0	0.0138492	pos
KESHELAVA_MULTIPLE_DRUG_RESISTANCE	19	1.93012	0	0.0140163	pos
GSE46606_IRF4MID_VS_WT_CD40L_IL2_IL5_DAY3_STIMULATED_BCELL_DN	36	1.92976	0	0.0140488	pos
GO_PHOSPHATIDYLINOSITOL_BISPHOSPHATE_BINDING	25	1.92964	0.00400802	0.0140549	pos
GSE43863_NAIVE_VS_TFH_CD4_EFF_TCELL_D6_LCMV_UP	40	1.92885	0.00204499	0.0141413	pos
GO_PERINUCLEAR_REGION_OF_CYTOPLASM	108	1.92856	0	0.0141534	pos
GSE29618_PDC_VS_MDC_UP	26	1.92779	0	0.0142294	pos
LEF1_UP.V1_UP	18	1.92747	0.00194175	0.0142573	pos
PELLICCIOTTA_HDAC_IN_ANTIGEN_PRESENTATION_DN	16	1.92694	0.00804829	0.014315	pos
GSE45739_UNSTIM_VS_ACD3_ACD28_STIM_NRAS_KO_CD4_TCELL_DN	25	1.92666	0.00598802	0.0143447	pos
GSE17186_CD21LOW_VS_CD21HIGH_TRANSITIONAL_BCELL_CORD_BLOOD_DN	47	1.92522	0	0.0145155	pos
GSE22886_UNSTIM_VS_STIM_MEMORY_TCELL_UP	39	1.92501	0	0.0145269	pos
PHONG_TNF_RESPONSE_NOT_VIA_P38	60	1.92481	0	0.0145245	pos
AP1FJ_Q2	47	1.9248	0.0020284	0.0145043	pos
GSE37605_FOXP3_FUSION_GFP_VS_IRES_GFP_TREG_NOD_UP	40	1.92449	0	0.0145217	pos
GO_REGULATION_OF_INFLAMMATORY_RESPONSE	35	1.92448	0	0.0145015	pos
GSE19888_CTRL_VS_A3R_ACTIVATION_MAST_CELL_DN	22	1.92382	0.00393701	0.0145642	pos
BOQUEST_STEM_CELL_CULTURED_VS_FRESH_UP	78	1.92288	0.00204918	0.0146718	pos
GSE5589_LPS_VS_LPS_AND_IL10_STIM_MACROPHAGE_45MIN_UP	41	1.92227	0.00591716	0.014734	pos
GSE34515_CD16_NEG_MONOCYTE_VS_DC_UP	26	1.92195	0	0.0147547	pos
GSE2405_HEAT_KILLED_LYSATE_VS_LIVE_A_PHAGOCYTOPHILUM_STIM_NEUTROPHIL_24H_UP	28	1.92178	0.00393701	0.014752	pos
GSE32986_GMCSF_VS_GMCSF_AND_CURDLAN_LOWDOSE_STIM_DC_UP	49	1.92152	0.0019084	0.0147805	pos
SHAFFER_IRF4_TARGETS_IN_MYELOMA_VS_MATURE_B_LYMPHOCYTE	19	1.92139	0.00380228	0.0147719	pos
HELLER_SILENCED_BY_METHYLATION_UP	39	1.92053	0	0.0148803	pos
LU_IL4_SIGNALING	22	1.91989	0	0.0149493	pos
GO_COATED_MEMBRANE	25	1.91971	0	0.0149542	pos
GCM_PSME1	22	1.9195	0.00790514	0.014957	pos
SASSON_RESPONSE_TO_GONADOTROPHINS_DN	22	1.9193	0.0020284	0.0149774	pos
GO_SMOOTH_MUSCLE_CELL_PROLIFERATION	18	1.91908	0.00764818	0.0149802	pos
GROSS_HYPOXIA_VIA_ELK3_DN	24	1.91896	0	0.0149714	pos
GO_POSITIVE_REGULATION_OF_DEFENSE_RESPONSE	71	1.91852	0	0.0149996	pos
GO_VESICLE_MEMBRANE	116	1.9184	0	0.0150081	pos
GSE3982_CTRL_VS_LPS_4H_MAC_DN	39	1.91804	0.00400802	0.0150438	pos
GO_OXIDOREDUCTASE_ACTIVITY	131	1.91794	0	0.0150331	pos
MEF2_01	16	1.91746	0.00598802	0.0150898	pos
GSE37301_PRO_BCELL_VS_RAG2_KO_NK_CELL_UP	36	1.91687	0.00406504	0.0151613	pos
GSE26030_TH1_VS_TH17_DAY5_POST_POLARIZATION_DN	35	1.91652	0.00208333	0.0152003	pos
GSE20715_WT_VS_TLR4_KO_24H_OZONE_LUNG_UP	39	1.91619	0.0020202	0.0152144	pos
GSE36888_UNTREATED_VS_IL2_TREATED_STAT5_AB_KNOCKIN_TCELL_2H_UP	31	1.9161	0.002	0.0152111	pos
VERHAAK_GLIOBLASTOMA_CLASSICAL	28	1.91577	0	0.0152423	pos
MARTINEZ_RB1_TARGETS_DN	85	1.91575	0	0.0152257	pos
GGAANCGGAANY_UNKNOWN	23	1.91559	0.00622407	0.015232	pos
GSE6092_IFNG_VS_IFNG_AND_B_BURGDORFERI_INF_ENDOTHELIAL_CELL_DN	40	1.91508	0	0.0152876	pos
ELF1_Q6	41	1.91481	0	0.0153053	pos
GO_RESPONSE_TO_OXYGEN_LEVELS	68	1.91456	0	0.0153208	pos
GSE2770_TGFB_AND_IL4_ACT_VS_ACT_CD4_TCELL_48H_UP	40	1.91307	0.00408163	0.0155541	pos
ESC_V6.5_UP_EARLY.V1_DN	16	1.91221	0	0.0156525	pos
DER_IFN_ALPHA_RESPONSE_UP	16	1.91148	0	0.0157372	pos
GSE19198_1H_VS_6H_IL21_TREATED_TCELL_DN	27	1.91136	0	0.0157333	pos
GSE7831_1H_VS_4H_CPG_STIM_PDC_UP	36	1.91114	0	0.0157389	pos
GSE22935_UNSTIM_VS_24H_MBOVIS_BCG_STIM_MACROPHAGE_UP	39	1.91103	0.00201207	0.0157388	pos
GSE8678_IL7R_LOW_VS_HIGH_EFF_CD8_TCELL_UP	29	1.911	0	0.0157199	pos
GSE39820_TGFBETA1_VS_TGFBETA3_IN_IL6_TREATED_CD4_TCELL_DN	29	1.90969	0.00198413	0.0159283	pos
GSE360_HIGH_DOSE_B_MALAYI_VS_M_TUBERCULOSIS_DC_DN	40	1.9095	0	0.0159411	pos
GO_GROWTH_FACTOR_RECEPTOR_BINDING	16	1.90834	0.00202429	0.016109	pos
MOOTHA_PGC	82	1.90723	0	0.0162597	pos
WINTER_HYPOXIA_UP	17	1.90683	0.00959693	0.0163038	pos
YAMAZAKI_TCEB3_TARGETS_UP	33	1.9066	0	0.0163158	pos
KAAB_HEART_ATRIUM_VS_VENTRICLE_DN	47	1.90638	0	0.0163299	pos
GO_TUMOR_NECROSIS_FACTOR_MEDIATED_SIGNALING_PATHWAY	24	1.90571	0	0.0164179	pos
GSE37534_UNTREATED_VS_GW1929_TREATED_CD4_TCELL_PPARG1_AND_FOXP3_TRASDUCED_UP	28	1.9053	0	0.0164485	pos
GAUSSMANN_MLL_AF4_FUSION_TARGETS_E_UP	16	1.90516	0.0019802	0.0164568	pos
GO_WHOLE_MEMBRANE	249	1.9047	0	0.0164911	pos
GSE17721_0.5H_VS_8H_GARDIQUIMOD_BMDC_UP	37	1.90453	0.00410678	0.0164937	pos
GO_IMMUNE_RESPONSE_REGULATING_SIGNALING_PATHWAY	82	1.90438	0	0.0164853	pos
GSE2770_UNTREATED_VS_ACT_CD4_TCELL_2H_UP	30	1.90432	0	0.0164731	pos
REACTOME_DISEASE	225	1.90296	0	0.0166725	pos
GSE9988_LPS_VS_CTRL_TREATED_MONOCYTE_DN	42	1.90203	0	0.0167648	pos
GSE41176_UNSTIM_VS_ANTI_IGM_STIM_BCELL_3H_UP	27	1.90182	0.00397614	0.0167578	pos
GO_FATTY_ACID_METABOLIC_PROCESS	34	1.90168	0	0.0167619	pos
GSE7509_DC_VS_MONOCYTE_DN	34	1.90161	0	0.0167495	pos
GSE3982_EOSINOPHIL_VS_BASOPHIL_DN	51	1.90134	0	0.0167683	pos
GSE27670_BLIMP1_VS_LMP1_TRANSDUCED_GC_BCELL_UP	25	1.90124	0	0.016765	pos
GSE34515_CD16_NEG_VS_POS_MONOCYTE_DN	40	1.90118	0	0.0167527	pos
GO_PROTEOGLYCAN_BIOSYNTHETIC_PROCESS	15	1.9011	0.00422833	0.0167421	pos
GSE40277_GATA1_AND_SATB1_TRANSDUCED_VS_CTRL_CD4_TCELL_UP	33	1.90039	0.00564972	0.0168568	pos
GSE44649_NAIVE_VS_ACTIVATED_CD8_TCELL_UP	37	1.89931	0.00195695	0.0169917	pos
GSE45365_WT_VS_IFNAR_KO_CD8A_DC_UP	51	1.89911	0.00399202	0.0170044	pos
ETS1_B	50	1.8991	0.002	0.0169846	pos
GO_CELLULAR_AMIDE_METABOLIC_PROCESS	206	1.89903	0	0.0169684	pos
GO_MORPHOGENESIS_OF_AN_EPITHELIUM	91	1.89864	0	0.0170156	pos
GSE17721_12H_VS_24H_CPG_BMDC_UP	26	1.89853	0.002	0.0170193	pos
GO_NEGATIVE_REGULATION_OF_DEFENSE_RESPONSE	24	1.8985	0.00203666	0.0170014	pos
GSE20500_RETINOIC_ACID_VS_RARA_ANTAGONIST_TREATED_CD4_TCELL_DN	44	1.8982	0	0.0170284	pos
GSE4748_CTRL_VS_LPS_STIM_DC_3H_UP	35	1.89724	0.00208333	0.0171706	pos
GSE43955_10H_VS_30H_ACT_CD4_TCELL_WITH_TGFB_IL6_UP	32	1.89668	0.00189394	0.0172478	pos
MODULE_45	54	1.89663	0	0.0172386	pos
ESC_J1_UP_LATE.V1_UP	24	1.89595	0.00575816	0.0173243	pos
MORF_DAP	25	1.89574	0.00199203	0.0173455	pos
MORF_PSMC1	55	1.89523	0	0.0174183	pos
GROSS_HYPOXIA_VIA_ELK3_AND_HIF1A_UP	26	1.89519	0.00804829	0.0173982	pos
GO_POSITIVE_REGULATION_OF_CELL_ADHESION	41	1.895	0	0.0174085	pos
GSE22886_DAY0_VS_DAY1_MONOCYTE_IN_CULTURE_UP	42	1.89497	0	0.0173938	pos
GSE3039_CD4_TCELL_VS_ALPHABETA_CD8_TCELL_UP	37	1.89427	0.00583658	0.0174611	pos
GSE33292_DN3_THYMOCYTE_VS_TCF1_KO_TCELL_LYMPHOMA_UP	29	1.89399	0.00208333	0.0174765	pos
GSE19923_E2A_KO_VS_E2A_AND_HEB_KO_DP_THYMOCYTE_DN	37	1.89287	0.00411523	0.0176606	pos
MARTINEZ_TP53_TARGETS_UP	107	1.89276	0	0.017667	pos
GSE3400_UNTREATED_VS_IFNB_TREATED_MEF_DN	31	1.89236	0.00617284	0.0177037	pos
GO_POSITIVE_REGULATION_OF_LOCOMOTION	76	1.89207	0	0.0177241	pos
HOSHIDA_LIVER_CANCER_SUBCLASS_S3	42	1.89067	0.00407332	0.0179348	pos
GSE25123_CTRL_VS_IL4_STIM_MACROPHAGE_UP	49	1.89065	0.0020202	0.0179161	pos
GSE17974_0.5H_VS_72H_IL4_AND_ANTI_IL12_ACT_CD4_TCELL_DN	45	1.89063	0	0.0178957	pos
GSE24210_TCONV_VS_TREG_DN	43	1.89051	0.00205339	0.0178912	pos
GSE18281_CORTEX_VS_MEDULLA_THYMUS_DN	28	1.88967	0.00201613	0.0180218	pos
GO_NEGATIVE_REGULATION_OF_RESPONSE_TO_STIMULUS	233	1.88963	0	0.0180031	pos
GSE39110_DAY3_VS_DAY6_POST_IMMUNIZATION_CD8_TCELL_WITH_IL2_TREATMENT_DN	32	1.88952	0	0.0179948	pos
GO_POSITIVE_REGULATION_OF_HEMOPOIESIS	27	1.88945	0.00203252	0.0179902	pos
GU_PDEF_TARGETS_UP	15	1.88923	0.01002	0.0180189	pos
GO_ATP_SYNTHESIS_COUPLED_ELECTRON_TRANSPORT	26	1.88906	0.00197239	0.0180333	pos
GO_MICROBODY	21	1.88896	0.00408998	0.0180356	pos
GO_ENDOCYTOSIS	85	1.88878	0	0.0180483	pos
GSE11057_NAIVE_VS_EFF_MEMORY_CD4_TCELL_DN	33	1.8887	0.00407332	0.0180366	pos
HALLMARK_FATTY_ACID_METABOLISM	33	1.88853	0	0.0180407	pos
GSE36888_UNTREATED_VS_IL2_TREATED_TCELL_17H_UP	44	1.88821	0.00204918	0.0180726	pos
GO_CELLULAR_CARBOHYDRATE_METABOLIC_PROCESS	44	1.88768	0.00406504	0.0181528	pos
GO_POSITIVE_REGULATION_OF_PROTEIN_METABOLIC_PROCESS	251	1.88763	0	0.0181393	pos
GSE22886_NAIVE_CD8_TCELL_VS_MONOCYTE_DN	29	1.88708	0.004158	0.0182054	pos
GSE27786_BCELL_VS_NEUTROPHIL_DN	31	1.88679	0.00195312	0.018223	pos
GSE11961_MARGINAL_ZONE_BCELL_VS_MEMORY_BCELL_DAY40_UP	33	1.88623	0	0.0183029	pos
GSE360_T_GONDII_VS_B_MALAYI_LOW_DOSE_DC_DN	35	1.8861	0	0.0183031	pos
KYNG_WERNER_SYNDROM_AND_NORMAL_AGING_DN	38	1.88608	0.00589391	0.0182827	pos
GO_INTEGRIN_BINDING	20	1.88593	0.00582524	0.0182761	pos
GO_SIGNALING_RECEPTOR_BINDING	187	1.88589	0	0.0182609	pos
GSE7509_DC_VS_MONOCYTE_UP	36	1.88539	0	0.018328	pos
GSE16697_CD4_TCELL_VS_TFH_CD4_TCELL_UP	44	1.88533	0.00406504	0.0183197	pos
REACTOME_MHC_CLASS_II_ANTIGEN_PRESENTATION	26	1.88528	0.00756144	0.0183061	pos
GSE37533_UNTREATED_VS_PIOGLIZATONE_TREATED_CD4_TCELL_PPARG1_AND_FOXP3_TRASDUCED_UP	23	1.88527	0	0.0182841	pos
RHEIN_ALL_GLUCOCORTICOID_THERAPY_DN	88	1.88436	0	0.0184107	pos
GO_NEGATIVE_REGULATION_OF_INFLAMMATORY_RESPONSE	15	1.88404	0.00401606	0.0184398	pos
GO_OXIDATIVE_PHOSPHORYLATION	36	1.88371	0	0.0184774	pos
GSE24671_CTRL_VS_BAKIMULC_INFECTED_MOUSE_SPLENOCYTES_DN	30	1.88351	0.0020284	0.0184928	pos
GSE45365_NK_CELL_VS_CD8_TCELL_MCMV_INFECTION_DN	40	1.88312	0.00199601	0.0185675	pos
GO_VACUOLE_ORGANIZATION	25	1.88289	0.00763359	0.0185911	pos
GO_INTERSPECIES_INTERACTION_BETWEEN_ORGANISMS	185	1.88276	0	0.0185911	pos
GSE21546_ELK1_KO_VS_SAP1A_KO_AND_ELK1_KO_DP_THYMOCYTES_UP	31	1.88252	0.0020202	0.0186182	pos
KEGG_JAK_STAT_SIGNALING_PATHWAY	20	1.88236	0.0121704	0.0186316	pos
GSE25088_CTRL_VS_IL4_STIM_STAT6_KO_MACROPHAGE_DN	28	1.88198	0.00831601	0.018682	pos
BOQUEST_STEM_CELL_DN	26	1.88163	0.00612245	0.0187104	pos
HALLMARK_EPITHELIAL_MESENCHYMAL_TRANSITION	27	1.88149	0.00391389	0.0187034	pos
LINDGREN_BLADDER_CANCER_CLUSTER_2B	57	1.88142	0	0.0186947	pos
GO_POSITIVE_REGULATION_OF_CELL_CELL_ADHESION	23	1.88017	0.00414079	0.0189064	pos
SMIRNOV_RESPONSE_TO_IR_6HR_UP	39	1.87983	0.00210526	0.0189093	pos
GSE21063_CTRL_VS_ANTI_IGM_STIM_BCELL_NFATC1_KO_16H_UP	30	1.87975	0.00194175	0.0189038	pos
GO_POSITIVE_REGULATION_OF_PEPTIDASE_ACTIVITY	31	1.87956	0.00209644	0.0189168	pos
GSE25088_IL4_VS_IL4_AND_ROSIGLITAZONE_STIM_STAT6_KO_MACROPHAGE_DAY10_DN	27	1.879	0.00386847	0.0189847	pos
GO_PEPTIDASE_REGULATOR_ACTIVITY	15	1.87843	0.00387597	0.0190608	pos
GSE22886_NAIVE_TCELL_VS_DC_DN	46	1.87793	0.00197628	0.0191087	pos
GSE3982_EOSINOPHIL_VS_CENT_MEMORY_CD4_TCELL_UP	38	1.87787	0.00223214	0.0190962	pos
GSE18893_CTRL_VS_TNF_TREATED_TCONV_2H_UP	32	1.87756	0.00194175	0.0191387	pos
MORF_RAB1A	44	1.87719	0.00395257	0.0191864	pos
MORF_ANP32B	55	1.87606	0.00188679	0.0193531	pos
SPIELMAN_LYMPHOBLAST_EUROPEAN_VS_ASIAN_UP	80	1.87501	0	0.0194995	pos
GO_POSITIVE_REGULATION_OF_IMMUNE_RESPONSE	106	1.87478	0	0.0195166	pos
GO_PLATELET_DEGRANULATION	18	1.87408	0.00392927	0.0196112	pos
GSE9650_NAIVE_VS_EFF_CD8_TCELL_DN	32	1.87402	0.00384615	0.0196018	pos
GO_MORPHOGENESIS_OF_A_POLARIZED_EPITHELIUM	27	1.87349	0.00204082	0.0196632	pos
GO_ORGANONITROGEN_COMPOUND_CATABOLIC_PROCESS	224	1.87348	0	0.019642	pos
GO_PLACENTA_DEVELOPMENT	24	1.87293	0	0.0197364	pos
GSE11057_NAIVE_VS_MEMORY_CD4_TCELL_DN	41	1.87272	0	0.019748	pos
KEGG_FOCAL_ADHESION	36	1.87114	0.00391389	0.0200061	pos
GO_POSITIVE_REGULATION_OF_PROTEIN_BINDING	20	1.87095	0.0019305	0.0200191	pos
GSE36888_UNTREATED_VS_IL2_TREATED_TCELL_2H_DN	33	1.87071	0.0020284	0.0200355	pos
GSE5099_UNSTIM_VS_MCSF_TREATED_MONOCYTE_DAY3_DN	43	1.86977	0	0.020199	pos
GO_GOLGI_APPARATUS	240	1.86939	0	0.0202429	pos
GSE17721_POLYIC_VS_PAM3CSK4_12H_BMDC_UP	36	1.86914	0.0020284	0.0202605	pos
GSE17580_UNINFECTED_VS_S_MANSONI_INF_TREG_DN	33	1.86885	0.00402414	0.0203011	pos
CHR17Q25	29	1.86828	0.00632911	0.0203805	pos
GSE22342_CD11C_HIGH_VS_LOW_DECIDUAL_MACROPHAGES_DN	24	1.8678	0.00776699	0.0204483	pos
GO_REGULATION_OF_RESPONSE_TO_CYTOKINE_STIMULUS	20	1.8676	0.00191571	0.0204574	pos
REACTOME_SIGNALING_BY_RECEPTOR_TYROSINE_KINASES	82	1.86759	0	0.0204357	pos
GSE33424_CD161_INT_VS_NEG_CD8_TCELL_UP	33	1.867	0.00749064	0.0205213	pos
MORF_RAD23A	79	1.8659	0	0.0206571	pos
GO_REGULATION_OF_BLOOD_PRESSURE	17	1.86586	0.00200803	0.0206385	pos
REACTOME_SPHINGOLIPID_METABOLISM	23	1.86574	0.00407332	0.0206409	pos
GSE24634_NAIVE_CD4_TCELL_VS_DAY3_IL4_CONV_TREG_UP	35	1.86556	0.00580271	0.0206529	pos
GSE1791_CTRL_VS_NEUROMEDINU_IN_T_CELL_LINE_0.8H_UP	37	1.86435	0.00621118	0.0208685	pos
GSE10240_CTRL_VS_IL17_STIM_PRIMARY_BRONCHIAL_EPITHELIAL_CELLS_DN	20	1.86427	0.00205761	0.0208593	pos
GSE44955_MCSF_VS_MCSF_AND_IL27_STIM_MACROPHAGE_DN	37	1.86407	0	0.0208759	pos
GSE15735_CTRL_VS_HDAC_INHIBITOR_TREATED_CD4_TCELL_12H_DN	43	1.86366	0	0.0209456	pos
GSE9006_TYPE_1_VS_TYPE_2_DIABETES_PBMC_AT_DX_DN	57	1.86363	0.00191939	0.0209267	pos
GO_ACTIVATION_OF_INNATE_IMMUNE_RESPONSE	49	1.8633	0.00215054	0.020977	pos
GSE369_PRE_VS_POST_IL6_INJECTION_SOCS3_KO_LIVER_DN	29	1.86291	0.003861	0.0210222	pos
GSE33425_CD161_INT_VS_NEG_CD8_TCELL_DN	45	1.86252	0.00200803	0.0210659	pos
GSE18804_SPLEEN_MACROPHAGE_VS_COLON_TUMORAL_MACROPHAGE_UP	28	1.86057	0.00196464	0.021383	pos
GSE29617_CTRL_VS_DAY3_TIV_FLU_VACCINE_PBMC_2008_DN	45	1.8601	0	0.0214405	pos
REACTOME_HEMOSTASIS	86	1.85959	0	0.0215218	pos
GO_RESPONSE_TO_HYDROGEN_PEROXIDE	19	1.85933	0.003861	0.021539	pos
LIM_MAMMARY_LUMINAL_MATURE_DN	15	1.85932	0.0060241	0.0215165	pos
LOPEZ_MBD_TARGETS	175	1.85931	0	0.0214956	pos
GO_PROTEIN_PROCESSING	27	1.85922	0.00383877	0.0214875	pos
GSE24634_IL4_VS_CTRL_TREATED_NAIVE_CD4_TCELL_DAY3_UP	32	1.85917	0.00414079	0.0214715	pos
GSE37301_HEMATOPOIETIC_STEM_CELL_VS_RAG2_KO_NK_CELL_DN	44	1.859	0.00196078	0.021495	pos
CHRXP11	17	1.8588	0.00984252	0.0215172	pos
GSE42021_CD24HI_VS_CD24LOW_TCONV_THYMUS_UP	36	1.85874	0	0.0215091	pos
MODULE_62	26	1.8586	0.00395257	0.0215151	pos
GSE17721_ALL_VS_24H_PAM3CSK4_BMDC_UP	32	1.85837	0.00609756	0.0215386	pos
GSE7509_UNSTIM_VS_IFNA_STIM_IMMATURE_DC_DN	22	1.85827	0.00990099	0.0215242	pos
GSE3982_CTRL_VS_LPS_48H_DC_DN	33	1.85819	0.00793651	0.0215192	pos
GSE21927_BALBC_VS_C57BL6_MONOCYTE_TUMOR_UP	40	1.85767	0.00603622	0.0215944	pos
VART_KSHV_INFECTION_ANGIOGENIC_MARKERS_UP	17	1.85761	0.00747664	0.0215784	pos
ETS2_B	38	1.85748	0	0.021575	pos
GSE37534_GW1929_VS_PIOGLITAZONE_TREATED_CD4_TCELL_PPARG1_FOXP3_TRANSDUCED_UP	19	1.85729	0.00208768	0.0215966	pos
GSE37534_UNTREATED_VS_ROSIGLITAZONE_TREATED_CD4_TCELL_PPARG1_AND_FOXP3_TRASDUCED_DN	41	1.8571	0.00200803	0.0216198	pos
GO_RESPIRATORY_CHAIN_COMPLEX	26	1.85703	0.00408998	0.0216071	pos
GO_STRESS_ACTIVATED_PROTEIN_KINASE_SIGNALING_CASCADE	56	1.85657	0	0.0216725	pos
GO_REGULATION_OF_INNATE_IMMUNE_RESPONSE	68	1.85522	0	0.021931	pos
GSE12845_IGD_NEG_BLOOD_VS_NAIVE_TONSIL_BCELL_UP	46	1.85519	0.00377358	0.0219132	pos
GSE43260_BTLA_POS_VS_NEG_INTRATUMORAL_CD8_TCELL_UP	63	1.85454	0	0.0220307	pos
GO_MITOCHONDRIAL_PROTEIN_COMPLEX	52	1.85361	0.00199203	0.0222151	pos
GSE1791_CTRL_VS_NEUROMEDINU_IN_T_CELL_LINE_12H_DN	31	1.85348	0	0.0222141	pos
WONG_ADULT_TISSUE_STEM_MODULE	110	1.85328	0	0.0222178	pos
GO_ENDOPEPTIDASE_ACTIVITY	46	1.85323	0.0020284	0.0222075	pos
GSE4984_UNTREATED_VS_VEHICLE_CTRL_TREATED_DC_UP	25	1.85317	0.00402414	0.0221957	pos
GO_NUCLEAR_TRANSCRIBED_MRNA_CATABOLIC_PROCESS	60	1.85291	0.002079	0.0222241	pos
GSE17721_12H_VS_24H_LPS_BMDC_UP	41	1.85245	0.00200401	0.0223128	pos
GSE36392_MAC_VS_NEUTROPHIL_IL25_TREATED_LUNG_DN	24	1.85185	0.004	0.0224059	pos
GSE3039_CD4_TCELL_VS_B2_BCELL_UP	33	1.85173	0.00571429	0.0224048	pos
GO_SPROUTING_ANGIOGENESIS	19	1.85139	0.00630252	0.0224527	pos
GO_PHOSPHATIDYLINOSITOL_4_5_BISPHOSPHATE_BINDING	21	1.8509	0.00191939	0.0225453	pos
GSE43955_TH0_VS_TGFB_IL6_IL23_TH17_ACT_CD4_TCELL_60H_UP	27	1.85076	0	0.0225471	pos
GSE7509_FCGRIIB_VS_TNFA_IL1B_IL6_PGE_STIM_DC_UP	52	1.85075	0.00209644	0.0225228	pos
GSE3982_DC_VS_NEUTROPHIL_LPS_STIM_UP	39	1.85055	0.00201207	0.0225478	pos
GSE16385_IFNG_TNF_VS_IL4_STIM_MACROPHAGE_ROSIGLITAZONE_TREATED_DN	49	1.84982	0	0.0226814	pos
KAECH_NAIVE_VS_DAY8_EFF_CD8_TCELL_DN	36	1.84936	0.00203252	0.0227303	pos
YAGI_AML_WITH_11Q23_REARRANGED	69	1.84869	0	0.0228421	pos
WANG_HCP_PROSTATE_CANCER	18	1.84826	0.00585938	0.0229016	pos
GO_POSITIVE_REGULATION_OF_EPITHELIAL_CELL_PROLIFERATION	31	1.84826	0.00395257	0.022877	pos
KEGG_ALZHEIMERS_DISEASE	37	1.84768	0	0.0229865	pos
GSE17721_CTRL_VS_PAM3CSK4_12H_BMDC_UP	38	1.84741	0.00204499	0.0230182	pos
BROWNE_HCMV_INFECTION_48HR_DN	90	1.84677	0	0.0231122	pos
GSE3982_CENT_MEMORY_CD4_TCELL_VS_NKCELL_DN	29	1.84566	0.00804829	0.0233344	pos
MODULE_52	55	1.84556	0.00194553	0.023343	pos
MORF_ATOX1	22	1.84556	0.00410678	0.0233181	pos
GSE16385_ROSIGLITAZONE_VS_UNTREATED_IFNG_TNF_STIM_MACROPHAGE_DN	37	1.84539	0.00589391	0.023319	pos
GSE23502_BM_VS_COLON_TUMOR_MYELOID_DERIVED_SUPPRESSOR_CELL_UP	26	1.84531	0	0.0233109	pos
GSE17721_0.5H_VS_24H_CPG_BMDC_DN	25	1.84473	0.00618557	0.0233891	pos
GAUSSMANN_MLL_AF4_FUSION_TARGETS_F_UP	39	1.84467	0	0.0233703	pos
MASSARWEH_TAMOXIFEN_RESISTANCE_UP	105	1.84451	0	0.0233711	pos
STAT4_01	43	1.844	0.00196078	0.0234444	pos
GO_TUBE_DEVELOPMENT	149	1.84303	0	0.0236139	pos
GSE1460_NAIVE_CD4_TCELL_ADULT_BLOOD_VS_THYMIC_STROMAL_CELL_DN	41	1.84286	0.00392157	0.023628	pos
GSE45365_WT_VS_IFNAR_KO_CD8A_DC_DN	31	1.8428	0.00574713	0.0236136	pos
GSE22886_TCELL_VS_BCELL_NAIVE_UP	32	1.84264	0.00398406	0.0236081	pos
GSE1112_HY_CD8AB_VS_HY_CD8AA_THYMOCYTE_RTOC_CULTURE_UP	39	1.84252	0.003861	0.0236088	pos
MORF_RAB5A	26	1.84214	0.00397614	0.0236709	pos
GSE360_L_DONOVANI_VS_T_GONDII_MAC_DN	23	1.84142	0.0042735	0.0238106	pos
KAAB_HEART_ATRIUM_VS_VENTRICLE_UP	43	1.84141	0	0.0237871	pos
GSE17721_0.5H_VS_24H_PAM3CSK4_BMDC_UP	34	1.84126	0.00391389	0.023798	pos
GSE3982_EOSINOPHIL_VS_EFF_MEMORY_CD4_TCELL_DN	39	1.84117	0.00393701	0.0237954	pos
GSE34156_UNTREATED_VS_24H_NOD2_LIGAND_TREATED_MONOCYTE_DN	29	1.8411	0.00385356	0.0237869	pos
GO_PHOSPHOLIPID_BINDING	76	1.84105	0.00199601	0.023777	pos
GSE27786_CD8_TCELL_VS_NKTCELL_DN	30	1.84091	0.00394477	0.0237744	pos
GSE5679_RARA_AGONIST_AM580_VS_AM580_AND_ROSIGLITAZONE_TREATED_DC_DN	32	1.84083	0.00408998	0.023763	pos
MODULE_18	65	1.84062	0	0.0237828	pos
GO_CARTILAGE_DEVELOPMENT	21	1.84036	0.00819672	0.0238215	pos
MODULE_55	73	1.84019	0.00202429	0.0238352	pos
GSE19941_IL10_KO_VS_IL10_KO_AND_NFKBP50_KO_LPS_STIM_MACROPHAGE_DN	36	1.84006	0	0.0238282	pos
NAKAMURA_TUMOR_ZONE_PERIPHERAL_VS_CENTRAL_UP	53	1.83973	0.00197628	0.0238742	pos
GO_MITOCHONDRIAL_MATRIX	94	1.83947	0	0.0238996	pos
GO_INNER_MITOCHONDRIAL_MEMBRANE_PROTEIN_COMPLEX	29	1.83913	0.00585938	0.0239354	pos
GSE6674_ANTI_IGM_VS_PL2_3_STIM_BCELL_UP	42	1.83882	0.00588235	0.0239869	pos
GSE1925_CTRL_VS_3H_IFNG_STIM_IFNG_PRIMED_MACROPHAGE_UP	32	1.8386	0.00606061	0.0240105	pos
GSE6269_HEALTHY_VS_STAPH_AUREUS_INF_PBMC_DN	21	1.83784	0.002079	0.0241355	pos
GO_CARBOHYDRATE_METABOLIC_PROCESS	90	1.8374	0	0.0241826	pos
GSE17721_CTRL_VS_PAM3CSK4_6H_BMDC_UP	45	1.83683	0.0020284	0.0242706	pos
MARTINEZ_RB1_AND_TP53_TARGETS_UP	101	1.83678	0	0.0242514	pos
MIYAGAWA_TARGETS_OF_EWSR1_ETS_FUSIONS_UP	43	1.83666	0	0.0242513	pos
TSENG_IRS1_TARGETS_UP	22	1.83597	0.00396825	0.024377	pos
GO_ENDOTHELIAL_CELL_PROLIFERATION	18	1.83558	0.00193424	0.0244541	pos
GSE19888_CTRL_VS_TCELL_MEMBRANES_ACT_MAST_CELL_PRETREAT_A3R_INH_DN	27	1.83508	0.00627615	0.02454	pos
MORF_ERH	33	1.83444	0.0019802	0.0246694	pos
GSE24142_DN2_VS_DN3_THYMOCYTE_FETAL_UP	32	1.83439	0	0.0246485	pos
KEGG_PEROXISOME	17	1.83424	0.00608519	0.0246567	pos
GSE3982_DC_VS_NEUTROPHIL_UP	35	1.83407	0.00581395	0.0246577	pos
WANG_ESOPHAGUS_CANCER_VS_NORMAL_UP	19	1.83385	0.00397614	0.024676	pos
GO_POSITIVE_REGULATION_OF_ENDOCYTOSIS	17	1.83263	0.00862069	0.0248757	pos
GSE3039_CD4_TCELL_VS_B1_BCELL_UP	38	1.83231	0.00195312	0.0249139	pos
GSE27241_CTRL_VS_DIGOXIN_TREATED_CD4_TCELL_IN_TH17_POLARIZING_CONDITIONS_DN	34	1.83192	0.00603622	0.0249725	pos
GRUETZMANN_PANCREATIC_CANCER_DN	30	1.83156	0.00411523	0.0250237	pos
GSE33424_CD161_HIGH_VS_INT_CD8_TCELL_DN	33	1.83152	0.00787402	0.0250099	pos
GO_NUCLEAR_OUTER_MEMBRANE_ENDOPLASMIC_RETICULUM_MEMBRANE_NETWORK	194	1.8315	0	0.0249932	pos
GSE17721_0.5H_VS_24H_LPS_BMDC_DN	27	1.83126	0.00408163	0.0250212	pos
GSE34006_UNTREATED_VS_A2AR_AGONIST_TREATED_TREG_DN	37	1.83122	0	0.025003	pos
GO_RESPONSE_TO_ENDOPLASMIC_RETICULUM_STRESS	56	1.83116	0.00189394	0.0249907	pos
GO_CELLULAR_LIPID_CATABOLIC_PROCESS	35	1.82978	0.0101626	0.0252285	pos
GO_REGULATION_OF_RESPONSE_TO_STRESS	232	1.82946	0	0.0252819	pos
GSE16522_MEMORY_VS_NAIVE_CD8_TCELL_UP	34	1.82929	0	0.0252909	pos
GO_LIPID_METABOLIC_PROCESS	180	1.82927	0	0.025274	pos
WANG_CISPLATIN_RESPONSE_AND_XPC_DN	38	1.82901	0.00390625	0.0252958	pos
GSE13485_CTRL_VS_DAY3_YF17D_VACCINE_PBMC_DN	38	1.82869	0	0.0253319	pos
GO_ENDOPLASMIC_RETICULUM_UNFOLDED_PROTEIN_RESPONSE	24	1.82866	0.00197628	0.0253164	pos
GSE369_PRE_VS_POST_IL6_INJECTION_SOCS3_KO_LIVER_UP	49	1.82839	0.00383142	0.025348	pos
GSE42088_2H_VS_24H_LEISHMANIA_INF_DC_UP	36	1.82818	0	0.0253582	pos
GSE22886_IGA_VS_IGM_MEMORY_BCELL_UP	28	1.82762	0.012	0.0254663	pos
GO_CELL_JUNCTION_ASSEMBLY	39	1.82758	0.00192678	0.0254451	pos
GSE5589_LPS_VS_LPS_AND_IL10_STIM_MACROPHAGE_45MIN_DN	38	1.82749	0.00198807	0.0254483	pos
GSE36527_CD62L_HIGH_VS_CD62L_LOW_TREG_CD69_NEG_KLRG1_NEG_UP	37	1.82736	0.01	0.0254485	pos
GSE3982_MEMORY_CD4_TCELL_VS_BCELL_DN	42	1.82726	0.00213675	0.0254415	pos
BILANGES_SERUM_AND_RAPAMYCIN_SENSITIVE_GENES	20	1.82658	0.00212766	0.0255352	pos
PELLICCIOTTA_HDAC_IN_ANTIGEN_PRESENTATION_UP	17	1.82657	0.00961539	0.0255154	pos
GSE360_CTRL_VS_M_TUBERCULOSIS_DC_DN	33	1.8263	0	0.0255451	pos
GSE2770_UNTREATED_VS_IL12_TREATED_ACT_CD4_TCELL_2H_UP	37	1.82548	0	0.0256906	pos
GO_MITOCHONDRIAL_PART	202	1.8253	0	0.0256989	pos
MORF_PPP2R4	16	1.82483	0.00406504	0.0257849	pos
GO_RECEPTOR_MEDIATED_ENDOCYTOSIS	50	1.82462	0	0.0258073	pos
GO_PEROXISOME_ORGANIZATION	16	1.82453	0	0.0258058	pos
GO_GLYCOSAMINOGLYCAN_BINDING	22	1.82442	0.00384615	0.0258028	pos
REACTOME_INTRA_GOLGI_AND_RETROGRADE_GOLGI_TO_ER_TRAFFIC	43	1.82426	0.00201207	0.0258026	pos
GSE21927_SPLEEN_C57BL6_VS_4T1_TUMOR_BALBC_MONOCYTES_UP	49	1.82363	0.00413223	0.025923	pos
RYTTCCTG_ETS2_B	164	1.82307	0	0.0260279	pos
GSE24081_CONTROLLER_VS_PROGRESSOR_HIV_SPECIFIC_CD8_TCELL_DN	31	1.82305	0.00408998	0.0260051	pos
GSE11864_CSF1_VS_CSF1_IFNG_IN_MAC_DN	35	1.82258	0.00401606	0.0260829	pos
GSE10325_CD4_TCELL_VS_LUPUS_CD4_TCELL_UP	32	1.8216	0.00397614	0.026278	pos
GSE9006_TYPE_1_DIABETES_AT_DX_VS_1MONTH_POST_DX_PBMC_UP	33	1.82149	0.00617284	0.0262747	pos
ACEVEDO_LIVER_TUMOR_VS_NORMAL_ADJACENT_TISSUE_UP	185	1.82147	0	0.0262503	pos
GSE22886_NAIVE_CD4_TCELL_VS_12H_ACT_TH2_UP	44	1.82066	0.00775194	0.0264084	pos
GGGYGTGNY_UNKNOWN	122	1.82012	0	0.0264924	pos
GO_PEROXISOMAL_TRANSPORT	16	1.8201	0.0135922	0.0264707	pos
REACTOME_DEVELOPMENTAL_BIOLOGY	168	1.81962	0	0.0265628	pos
GSE9988_ANTI_TREM1_VS_CTRL_TREATED_MONOCYTES_DN	35	1.8193	0.00609756	0.0266023	pos
UDAYAKUMAR_MED1_TARGETS_DN	43	1.81912	0.00394477	0.0266095	pos
GSE15330_LYMPHOID_MULTIPOTENT_VS_MEGAKARYOCYTE_ERYTHROID_PROGENITOR_IKAROS_KO_DN	22	1.81876	0.00421941	0.0266639	pos
GO_VITAMIN_BINDING	24	1.8184	0.00399202	0.0267293	pos
QI_PLASMACYTOMA_DN	20	1.81767	0.008	0.0268939	pos
ZWANG_CLASS_3_TRANSIENTLY_INDUCED_BY_EGF	39	1.81754	0	0.0268955	pos
MORF_HDAC1	67	1.81734	0.00206186	0.0269233	pos
GSE30971_CTRL_VS_LPS_STIM_MACROPHAGE_WBP7_KO_4H_UP	28	1.81728	0	0.0269096	pos
GSE36891_UNSTIM_VS_PAM_TLR2_STIM_PERITONEAL_MACROPHAGE_DN	40	1.81692	0.00787402	0.0269537	pos
GO_MAMMARY_GLAND_DEVELOPMENT	25	1.81676	0.00386847	0.026958	pos
GSE39382_IL3_VS_IL3_IL33_TREATED_MAST_CELL_UP	32	1.81669	0.00589391	0.0269554	pos
OUELLET_OVARIAN_CANCER_INVASIVE_VS_LMP_UP	30	1.81659	0.0117878	0.0269432	pos
GSE24972_WT_VS_IRF8_KO_MARGINAL_ZONE_SPLEEN_BCELL_UP	43	1.81637	0	0.0269543	pos
GSE3982_DC_VS_MAC_LPS_STIM_DN	28	1.81635	0.0059761	0.0269297	pos
GSE20715_WT_VS_TLR4_KO_LUNG_UP	32	1.81633	0.00801603	0.0269065	pos
GO_EMBRYONIC_MORPHOGENESIS	77	1.81628	0.00198413	0.0268957	pos
GSE39556_UNTREATED_VS_3H_POLYIC_INJ_MOUSE_CD8A_DC_DN	38	1.81605	0.00632911	0.0269313	pos
MORF_CCNI	29	1.81465	0.00383877	0.0271971	pos
GSE38681_WT_VS_LYL1_KO_LYMPHOID_PRIMED_MULTIPOTENT_PROGENITOR_UP	33	1.8145	0.00591716	0.0271997	pos
KRAS.DF.V1_UP	39	1.81449	0.00404858	0.0271818	pos
GSE3982_MAST_CELL_VS_CENT_MEMORY_CD4_TCELL_UP	48	1.81442	0.00195312	0.0271735	pos
REACTOME_UCH_PROTEINASES	24	1.81418	0.00613497	0.0272169	pos
GO_OXIDATION_REDUCTION_PROCESS	167	1.81375	0	0.0273011	pos
GSE24142_DN2_VS_DN3_THYMOCYTE_ADULT_UP	26	1.81322	0.00784314	0.0274188	pos
GO_POSITIVE_REGULATION_OF_MAPK_CASCADE	76	1.8123	0	0.0276015	pos
REACTOME_PEROXISOMAL_PROTEIN_IMPORT	16	1.81149	0.00203666	0.0277909	pos
GSE17721_LPS_VS_GARDIQUIMOD_0.5H_BMDC_UP	36	1.81148	0.00387597	0.0277645	pos
GSE22886_CTRL_VS_LPS_24H_DC_UP	39	1.81109	0.00616016	0.0278313	pos
GSE36476_CTRL_VS_TSST_ACT_16H_MEMORY_CD4_TCELL_OLD_DN	51	1.81085	0.00196078	0.0278723	pos
REACTOME_BETA_CATENIN_INDEPENDENT_WNT_SIGNALING	28	1.8108	0.002	0.027858	pos
GSE17721_LPS_VS_CPG_6H_BMDC_UP	40	1.81046	0.0019685	0.027911	pos
GSE19401_NAIVE_VS_IMMUNIZED_MOUSE_PLN_FOLLICULAR_DC_UP	38	1.81036	0.0019305	0.0279074	pos
GO_SULFUR_COMPOUND_BIOSYNTHETIC_PROCESS	33	1.81025	0.01002	0.0278999	pos
GO_NUCLEOSIDE_BISPHOSPHATE_METABOLIC_PROCESS	17	1.81014	0.0100402	0.027899	pos
GSE22886_CTRL_VS_LPS_24H_DC_DN	38	1.80996	0	0.027929	pos
GSE17721_LPS_VS_GARDIQUIMOD_16H_BMDC_UP	38	1.80922	0.0019084	0.0280809	pos
PROVENZANI_METASTASIS_UP	47	1.80915	0.00201613	0.0280692	pos
GSE34156_TLR1_TLR2_LIGAND_VS_NOD2_AND_TLR1_TLR2_LIGAND_6H_TREATED_MONOCYTE_DN	16	1.80884	0.00753296	0.0281175	pos
GSE19941_LPS_VS_LPS_AND_IL10_STIM_IL10_KO_NFKBP50_KO_MACROPHAGE_UP	33	1.80849	0.00613497	0.0281702	pos
HUANG_GATA2_TARGETS_UP	22	1.80786	0.0103306	0.0282866	pos
KAECH_NAIVE_VS_DAY15_EFF_CD8_TCELL_UP	41	1.80779	0.0019084	0.0282667	pos
MORF_GNB1	81	1.80761	0	0.0282842	pos
GATA1_04	32	1.8067	0.00763359	0.0284762	pos
MCBRYAN_PUBERTAL_BREAST_4_5WK_DN	30	1.80638	0.00374532	0.0285347	pos
CERVERA_SDHB_TARGETS_2	17	1.80565	0.00619835	0.0287088	pos
HSIAO_LIVER_SPECIFIC_GENES	30	1.80507	0.00417537	0.0288269	pos
GO_TISSUE_MORPHOGENESIS	107	1.80501	0.00194175	0.0288132	pos
TGANNYRGCA_TCF11MAFG_01	53	1.80471	0.00220751	0.0288541	pos
GO_SKIN_DEVELOPMENT	29	1.80468	0.00769231	0.0288338	pos
SASSON_RESPONSE_TO_FORSKOLIN_DN	20	1.80467	0.00619835	0.028811	pos
GSE26156_DOUBLE_POSITIVE_VS_CD4_SINGLE_POSITIVE_THYMOCYTE_UP	55	1.80451	0	0.0288346	pos
GSE7218_IGM_VS_IGG_SIGNAL_THGOUGH_ANTIGEN_BCELL_DN	26	1.80428	0.00596422	0.0288566	pos
GSE13411_PLASMA_CELL_VS_MEMORY_BCELL_DN	38	1.80416	0.0121704	0.0288549	pos
GSE360_L_MAJOR_VS_B_MALAYI_LOW_DOSE_MAC_DN	32	1.8041	0.006	0.0288453	pos
MCBRYAN_PUBERTAL_BREAST_3_4WK_UP	26	1.80406	0.0118812	0.0288304	pos
GSE360_T_GONDII_VS_B_MALAYI_LOW_DOSE_MAC_DN	34	1.8038	0.00205761	0.0288681	pos
GSE26030_UNSTIM_VS_RESTIM_TH17_DAY5_POST_POLARIZATION_DN	29	1.80304	0.00404858	0.0290333	pos
GO_INTRACELLULAR_TRANSPORT	350	1.80298	0	0.029021	pos
EGFR_UP.V1_UP	30	1.80284	0.0101215	0.0290323	pos
GO_CELLULAR_RESPONSE_TO_TOXIC_SUBSTANCE	28	1.80267	0.00595238	0.0290462	pos
ALTEMEIER_RESPONSE_TO_LPS_WITH_MECHANICAL_VENTILATION	16	1.80232	0.00378788	0.0290967	pos
GO_ORGANONITROGEN_COMPOUND_BIOSYNTHETIC_PROCESS	339	1.80173	0	0.0292268	pos
MODULE_46	26	1.80151	0.00394477	0.0292678	pos
GSE29164_UNTREATED_VS_CD8_TCELL_AND_IL12_TREATED_MELANOMA_DAY7_DN	24	1.80136	0.0139721	0.0292698	pos
GO_COATED_VESICLE	54	1.80075	0.00974659	0.029385	pos
GSE22935_WT_VS_MYD88_KO_MACROPHAGE_48H_MBOVIS_BCG_STIM_DN	33	1.80062	0.0038835	0.0293932	pos
VECCHI_GASTRIC_CANCER_ADVANCED_VS_EARLY_UP	28	1.8005	0.00761905	0.0294041	pos
MORF_PSMC2	32	1.80049	0	0.0293798	pos
GSE12845_IGD_POS_BLOOD_VS_NAIVE_TONSIL_BCELL_UP	29	1.79981	0.00982318	0.029522	pos
GSE21774_CD62L_POS_CD56_DIM_VS_CD62L_NEG_CD56_DIM_NK_CELL_DN	27	1.79948	0.00389105	0.0295784	pos
CHEN_LVAD_SUPPORT_OF_FAILING_HEART_UP	19	1.79894	0.0186567	0.0296866	pos
MCLACHLAN_DENTAL_CARIES_UP	19	1.79883	0.0060241	0.0296932	pos
EPPERT_HSC_R	22	1.79841	0.00614754	0.0297673	pos
GO_VESICLE_TARGETING	16	1.79823	0.008	0.0297906	pos
GSE17721_0.5H_VS_24H_POLYIC_BMDC_UP	37	1.798	0.00399202	0.0298191	pos
AMIT_EGF_RESPONSE_480_HELA	25	1.79791	0.00845666	0.0298102	pos
GSE6259_FLT3L_INDUCED_DEC205_POS_DC_VS_CD8_TCELL_UP	34	1.7978	0.00424628	0.0298141	pos
JI_RESPONSE_TO_FSH_UP	17	1.79767	0.00406504	0.0298142	pos
GO_NEGATIVE_REGULATION_OF_CATALYTIC_ACTIVITY	96	1.79756	0	0.029813	pos
GSE16385_MONOCYTE_VS_12H_IFNG_TNF_TREATED_MACROPHAGE_UP	33	1.79751	0.00584795	0.0297976	pos
MODULE_75	28	1.79728	0.00406504	0.0298246	pos
GO_REGULATION_OF_PROTEIN_BINDING	38	1.79716	0.00411523	0.0298247	pos
BRUINS_UVC_RESPONSE_LATE	223	1.79675	0	0.0299055	pos
GOZGIT_ESR1_TARGETS_DN	127	1.79638	0	0.0299686	pos
GSE40666_STAT1_KO_VS_STAT4_KO_CD8_TCELL_WITH_IFNA_STIM_90MIN_DN	16	1.7962	0.00393701	0.0299839	pos
DAZARD_UV_RESPONSE_CLUSTER_G1	17	1.79578	0.00419287	0.030067	pos
GSE17974_CTRL_VS_ACT_IL4_AND_ANTI_IL12_2H_CD4_TCELL_UP	35	1.79559	0.00587084	0.0300822	pos
GSE19401_UNSTIM_VS_RETINOIC_ACID_STIM_FOLLICULAR_DC_UP	29	1.79549	0.00770713	0.030082	pos
AKT_UP.V1_UP	25	1.79514	0.00792079	0.0301456	pos
GSE3982_EOSINOPHIL_VS_DC_DN	44	1.7945	0.00792079	0.0303061	pos
GSE25123_IL4_VS_IL4_AND_ROSIGLITAZONE_STIM_PPARG_KO_MACROPHAGE_DAY10_UP	25	1.79437	0.00756144	0.030312	pos
GSE10239_NAIVE_VS_DAY4.5_EFF_CD8_TCELL_UP	41	1.79381	0.00193424	0.0304364	pos
YAGI_AML_WITH_INV_16_TRANSLOCATION	89	1.79371	0	0.0304346	pos
GO_REGULATION_OF_CELL_CELL_ADHESION	39	1.79349	0.00202429	0.0304584	pos
GSE22886_TH1_VS_TH2_48H_ACT_DN	38	1.79298	0.00384615	0.0305595	pos
CHR10Q22	18	1.79241	0.0103093	0.0306745	pos
GSE26030_UNSTIM_VS_RESTIM_TH17_DAY15_POST_POLARIZATION_DN	40	1.79226	0.00201207	0.0306687	pos
GO_CELL_MOTILITY	208	1.79115	0	0.0309178	pos
GSE22935_UNSTIM_VS_12H_MBOVIS_BCG_STIM_MACROPHAGE_UP	37	1.79084	0	0.0309889	pos
GO_SKELETAL_SYSTEM_MORPHOGENESIS	36	1.79073	0.0039604	0.0309904	pos
GSE22611_UNSTIM_VS_6H_MDP_STIM_NOD2_TRANSDUCED_HEK293T_CELL_DN	40	1.79015	0.00191205	0.0311081	pos
GSE16755_CTRL_VS_IFNA_TREATED_MAC_DN	46	1.78989	0.00574713	0.0311323	pos
BAELDE_DIABETIC_NEPHROPATHY_DN	96	1.7897	0.00198807	0.0311488	pos
GSE37533_UNTREATED_VS_PIOGLIZATONE_TREATED_CD4_TCELL_PPARG1_AND_FOXP3_TRASDUCED_DN	35	1.78934	0.00811359	0.0312055	pos
GCGNNANTTCC_UNKNOWN	20	1.78925	0.00831601	0.0311994	pos
GSE6092_UNSTIM_VS_IFNG_STIM_AND_B_BURGDORFERI_INF_ENDOTHELIAL_CELL_UP	42	1.78848	0.00790514	0.0313943	pos
REACTOME_TOLL_LIKE_RECEPTOR_CASCADES	27	1.78836	0.0060241	0.0314055	pos
GO_POSITIVE_REGULATION_OF_PHOSPHORUS_METABOLIC_PROCESS	152	1.78818	0	0.0314255	pos
MORF_BECN1	23	1.78804	0.00380952	0.0314441	pos
GSE19198_CTRL_VS_IL21_TREATED_TCELL_1H_DN	35	1.78688	0.00595238	0.0316999	pos
TCF4_Q5	38	1.78633	0.00389864	0.0318186	pos
GO_ENDOTHELIUM_DEVELOPMENT	20	1.78618	0.0121951	0.0318143	pos
HALLMARK_GLYCOLYSIS	41	1.78579	0	0.0318901	pos
GSE3982_NEUTROPHIL_VS_BCELL_DN	49	1.78576	0	0.0318646	pos
GSE360_CTRL_VS_L_DONOVANI_MAC_UP	46	1.78558	0.0019685	0.0318917	pos
GO_ACTIN_CYTOSKELETON	66	1.78545	0.00203252	0.0318949	pos
GSE29949_MICROGLIA_BRAIN_VS_CD8_POS_DC_SPLEEN_DN	28	1.7852	0.00798403	0.0319229	pos
GO_REGULATION_OF_LEUKOCYTE_CHEMOTAXIS	15	1.78518	0.00806452	0.0318975	pos
GSE32423_MEMORY_VS_NAIVE_CD8_TCELL_UP	25	1.78486	0.00623701	0.0319568	pos
GO_MICROBODY_PART	17	1.78473	0.00775194	0.0319575	pos
KOYAMA_SEMA3B_TARGETS_UP	42	1.78465	0.0019802	0.0319545	pos
GSE3982_NEUTROPHIL_VS_CENT_MEMORY_CD4_TCELL_UP	32	1.78434	0.00994036	0.0320259	pos
GSE38304_MYC_NEG_VS_POS_GC_BCELL_DN	27	1.78431	0.0121704	0.031998	pos
GSE21360_NAIVE_VS_SECONDARY_MEMORY_CD8_TCELL_DN	34	1.78423	0.00400802	0.0319948	pos
GSE1740_MCSF_VS_MCSF_AND_IFNG_DAY2_DERIVED_MACROPHAGE_UP	34	1.78339	0.00793651	0.0321749	pos
GO_SULFUR_COMPOUND_BINDING	30	1.78318	0.00383142	0.0321975	pos
GO_POSITIVE_REGULATION_OF_PROTEOLYSIS	54	1.78282	0.00199203	0.0322698	pos
MORF_RAB6A	15	1.78239	0.00392157	0.0323727	pos
GSE32164_RESTING_DIFFERENTIATED_VS_ALTERNATIVELY_ACT_M2_MACROPHAGE_DN	34	1.78212	0.00421941	0.0324283	pos
GSE2706_R848_VS_R848_AND_LPS_2H_STIM_DC_DN	22	1.78207	0.0063425	0.0324088	pos
GO_SECRETORY_GRANULE_MEMBRANE	32	1.78118	0.00406504	0.0326195	pos
GO_T_CELL_RECEPTOR_SIGNALING_PATHWAY	36	1.7803	0.004	0.0328301	pos
GSE41867_DAY6_VS_DAY8_LCMV_CLONE13_EFFECTOR_CD8_TCELL_UP	29	1.78023	0.011257	0.0328189	pos
GO_SIDE_OF_MEMBRANE	54	1.7802	0.002079	0.0327991	pos
GSE43955_10H_VS_60H_ACT_CD4_TCELL_UP	40	1.78	0.0059761	0.0328225	pos
GO_COATED_VESICLE_MEMBRANE	37	1.77991	0.00607287	0.0328175	pos
GSE36392_TYPE_2_MYELOID_VS_NEUTROPHIL_IL25_TREATED_LUNG_DN	44	1.77899	0.00407332	0.0330877	pos
GCM_ACTG1	34	1.77875	0.00404858	0.033118	pos
GSE24142_EARLY_THYMIC_PROGENITOR_VS_DN2_THYMOCYTE_ADULT_DN	37	1.77838	0	0.0331665	pos
GO_PROTEASE_BINDING	22	1.77767	0.0103093	0.0333188	pos
GSE3982_BASOPHIL_VS_EFF_MEMORY_CD4_TCELL_UP	45	1.77753	0.00584795	0.0333244	pos
GSE9650_EFFECTOR_VS_EXHAUSTED_CD8_TCELL_UP	44	1.77747	0.00806452	0.0333215	pos
GSE3982_EOSINOPHIL_VS_CENT_MEMORY_CD4_TCELL_DN	38	1.77682	0.00591716	0.0334791	pos
GSE16385_MONOCYTE_VS_12H_ROSIGLITAZONE_IL4_TREATED_MACROPHAGE_DN	39	1.77648	0.00632911	0.0335429	pos
GSE43955_TH0_VS_TGFB_IL6_TH17_ACT_CD4_TCELL_42H_UP	42	1.77613	0.0122951	0.0336055	pos
GO_CARBOHYDRATE_CATABOLIC_PROCESS	35	1.7756	0.00202429	0.033701	pos
GSE40443_INDUCED_VS_TOTAL_TREG_DN	26	1.77515	0.00188679	0.03379	pos
GO_PROTON_TRANSMEMBRANE_TRANSPORTER_ACTIVITY	16	1.77461	0.00990099	0.0338995	pos
RIGGI_EWING_SARCOMA_PROGENITOR_DN	41	1.77452	0.00218341	0.0338936	pos
GO_LIPID_LOCALIZATION	50	1.77419	0	0.0339625	pos
GO_GASTRULATION	26	1.77402	0.0102881	0.0339966	pos
GO_CYTOKINE_RECEPTOR_BINDING	29	1.77307	0.00587084	0.0342421	pos
GO_CELLULAR_MACROMOLECULE_LOCALIZATION	381	1.77292	0	0.034265	pos
GSE30083_SP2_VS_SP4_THYMOCYTE_DN	25	1.77237	0.00198807	0.0343748	pos
GSE34205_RSV_VS_FLU_INF_INFANT_PBMC_DN	29	1.77222	0.0115385	0.0343819	pos
HELLER_HDAC_TARGETS_UP	56	1.77215	0	0.034372	pos
GSE360_L_MAJOR_VS_B_MALAYI_LOW_DOSE_DC_DN	41	1.77204	0.00195312	0.0343682	pos
GSE37301_GRANULOCYTE_MONOCYTE_PROGENITOR_VS_RAG2_KO_NK_CELL_UP	42	1.7713	0.011976	0.0345595	pos
GSE17721_CTRL_VS_LPS_12H_BMDC_UP	41	1.77091	0.0039604	0.0346239	pos
GSE8835_HEALTHY_VS_CLL_CD8_TCELL_DN	34	1.77083	0.00608519	0.0346199	pos
GSE43955_10H_VS_30H_ACT_CD4_TCELL_UP	26	1.77073	0.00610998	0.0346159	pos
GCNP_SHH_UP_EARLY.V1_DN	29	1.7703	0.00806452	0.0347114	pos
GSE22886_DC_VS_MONOCYTE_UP	45	1.77011	0.00402414	0.0347384	pos
REACTOME_SIGNALING_BY_VEGF	19	1.76959	0.010395	0.0348632	pos
WATANABE_RECTAL_CANCER_RADIOTHERAPY_RESPONSIVE_UP	26	1.76958	0.00407332	0.0348399	pos
GO_PEPTIDYL_TYROSINE_MODIFICATION	44	1.76956	0.00395257	0.0348119	pos
MORF_PPP1CA	52	1.76934	0.00579151	0.03484	pos
REACTOME_SIGNALING_BY_THE_B_CELL_RECEPTOR_BCR	23	1.76916	0.0116505	0.0348634	pos
GO_POSITIVE_REGULATION_OF_INTRACELLULAR_SIGNAL_TRANSDUCTION	138	1.76902	0	0.0348664	pos
MORF_G22P1	46	1.76855	0.00194175	0.0349719	pos
GO_ELECTRON_TRANSFER_ACTIVITY	21	1.76836	0.0139442	0.0349925	pos
MORF_PRDX3	22	1.76831	0.0163934	0.034974	pos
GO_MACROMOLECULE_CATABOLIC_PROCESS	278	1.76793	0	0.0350576	pos
GSE20366_TREG_VS_NAIVE_CD4_TCELL_DN	26	1.76791	0.00617284	0.0350332	pos
GSE5679_RARA_AGONIST_AM580_VS_AM580_AND_ROSIGLITAZONE_TREATED_DC_UP	40	1.7678	0.00417537	0.035029	pos
REACTOME_SCF_SKP2_MEDIATED_DEGRADATION_OF_P27_P21	16	1.76764	0.0141129	0.0350494	pos
GSE7460_TREG_VS_TCONV_ACT_DN	28	1.76762	0.0164271	0.0350251	pos
GSE29164_DAY3_VS_DAY7_UNTREATED_MELANOMA_DN	52	1.76625	0.00389864	0.035397	pos
GSE29618_MONOCYTE_VS_MDC_DN	41	1.76599	0.00208768	0.0354501	pos
GSE32423_IL7_VS_IL7_IL4_NAIVE_CD8_TCELL_UP	28	1.76588	0.00579151	0.0354491	pos
GSE360_L_DONOVANI_VS_B_MALAYI_LOW_DOSE_DC_DN	31	1.76519	0.00190114	0.0356238	pos
PRC2_EZH2_UP.V1_UP	33	1.76514	0.00604839	0.0356085	pos
GSE36392_TYPE_2_MYELOID_VS_EOSINOPHIL_IL25_TREATED_LUNG_UP	46	1.76487	0.00194175	0.0356581	pos
GSE3982_MAST_CELL_VS_NKCELL_UP	53	1.76484	0.00618557	0.0356392	pos
GSE25123_WT_VS_PPARG_KO_MACROPHAGE_ROSIGLITAZONE_STIM_UP	32	1.76473	0.0083682	0.0356462	pos
GSE22229_UNTREATED_VS_IMMUNOSUPP_THERAPY_RENAL_TRANSPLANT_PATIENT_PBMC_DN	31	1.76448	0.00195312	0.0356955	pos
MARTORIATI_MDM4_TARGETS_FETAL_LIVER_UP	46	1.76406	0.00589391	0.0357988	pos
GO_POSITIVE_REGULATION_OF_LEUKOCYTE_CELL_CELL_ADHESION	22	1.76398	0.00767754	0.0357928	pos
GSE5542_UNTREATED_VS_IFNA_TREATED_EPITHELIAL_CELLS_6H_UP	34	1.76372	0.00195695	0.0358393	pos
GO_POSITIVE_REGULATION_OF_LEUKOCYTE_DIFFERENTIATION	19	1.76279	0.00824742	0.0360764	pos
GSE17721_PAM3CSK4_VS_CPG_8H_BMDC_UP	38	1.76256	0.006	0.0360958	pos
GSE18281_SUBCAPSULAR_VS_PERIMEDULLARY_CORTICAL_REGION_OF_THYMUS_UP	41	1.76248	0.00988142	0.0360953	pos
GSE339_CD4POS_VS_CD8POS_DC_UP	34	1.76232	0.00203666	0.036124	pos
GSE22443_IL2_VS_IL12_TREATED_ACT_CD8_TCELL_DN	49	1.76215	0.0039604	0.0361445	pos
MEK_UP.V1_UP	32	1.76189	0.00601202	0.036185	pos
GSE18893_TCONV_VS_TREG_2H_CULTURE_UP	41	1.76089	0.00595238	0.0364594	pos
GSE17721_CTRL_VS_LPS_24H_BMDC_DN	38	1.76089	0.00208768	0.0364295	pos
GSE37533_PPARG1_FOXP3_VS_FOXP3_TRANSDUCED_CD4_TCELL_UP	33	1.76052	0.00808081	0.036523	pos
GO_REGULATION_OF_ESTABLISHMENT_OF_PLANAR_POLARITY	24	1.75983	0.00603622	0.0367074	pos
MORF_SART1	17	1.75969	0.0171429	0.0367158	pos
HIRSCH_CELLULAR_TRANSFORMATION_SIGNATURE_UP	44	1.75969	0	0.0366893	pos
GSE17721_PAM3CSK4_VS_GADIQUIMOD_16H_BMDC_DN	32	1.75955	0.0121457	0.0367047	pos
GSE27786_LIN_NEG_VS_BCELL_DN	37	1.75927	0.0059761	0.0367662	pos
MORF_EIF4A2	48	1.75918	0.00369686	0.0367629	pos
AP1_Q2	44	1.75884	0.00381679	0.03682	pos
MORF_EIF3S2	59	1.75877	0.00619835	0.0368155	pos
GSE17721_LPS_VS_POLYIC_24H_BMDC_UP	40	1.75871	0.00845666	0.0367994	pos
GSE40666_NAIVE_VS_EFFECTOR_CD8_TCELL_DN	37	1.75843	0.00828157	0.0368469	pos
GSE9988_ANTI_TREM1_AND_LPS_VS_CTRL_TREATED_MONOCYTES_DN	38	1.75782	0.00384615	0.0370167	pos
GSE12845_IGD_POS_BLOOD_VS_PRE_GC_TONSIL_BCELL_UP	37	1.75777	0.00782779	0.037011	pos
GSE33374_CD8_ALPHAALPHA_VS_ALPHABETA_CD161_HIGH_TCELL_DN	33	1.75735	0.00391389	0.0371145	pos
GSE12366_NAIVE_VS_MEMORY_BCELL_DN	34	1.75731	0.00639659	0.0370972	pos
FULCHER_INFLAMMATORY_RESPONSE_LECTIN_VS_LPS_UP	98	1.75722	0.00380952	0.0370914	pos
GSE2585_THYMIC_DC_VS_THYMIC_MACROPHAGE_DN	29	1.75716	0.00793651	0.0370764	pos
GSE1432_1H_VS_6H_IFNG_MICROGLIA_DN	46	1.75633	0.00197628	0.0372785	pos
GSE11961_MARGINAL_ZONE_BCELL_VS_GERMINAL_CENTER_BCELL_DAY40_DN	30	1.75615	0.00788955	0.0373139	pos
GO_PEPTIDASE_ACTIVITY	83	1.75592	0	0.0373376	pos
MODULE_44	39	1.75553	0.0144628	0.0374277	pos
GSE41867_DAY6_VS_DAY8_LCMV_ARMSTRONG_EFFECTOR_CD8_TCELL_UP	42	1.75523	0.00617284	0.0375029	pos
RB_P107_DN.V1_DN	28	1.75495	0.00784314	0.0375653	pos
GSE360_T_GONDII_VS_B_MALAYI_HIGH_DOSE_MAC_DN	29	1.75452	0.010101	0.0376722	pos
MANALO_HYPOXIA_UP	38	1.75449	0.00814664	0.0376488	pos
REACTOME_POST_TRANSLATIONAL_PROTEIN_MODIFICATION	260	1.75447	0	0.0376255	pos
GSE360_LOW_DOSE_B_MALAYI_VS_M_TUBERCULOSIS_DC_UP	39	1.7544	0.00389105	0.0376261	pos
CUI_TCF21_TARGETS_2_DN	157	1.75425	0.0019685	0.0376313	pos
GSE42088_UNINF_VS_LEISHMANIA_INF_DC_2H_DN	40	1.75386	0	0.037723	pos
GSE45365_BCELL_VS_CD8_TCELL_UP	20	1.75385	0.004158	0.0376974	pos
GO_ODONTOGENESIS	22	1.75349	0.0100806	0.0377616	pos
MARTORIATI_MDM4_TARGETS_NEUROEPITHELIUM_UP	35	1.75348	0.00578035	0.0377372	pos
GSE360_DC_VS_MAC_DN	39	1.75342	0.00609756	0.0377287	pos
GSE21927_SPLEEN_VS_BONE_MARROW_MONOCYTE_BALBC_DN	23	1.75335	0.0105485	0.037727	pos
GSE14769_20MIN_VS_360MIN_LPS_BMDM_UP	39	1.75307	0.00398406	0.0377683	pos
LTE2_UP.V1_DN	43	1.75243	0.00604839	0.0379328	pos
GO_CELLULAR_RESPONSE_TO_TOPOLOGICALLY_INCORRECT_PROTEIN	34	1.75239	0.00389864	0.0379185	pos
BURTON_ADIPOGENESIS_6	40	1.75195	0.00990099	0.0380194	pos
GSE35685_CD34POS_CD38NEG_VS_CD34POS_CD10POS_BONE_MARROW_UP	30	1.7518	0.0039604	0.0380387	pos
GSE2585_AIRE_KO_VS_WT_CD80_HIGH_MTEC_UP	35	1.75158	0.00619835	0.038074	pos
GSE24142_EARLY_THYMIC_PROGENITOR_VS_DN2_THYMOCYTE_FETAL_UP	26	1.75129	0.00764818	0.038116	pos
GO_MITOCHONDRION	276	1.75114	0	0.0381318	pos
GSE26488_CTRL_VS_PEPTIDE_INJECTION_HDAC7_DELTAP_TG_OT2_THYMOCYTE_DN	40	1.75075	0	0.0382154	pos
REACTOME_PHASE_II_CONJUGATION_OF_COMPOUNDS	15	1.75024	0.0115607	0.0383562	pos
CREIGHTON_ENDOCRINE_THERAPY_RESISTANCE_1	92	1.74953	0.00206612	0.038538	pos
GSE9509_LPS_VS_LPS_AND_IL10_STIM_IL10_KO_MACROPHAGE_10MIN_UP	36	1.74953	0.00835073	0.0385087	pos
GSE2770_IL12_AND_TGFB_ACT_VS_ACT_CD4_TCELL_6H_UP	32	1.7495	0.016632	0.0384851	pos
KAYO_AGING_MUSCLE_DN	29	1.7495	0.00813008	0.0384559	pos
GO_VASCULAR_ENDOTHELIAL_GROWTH_FACTOR_RECEPTOR_SIGNALING_PATHWAY	17	1.74932	0.0138614	0.0384748	pos
HAN_SATB1_TARGETS_UP	74	1.74922	0	0.0384858	pos
GSE26488_WT_VS_HDAC7_DELTAP_TG_OT2_THYMOCYTE_WITH_PEPTIDE_INJECTION_UP	27	1.74847	0.00550459	0.038737	pos
YAO_TEMPORAL_RESPONSE_TO_PROGESTERONE_CLUSTER_16	16	1.74771	0.0139165	0.0389659	pos
ONKEN_UVEAL_MELANOMA_DN	130	1.74756	0	0.0389666	pos
REACTOME_DOWNSTREAM_SIGNALING_EVENTS_OF_B_CELL_RECEPTOR_BCR	21	1.74685	0.016129	0.0391491	pos
GSE17721_0.5H_VS_12H_PAM3CSK4_BMDC_DN	34	1.74676	0.0107066	0.0391529	pos
GSE2585_CTEC_VS_MTEC_THYMUS_UP	29	1.74671	0.00421053	0.0391368	pos
GO_PEPTIDE_METABOLIC_PROCESS	15	1.74599	0.0148305	0.0393452	pos
GO_REGULATION_OF_LIPID_LOCALIZATION	22	1.74578	0.0020284	0.039381	pos
GO_REGULATION_OF_PROTEIN_CATABOLIC_PROCESS	65	1.74557	0.00197628	0.0394148	pos
GRAESSMANN_APOPTOSIS_BY_SERUM_DEPRIVATION_UP	90	1.74538	0.0020284	0.0394483	pos
GSE36476_CTRL_VS_TSST_ACT_16H_MEMORY_CD4_TCELL_YOUNG_DN	34	1.74518	0.00831601	0.0394853	pos
GSE12845_IGD_POS_VS_NEG_BLOOD_BCELL_DN	53	1.74508	0.00382409	0.03949	pos
CETS1P54_01	59	1.745	0.00372439	0.039477	pos
GO_AMIDE_BIOSYNTHETIC_PROCESS	176	1.74495	0.002079	0.0394618	pos
GSE22196_HEALTHY_VS_OBESE_MOUSE_SKIN_GAMMADELTA_TCELL_UP	37	1.74458	0.00408163	0.0395649	pos
GSE29618_MONOCYTE_VS_PDC_DAY7_FLU_VACCINE_UP	32	1.74432	0.00203666	0.0396324	pos
GSE22103_UNSTIM_VS_LPS_STIM_NEUTROPHIL_DN	24	1.74389	0.0063425	0.0397329	pos
GO_VESICLE_BUDDING_FROM_MEMBRANE	22	1.74378	0.0139721	0.0397385	pos
GSE7460_CTRL_VS_TGFB_TREATED_ACT_FOXP3_MUT_TCONV_UP	45	1.74375	0.00635593	0.0397166	pos
GCM_CSNK2B	27	1.74374	0.0118343	0.039688	pos
GO_SIGNAL_TRANSDUCTION_BY_PROTEIN_PHOSPHORYLATION	131	1.74343	0	0.0397487	pos
GSE15330_HSC_VS_MEGAKARYOCYTE_ERYTHROID_PROGENITOR_IKAROS_KO_UP	46	1.74272	0.00401606	0.0399556	pos
GO_REGULATION_OF_CARDIAC_MUSCLE_TISSUE_DEVELOPMENT	18	1.74227	0.0156556	0.0400707	pos
GSE15330_WT_VS_IKAROS_KO_HSC_UP	43	1.74176	0.003861	0.0401989	pos
GO_MODIFIED_AMINO_ACID_BINDING	17	1.74173	0.0114943	0.0401735	pos
RIZKI_TUMOR_INVASIVENESS_3D_DN	38	1.74165	0.00795229	0.0401666	pos
KIM_WT1_TARGETS_12HR_UP	34	1.74154	0.00779727	0.0401709	pos
REACTOME_PLATELET_ACTIVATION_SIGNALING_AND_AGGREGATION	35	1.74145	0.0183299	0.0401662	pos
GSE37301_MULTIPOTENT_PROGENITOR_VS_PRO_BCELL_UP	33	1.74127	0.0142857	0.04019	pos
GSE9988_ANTI_TREM1_VS_ANTI_TREM1_AND_LPS_MONOCYTE_UP	46	1.74092	0.00206186	0.0402794	pos
GSE41176_UNSTIM_VS_ANTI_IGM_STIM_TAK1_KO_BCELL_24H_UP	36	1.74052	0.010101	0.0403742	pos
GSE17186_CD21LOW_VS_CD21HIGH_TRANSITIONAL_BCELL_CORD_BLOOD_UP	41	1.73942	0.00793651	0.0406912	pos
GO_POSITIVE_REGULATION_OF_SIGNALING	259	1.73889	0	0.0408248	pos
GO_BIOLOGICAL_ADHESION	178	1.73832	0.00200803	0.0409789	pos
GSE17721_LPS_VS_PAM3CSK4_24H_BMDC_DN	33	1.73827	0.0134875	0.040965	pos
GSE16522_ANTI_CD3CD28_STIM_VS_UNSTIM_MEMORY_CD8_TCELL_DN	39	1.73805	0.008	0.0410251	pos
GSE22501_PERIPHERAL_BLOOD_VS_CORD_BLOOD_TREG_UP	19	1.73792	0.0122699	0.041034	pos
GSE13411_NAIVE_VS_MEMORY_BCELL_DN	57	1.73787	0.00189753	0.0410211	pos
MODULE_64	46	1.73774	0.002	0.0410387	pos
GSE17721_LPS_VS_PAM3CSK4_1H_BMDC_UP	46	1.73739	0.0020284	0.0411353	pos
GO_REGULATION_OF_PROTEIN_LOCALIZATION_TO_PLASMA_MEMBRANE	21	1.73718	0.0272904	0.0411776	pos
GSE2770_UNTREATED_VS_IL4_TREATED_ACT_CD4_TCELL_6H_UP	39	1.73678	0.00198807	0.0412872	pos
GSE3982_MAST_CELL_VS_DC_UP	31	1.73669	0.0118343	0.0412764	pos
GO_POSITIVE_REGULATION_OF_PROTEIN_MODIFICATION_PROCESS	184	1.73656	0	0.0412871	pos
GSE41176_WT_VS_TAK1_KO_UNSTIM_BCELL_UP	32	1.73606	0.00862069	0.0414048	pos
GO_RESPONSE_TO_ESTRADIOL	18	1.73537	0.0176125	0.0415862	pos
BROWNE_HCMV_INFECTION_20HR_DN	22	1.73473	0.0141129	0.0417596	pos
GO_NEGATIVE_REGULATION_OF_CELLULAR_PROTEIN_CATABOLIC_PROCESS	23	1.7339	0.0221774	0.0420133	pos
GO_RESPONSE_TO_INTERLEUKIN_1	41	1.73384	0.00607287	0.0419988	pos
GSE18791_CTRL_VS_NEWCASTLE_VIRUS_DC_8H_DN	33	1.73351	0.0138889	0.0420779	pos
GSE36888_STAT5_AB_KNOCKIN_VS_WT_TCELL_IL2_TREATED_2H_UP	38	1.73349	0.00787402	0.0420504	pos
GSE27786_CD4_TCELL_VS_NKCELL_DN	54	1.73309	0.00407332	0.0421531	pos
GSE32986_GMCSF_VS_GMCSF_AND_CURDLAN_HIGHDOSE_STIM_DC_UP	37	1.73266	0.00833333	0.0422685	pos
GO_RESPONSE_TO_ANTIBIOTIC	38	1.73263	0.0120482	0.042243	pos
GO_ORGANELLE_SUBCOMPARTMENT	60	1.73246	0.00608519	0.0422629	pos
BROCKE_APOPTOSIS_REVERSED_BY_IL6	21	1.73243	0.020202	0.0422385	pos
GO_EXTRACELLULAR_MATRIX_STRUCTURAL_CONSTITUENT	18	1.73143	0.0188285	0.0425814	pos
PURBEY_TARGETS_OF_CTBP1_AND_SATB1_UP	18	1.73134	0.0118812	0.0425761	pos
GO_ACTIN_POLYMERIZATION_OR_DEPOLYMERIZATION	29	1.73134	0.0104822	0.0425441	pos
GSE26488_WT_VS_VP16_TRANSGENIC_HDAC7_KO_DOUBLE_POSITIVE_THYMOCYTE_UP	34	1.73107	0.0193798	0.0425975	pos
GSE43955_TH0_VS_TGFB_IL6_TH17_ACT_CD4_TCELL_42H_DN	26	1.73098	0.0141129	0.0425976	pos
REACTOME_TRANSCRIPTIONAL_REGULATION_BY_RUNX2	32	1.73052	0.00591716	0.0427024	pos
AML_Q6	38	1.73043	0.0131086	0.0426992	pos
GSE37301_MULTIPOTENT_PROGENITOR_VS_PRO_BCELL_DN	43	1.7303	0.00603622	0.042714	pos
HORIUCHI_WTAP_TARGETS_UP	63	1.73016	0.00398406	0.04273	pos
GSE20727_CTRL_VS_ROS_INHIBITOR_TREATED_DC_UP	32	1.73014	0.00408163	0.0427066	pos
COREBINDINGFACTOR_Q6	41	1.72993	0.0155642	0.0427449	pos
GSE17974_0H_VS_4H_IN_VITRO_ACT_CD4_TCELL_DN	39	1.7299	0.00191571	0.0427268	pos
GSE24142_EARLY_THYMIC_PROGENITOR_VS_DN2_THYMOCYTE_UP	28	1.72954	0.00804829	0.042816	pos
GO_NEGATIVE_REGULATION_OF_PROTEIN_CATABOLIC_PROCESS	27	1.72943	0.0103306	0.0428286	pos
GO_REGULATION_OF_PEPTIDYL_TYROSINE_PHOSPHORYLATION	27	1.72898	0.0125	0.0429503	pos
GSE9509_LPS_VS_LPS_AND_IL10_STIM_IL10_KO_MACROPHAGE_20MIN_UP	36	1.7287	0.00819672	0.0430212	pos
GSE411_UNSTIM_VS_100MIN_IL6_STIM_MACROPHAGE_DN	33	1.72843	0.00199601	0.0430771	pos
GO_MESENCHYMAL_CELL_DIFFERENTIATION	33	1.72818	0.00793651	0.0431245	pos
PARENT_MTOR_SIGNALING_UP	98	1.72814	0.00189394	0.0430956	pos
GO_CARBOHYDRATE_DERIVATIVE_METABOLIC_PROCESS	164	1.72742	0	0.0433044	pos
GSE14000_4H_VS_16H_LPS_DC_TRANSLATED_RNA_UP	37	1.72734	0.00628931	0.0433092	pos
GSE36826_NORMAL_VS_STAPH_AUREUS_INF_IL1R_KO_SKIN_UP	46	1.72733	0.00404858	0.0432803	pos
GSE17721_PAM3CSK4_VS_GADIQUIMOD_6H_BMDC_UP	42	1.7269	0.00566038	0.0433948	pos
GO_GROWTH_FACTOR_ACTIVITY	15	1.72684	0.0162602	0.0433806	pos
GSE43863_NAIVE_VS_TH1_EFF_CD4_TCELL_D6_LCMV_UP	32	1.72675	0.0136452	0.0433833	pos
GSE40274_CTRL_VS_HELIOS_TRANSDUCED_ACTIVATED_CD4_TCELL_UP	29	1.72593	0.0150094	0.0436275	pos
GO_REGULATION_OF_CELLULAR_COMPONENT_MOVEMENT	144	1.72587	0	0.0436142	pos
MULLIGHAN_NPM1_SIGNATURE_3_DN	30	1.72543	0.0100402	0.0437437	pos
GSE36826_NORMAL_VS_STAPH_AUREUS_INF_SKIN_DN	47	1.72489	0.00587084	0.0439044	pos
GSE11961_FOLLICULAR_BCELL_VS_MEMORY_BCELL_DAY7_UP	35	1.72475	0.0139165	0.0439152	pos
GSE31082_CD4_VS_CD8_SP_THYMOCYTE_UP	36	1.72458	0.00763359	0.0439393	pos
GSE29617_DAY3_VS_DAY7_TIV_FLU_VACCINE_PBMC_2008_UP	32	1.72455	0.00858369	0.0439185	pos
GSE11057_CD4_EFF_MEM_VS_PBMC_DN	31	1.72422	0.018	0.0439886	pos
GO_PROTEIN_CONTAINING_COMPLEX_BINDING	185	1.72398	0	0.0440318	pos
GO_REGULATION_OF_CELLULAR_AMINE_METABOLIC_PROCESS	16	1.72383	0.0140845	0.0440423	pos
GSE21063_CTRL_VS_ANTI_IGM_STIM_BCELL_NFATC1_KO_3H_UP	37	1.72349	0.0227743	0.044131	pos
GSE3982_BCELL_VS_EFF_MEMORY_CD4_TCELL_UP	40	1.72325	0.00980392	0.0441915	pos
GSE29949_CD8_NEG_DC_SPLEEN_VS_CD8_POS_DC_SPLEEN_UP	27	1.72291	0.0196078	0.0442728	pos
GO_STEROL_METABOLIC_PROCESS	15	1.72217	0.00998004	0.0445059	pos
GSE19772_CTRL_VS_HCMV_INF_MONOCYTES_UP	39	1.72129	0.011811	0.0447561	pos
GSE10325_LUPUS_CD4_TCELL_VS_LUPUS_BCELL_UP	25	1.72086	0.0120724	0.0448867	pos
GSE40274_CTRL_VS_FOXP3_AND_SATB1_TRANSDUCED_ACTIVATED_CD4_TCELL_DN	23	1.72081	0.0148936	0.0448674	pos
GSE360_L_DONOVANI_VS_M_TUBERCULOSIS_MAC_DN	30	1.72075	0.00817996	0.0448554	pos
GSE40274_FOXP3_VS_FOXP3_AND_LEF1_TRANSDUCED_ACTIVATED_CD4_TCELL_UP	38	1.72074	0.00835073	0.0448237	pos
GSE32986_UNSTIM_VS_CURDLAN_LOWDOSE_STIM_DC_DN	48	1.71944	0.0122951	0.0452646	pos
GARY_CD5_TARGETS_UP	82	1.71932	0.0040568	0.045277	pos
GSE3337_CTRL_VS_16H_IFNG_IN_CD8POS_DC_DN	32	1.71925	0.00406504	0.0452689	pos
GO_PEPTIDE_BIOSYNTHETIC_PROCESS	158	1.7189	0	0.0453695	pos
GSE339_CD8POS_VS_CD4CD8DN_DC_UP	34	1.71884	0.0102041	0.0453677	pos
GO_REGULATION_OF_BINDING	67	1.71797	0.00203252	0.0456486	pos
WANG_ESOPHAGUS_CANCER_VS_NORMAL_DN	25	1.7177	0.0149533	0.0457031	pos
GSE22935_UNSTIM_VS_12H_MBOVIS_BCG_STIM_MACROPHAGE_DN	37	1.71757	0.0120968	0.045735	pos
GSE24634_IL4_VS_CTRL_TREATED_NAIVE_CD4_TCELL_DAY7_DN	36	1.71732	0.0102669	0.0457824	pos
GO_PHOSPHATIDYLINOSITOL_PHOSPHATE_BINDING	33	1.7173	0.00392157	0.0457636	pos
MODULE_33	45	1.71696	0.004158	0.0458507	pos
GO_REGULATION_OF_ANIMAL_ORGAN_MORPHOGENESIS	47	1.71664	0.0119048	0.0459533	pos
SMID_BREAST_CANCER_NORMAL_LIKE_UP	45	1.71662	0.0102249	0.0459252	pos
GO_OUTER_MEMBRANE	40	1.71525	0.00399202	0.0463889	pos
GSE41867_DAY6_EFFECTOR_VS_DAY30_EXHAUSTED_CD8_TCELL_LCMV_CLONE13_UP	34	1.71524	0.00380228	0.0463595	pos
GSE3691_IFN_PRODUCING_KILLER_DC_VS_CONVENTIONAL_DC_SPLEEN_UP	35	1.71421	0.00948767	0.0467068	pos
GSE18791_UNSTIM_VS_NEWCATSLE_VIRUS_DC_6H_DN	35	1.71383	0.0102459	0.0468379	pos
GSE17721_CTRL_VS_LPS_0.5H_BMDC_DN	25	1.71368	0.0101215	0.0468647	pos
GO_AMIDE_BINDING	55	1.71354	0.00386847	0.0468801	pos
GSE2128_C57BL6_VS_NOD_CD4CD8_DP_THYMOCYTE_UP	46	1.71353	0.0120482	0.0468485	pos
GSE2770_IL12_ACT_VS_ACT_CD4_TCELL_2H_DN	52	1.71324	0.00790514	0.0469242	pos
QI_PLASMACYTOMA_UP	25	1.71322	0.0102249	0.0468936	pos
GSE22045_TREG_VS_TCONV_UP	32	1.71318	0.00408998	0.0468763	pos
GSE37301_RAG2_KO_VS_RAG2_AND_ETS1_KO_NK_CELL_UP	31	1.71291	0.0119522	0.0469346	pos
GSE36078_WT_VS_IL1R_KO_LUNG_DC_AFTER_AD5_T425A_HEXON_INF_UP	42	1.71285	0.00826446	0.0469183	pos
GSE40273_EOS_KO_VS_WT_TREG_UP	48	1.71246	0.00603622	0.0470272	pos
GSE34217_MIR17_92_OVEREXPRESS_VS_WT_ACT_CD8_TCELL_UP	16	1.71246	0.0126582	0.0469956	pos
GSE1432_CTRL_VS_IFNG_6H_MICROGLIA_DN	36	1.71187	0.00795229	0.0471946	pos
PID_CMYB_PATHWAY	20	1.71099	0.0132325	0.0474696	pos
REACTOME_OTHER_INTERLEUKIN_SIGNALING	52	1.71079	0.0117417	0.0475089	pos
BMI1_DN.V1_DN	21	1.71079	0.0203666	0.047475	pos
GSE45739_NRAS_KO_VS_WT_ACD3_ACD28_STIM_CD4_TCELL_DN	50	1.71048	0	0.0475537	pos
GO_RIBOSOMAL_LARGE_SUBUNIT_BIOGENESIS	18	1.70988	0.015873	0.0477366	pos
GO_LEUKOCYTE_MIGRATION	47	1.70923	0.00385356	0.0479224	pos
CHR17P13	26	1.70912	0.012	0.0479369	pos
GSE14000_UNSTIM_VS_4H_LPS_DC_TRANSLATED_RNA_DN	38	1.70852	0.00994036	0.0481263	pos
GSE7831_UNSTIM_VS_INFLUENZA_STIM_PDC_4H_DN	36	1.70799	0.0102459	0.04828	pos
GSE18893_TCONV_VS_TREG_2H_CULTURE_DN	46	1.70746	0.00208768	0.0484355	pos
LYF1_01	43	1.70702	0.0119522	0.0485818	pos
GSE14350_IL2RB_KO_VS_WT_TREG_UP	30	1.70625	0.020202	0.0488316	pos
GSE3720_UNSTIM_VS_PMA_STIM_VD1_GAMMADELTA_TCELL_UP	38	1.70602	0.0059761	0.0488917	pos
PID_FAK_PATHWAY	16	1.70498	0.0184805	0.0492504	pos
GSE24210_TCONV_VS_TREG_UP	29	1.70429	0.0119522	0.0494709	pos
GO_POSITIVE_REGULATION_OF_CYSTEINE_TYPE_ENDOPEPTIDASE_ACTIVITY	23	1.70384	0.0100402	0.0495884	pos
DIAZ_CHRONIC_MEYLOGENOUS_LEUKEMIA_UP	311	1.70374	0	0.0495906	pos
GSE42021_CD24LO_TREG_VS_CD24LO_TCONV_THYMUS_DN	36	1.70303	0.00761905	0.0498167	pos
GSE30971_CTRL_VS_LPS_STIM_MACROPHAGE_WBP7_KO_4H_DN	38	1.70288	0.00782779	0.0498287	pos
GSE20715_0H_VS_6H_OZONE_LUNG_UP	33	1.70273	0.0100604	0.0498548	pos
KIM_WT1_TARGETS_8HR_DN	24	1.70248	0.0116732	0.0499028	pos
GSE7460_WT_VS_FOXP3_HET_ACT_WITH_TGFB_TCONV_DN	36	1.70243	0.00773694	0.0498928	pos

## Sheet: SOX11-KD and DCX-KD overlap
DCX-KD_DOWN / SOX11-KD_DOWN overlap (q-values < 0,05)	DCX-KD_DOWN / SOX11-KD_UP overlap (q-values < 0,05)
BENPORATH_ES_1	5H_A_PHAGOCYTOPHILUM_STIM_NEUTROPHIL_UP
BENPORATH_PROLIFERATION	5H_BMDC_DN
CUI_TCF21_TARGETS_2_UP	5H_BMDC_UP
DUTERTRE_ESTRADIOL_RESPONSE_24HR_UP	5H_VS_24H_LPS_BMDC_DN
FISCHER_DREAM_TARGETS	5H_VS_24H_PAM3CSK4_BMDC_UP
FLORIO_NEOCORTEX_BASAL_RADIAL_GLIA_DN	5H_VS_24H_POLYIC_BMDC_UP
GNF2_RRM1	5H_VS_72H_IL4_AND_ANTI_IL12_ACT_CD4_TCELL_DN
GNF2_SMC4L1	5H_VS_8H_CPG_BMDC_UP
GO_CHROMOSOME_SEGREGATION	5H_VS_8H_GARDIQUIMOD_BMDC_UP
GO_DNA_REPLICATION	5H_VS_8H_LPS_BMDC_UP
GO_MRNA_3_END_PROCESSING	5_EFF_CD8_TCELL_UP
GO_MRNA_TRANSPORT	5_UP_EARLY
GO_NUCLEAR_CHROMOSOME_SEGREGATION	8H_UP
GO_TUBULIN_BINDING	ACEVEDO_LIVER_CANCER_DN
GRAHAM_NORMAL_QUIESCENT_VS_NORMAL_DIVIDING_DN	ACEVEDO_LIVER_TUMOR_VS_NORMAL_ADJACENT_TISSUE_UP
GSE22443_IL2_VS_IL12_TREATED_ACT_CD8_TCELL_UP	ACEVEDO_NORMAL_TISSUE_ADJACENT_TO_LIVER_TUMOR_DN
GSE30083_SP3_VS_SP4_THYMOCYTE_UP	AKT_UP
HADDAD_B_LYMPHOCYTE_PROGENITOR	ALCALAY_AML_BY_NPM1_LOCALIZATION_DN
HALLMARK_E2F_TARGETS	ALCALA_APOPTOSIS
HALLMARK_G2M_CHECKPOINT	ALONSO_METASTASIS_UP
KINSEY_TARGETS_OF_EWSR1_FLII_FUSION_UP	AMIT_EGF_RESPONSE_480_HELA
KOBAYASHI_EGFR_SIGNALING_24HR_DN	AP1FJ_Q2
KRAS,600,LUNG,BREAST_UP,V1_UP	AP1_01
OCT1_B	AP1_Q4
ODONNELL_TFRC_TARGETS_DN	AP1_Q6_01
PUJANA_BRCA2_PCC_NETWORK	BERENJENO_TRANSFORMED_BY_RHOA_DN
PUJANA_BRCA_CENTERED_NETWORK	BHATI_G2M_ARREST_BY_2METHOXYESTRADIOL_DN
PUJANA_XPRSS_INT_NETWORK	BILANGES_RAPAMYCIN_SENSITIVE_VIA_TSC1_AND_TSC2
ROSTY_CERVICAL_CANCER_PROLIFERATION_CLUSTER	BILANGES_SERUM_AND_RAPAMYCIN_SENSITIVE_GENES
WHITFIELD_CELL_CYCLE_S	BLUM_RESPONSE_TO_SALIRASIB_UP
ZHOU_CELL_CYCLE_GENES_IN_IR_RESPONSE_6HR	BMI1_DN
	BRUINS_UVC_RESPONSE_LATE
	BURTON_ADIPOGENESIS_5
	BURTON_ADIPOGENESIS_6
	BUYTAERT_PHOTODYNAMIC_THERAPY_STRESS_DN
	CETS1P54_01
	CHAUHAN_RESPONSE_TO_METHOXYESTRADIOL_DN
	CHEN_LVAD_SUPPORT_OF_FAILING_HEART_UP
	CHEN_METABOLIC_SYNDROM_NETWORK
	CHR17P13
	CHR17Q25
	CHR1P34
	CHR1P36
	CHR6P21
	CHRXP11
	CONCANNON_APOPTOSIS_BY_EPOXOMICIN_UP
	CREIGHTON_ENDOCRINE_THERAPY_RESISTANCE_1
	DAVICIONI_MOLECULAR_ARMS_VS_ERMS_DN
	DAZARD_UV_RESPONSE_CLUSTER_G1
	DELYS_THYROID_CANCER_UP
	DIAZ_CHRONIC_MEYLOGENOUS_LEUKEMIA_UP
	DITTMER_PTHLH_TARGETS_UP
	EGFR_UP
	ENK_UV_RESPONSE_EPIDERMIS_UP
	ENK_UV_RESPONSE_KERATINOCYTE_UP
	ESC_J1_UP_LATE
	ESC_V6
	FEVR_CTNNB1_TARGETS_UP
	FULCHER_INFLAMMATORY_RESPONSE_LECTIN_VS_LPS_UP
	GALINDO_IMMUNE_RESPONSE_TO_ENTEROTOXIN
	GARY_CD5_TARGETS_UP
	GAVIN_FOXP3_TARGETS_CLUSTER_T7
	GCGNNANTTCC_UNKNOWN
	GCM_ACTG1
	GCM_CSNK2B
	GCM_NPM1
	GCM_PSME1
	GCM_TPT1
	GGAANCGGAANY_UNKNOWN
	GGGYGTGNY_UNKNOWN
	GNF2_DAP3
	GNF2_EIF3S6
	GNF2_FBL
	GNF2_ST13
	GNF2_TPT1
	GOTZMANN_EPITHELIAL_TO_MESENCHYMAL_TRANSITION_DN
	GO_ACTIN_CYTOSKELETON
	GO_ACTIVATION_OF_IMMUNE_RESPONSE
	GO_ACTIVATION_OF_INNATE_IMMUNE_RESPONSE
	GO_AMIDE_BINDING
	GO_AMIDE_BIOSYNTHETIC_PROCESS
	GO_ANCHORING_JUNCTION
	GO_ANTIGEN_PROCESSING_AND_PRESENTATION
	GO_ANTIGEN_PROCESSING_AND_PRESENTATION_OF_PEPTIDE_ANTIGEN
	GO_ATP_SYNTHESIS_COUPLED_ELECTRON_TRANSPORT
	GO_AZUROPHIL_GRANULE
	GO_AZUROPHIL_GRANULE_LUMEN
	GO_BLOOD_VESSEL_ENDOTHELIAL_CELL_MIGRATION
	GO_CADHERIN_BINDING
	GO_CARBOHYDRATE_CATABOLIC_PROCESS
	GO_CARBOHYDRATE_DERIVATIVE_METABOLIC_PROCESS
	GO_CARBOHYDRATE_METABOLIC_PROCESS
	GO_CELLULAR_AMIDE_METABOLIC_PROCESS
	GO_CELLULAR_LIPID_CATABOLIC_PROCESS
	GO_CELLULAR_LIPID_METABOLIC_PROCESS
	GO_CELLULAR_MACROMOLECULE_LOCALIZATION
	GO_CELLULAR_RESPONSE_TO_TOPOLOGICALLY_INCORRECT_PROTEIN
	GO_CELLULAR_RESPONSE_TO_TOXIC_SUBSTANCE
	GO_CELL_ACTIVATION
	GO_CELL_ACTIVATION_INVOLVED_IN_IMMUNE_RESPONSE
	GO_CELL_ADHESION_MOLECULE_BINDING
	GO_CELL_SUBSTRATE_JUNCTION
	GO_COAGULATION
	GO_COATED_MEMBRANE
	GO_COATED_VESICLE
	GO_COATED_VESICLE_MEMBRANE
	GO_COENZYME_BINDING
	GO_COFACTOR_METABOLIC_PROCESS
	GO_COTRANSLATIONAL_PROTEIN_TARGETING_TO_MEMBRANE
	GO_CYTOKINE_MEDIATED_SIGNALING_PATHWAY
	GO_CYTOKINE_RECEPTOR_BINDING
	GO_CYTOPLASMIC_VESICLE_PART
	GO_CYTOSOLIC_LARGE_RIBOSOMAL_SUBUNIT
	GO_CYTOSOLIC_PART
	GO_CYTOSOLIC_RIBOSOME
	GO_CYTOSOLIC_SMALL_RIBOSOMAL_SUBUNIT
	GO_DEFENSE_RESPONSE
	GO_ELECTRON_TRANSFER_ACTIVITY
	GO_ENDOPLASMIC_RETICULUM
	GO_ENDOPLASMIC_RETICULUM_LUMEN
	GO_ENDOPLASMIC_RETICULUM_PART
	GO_ENDOPLASMIC_RETICULUM_TO_GOLGI_VESICLE_MEDIATED_TRANSPORT
	GO_ENDOPLASMIC_RETICULUM_UNFOLDED_PROTEIN_RESPONSE
	GO_ENDOSOMAL_PART
	GO_ENDOSOME
	GO_ENZYME_INHIBITOR_ACTIVITY
	GO_ESTABLISHMENT_OF_PROTEIN_LOCALIZATION_TO_ENDOPLASMIC_RETICULUM
	GO_ESTABLISHMENT_OF_PROTEIN_LOCALIZATION_TO_MEMBRANE
	GO_ESTABLISHMENT_OF_PROTEIN_LOCALIZATION_TO_ORGANELLE
	GO_EXOCYTOSIS
	GO_FATTY_ACID_METABOLIC_PROCESS
	GO_FICOLIN_1_RICH_GRANULE
	GO_GOLGI_APPARATUS
	GO_GOLGI_APPARATUS_PART
	GO_GOLGI_ASSOCIATED_VESICLE
	GO_GOLGI_MEMBRANE
	GO_GOLGI_VESICLE_TRANSPORT
	GO_HYDROLASE_ACTIVITY_ACTING_ON_GLYCOSYL_BONDS
	GO_HYDROLASE_ACTIVITY_HYDROLYZING_O_GLYCOSYL_COMPOUNDS
	GO_IMMUNE_EFFECTOR_PROCESS
	GO_INNATE_IMMUNE_RESPONSE
	GO_INNER_MITOCHONDRIAL_MEMBRANE_PROTEIN_COMPLEX
	GO_INTERSPECIES_INTERACTION_BETWEEN_ORGANISMS
	GO_INTRACELLULAR_PROTEIN_TRANSPORT
	GO_INTRACELLULAR_TRANSPORT
	GO_I_KAPPAB_KINASE_NF_KAPPAB_SIGNALING
	GO_LARGE_RIBOSOMAL_SUBUNIT
	GO_LEUKOCYTE_MEDIATED_IMMUNITY
	GO_LIPID_BINDING
	GO_LIPID_METABOLIC_PROCESS
	GO_LYASE_ACTIVITY
	GO_LYSOSOMAL_LUMEN
	GO_MACROMOLECULE_CATABOLIC_PROCESS
	GO_MICROBODY
	GO_MICROBODY_PART
	GO_MITOCHONDRIAL_MATRIX
	GO_MITOCHONDRIAL_MEMBRANE_PART
	GO_MITOCHONDRIAL_PART
	GO_MITOCHONDRIAL_PROTEIN_COMPLEX
	GO_MITOCHONDRION
	GO_MONOCARBOXYLIC_ACID_METABOLIC_PROCESS
	GO_MULTI_MULTICELLULAR_ORGANISM_PROCESS
	GO_MYELOID_LEUKOCYTE_ACTIVATION
	GO_MYELOID_LEUKOCYTE_MEDIATED_IMMUNITY
	GO_NEGATIVE_REGULATION_OF_CATALYTIC_ACTIVITY
	GO_NEGATIVE_REGULATION_OF_CELLULAR_PROTEIN_CATABOLIC_PROCESS
	GO_NEGATIVE_REGULATION_OF_PEPTIDASE_ACTIVITY
	GO_NEGATIVE_REGULATION_OF_PROTEIN_CATABOLIC_PROCESS
	GO_NEGATIVE_REGULATION_OF_PROTEOLYSIS
	GO_NEGATIVE_REGULATION_OF_RESPONSE_TO_STIMULUS
	GO_NUCLEAR_OUTER_MEMBRANE_ENDOPLASMIC_RETICULUM_MEMBRANE_NETWORK
	GO_NUCLEAR_TRANSCRIBED_MRNA_CATABOLIC_PROCESS
	GO_NUCLEAR_TRANSCRIBED_MRNA_CATABOLIC_PROCESS_NONSENSE_MEDIATED_DECAY
	GO_NUCLEOSIDE_BISPHOSPHATE_METABOLIC_PROCESS
	GO_ORGANELLE_ENVELOPE_LUMEN
	GO_ORGANELLE_SUBCOMPARTMENT
	GO_ORGANIC_ACID_CATABOLIC_PROCESS
	GO_ORGANIC_ACID_METABOLIC_PROCESS
	GO_ORGANONITROGEN_COMPOUND_BIOSYNTHETIC_PROCESS
	GO_ORGANONITROGEN_COMPOUND_CATABOLIC_PROCESS
	GO_OUTER_MEMBRANE
	GO_OXIDATION_REDUCTION_PROCESS
	GO_OXIDATIVE_PHOSPHORYLATION
	GO_OXIDOREDUCTASE_ACTIVITY
	GO_PATTERN_RECOGNITION_RECEPTOR_SIGNALING_PATHWAY
	GO_PEPTIDE_BIOSYNTHETIC_PROCESS
	GO_PERINUCLEAR_REGION_OF_CYTOPLASM
	GO_PEROXISOMAL_TRANSPORT
	GO_PEROXISOME_ORGANIZATION
	GO_PHAGOCYTOSIS
	GO_PIGMENT_GRANULE
	GO_POLYSOME
	GO_POSITIVE_REGULATION_OF_BINDING
	GO_POSITIVE_REGULATION_OF_DEFENSE_RESPONSE
	GO_POSITIVE_REGULATION_OF_IMMUNE_RESPONSE
	GO_POSITIVE_REGULATION_OF_IMMUNE_SYSTEM_PROCESS
	GO_POSITIVE_REGULATION_OF_INTRACELLULAR_SIGNAL_TRANSDUCTION
	GO_POSITIVE_REGULATION_OF_I_KAPPAB_KINASE_NF_KAPPAB_SIGNALING
	GO_POSITIVE_REGULATION_OF_MAPK_CASCADE
	GO_POSITIVE_REGULATION_OF_PHOSPHORUS_METABOLIC_PROCESS
	GO_POSITIVE_REGULATION_OF_PROTEIN_METABOLIC_PROCESS
	GO_POSITIVE_REGULATION_OF_PROTEIN_MODIFICATION_PROCESS
	GO_POSITIVE_REGULATION_OF_PROTEOLYSIS
	GO_POSITIVE_REGULATION_OF_SIGNALING
	GO_PROTEASE_BINDING
	GO_PROTEIN_CONTAINING_COMPLEX_BINDING
	GO_PROTEIN_LOCALIZATION_TO_CELL_PERIPHERY
	GO_PROTEIN_LOCALIZATION_TO_ENDOPLASMIC_RETICULUM
	GO_PROTEIN_LOCALIZATION_TO_MEMBRANE
	GO_PROTEIN_LOCALIZATION_TO_PLASMA_MEMBRANE
	GO_PROTEIN_TARGETING
	GO_PROTEIN_TARGETING_TO_MEMBRANE
	GO_PROTEOLYSIS
	GO_PROTON_TRANSMEMBRANE_TRANSPORT
	GO_REGULATION_OF_BINDING
	GO_REGULATION_OF_BODY_FLUID_LEVELS
	GO_REGULATION_OF_CELLULAR_PROTEIN_CATABOLIC_PROCESS
	GO_REGULATION_OF_CYSTEINE_TYPE_ENDOPEPTIDASE_ACTIVITY
	GO_REGULATION_OF_DEFENSE_RESPONSE
	GO_REGULATION_OF_IMMUNE_RESPONSE
	GO_REGULATION_OF_IMMUNE_SYSTEM_PROCESS
	GO_REGULATION_OF_INNATE_IMMUNE_RESPONSE
	GO_REGULATION_OF_PEPTIDASE_ACTIVITY
	GO_REGULATION_OF_PROTEIN_BINDING
	GO_REGULATION_OF_PROTEIN_CATABOLIC_PROCESS
	GO_REGULATION_OF_PROTEIN_LOCALIZATION_TO_PLASMA_MEMBRANE
	GO_REGULATION_OF_PROTEOLYSIS
	GO_REGULATION_OF_RESPONSE_TO_STRESS
	GO_RESPIRASOME
	GO_RESPIRATORY_CHAIN_COMPLEX
	GO_RESPONSE_TO_ANTIBIOTIC
	GO_RESPONSE_TO_CYTOKINE
	GO_RESPONSE_TO_ENDOPLASMIC_RETICULUM_STRESS
	GO_RESPONSE_TO_ESTRADIOL
	GO_RESPONSE_TO_HYDROGEN_PEROXIDE
	GO_RESPONSE_TO_INTERFERON_GAMMA
	GO_RESPONSE_TO_OXYGEN_LEVELS
	GO_RIBOSOMAL_LARGE_SUBUNIT_BIOGENESIS
	GO_RIBOSOMAL_SUBUNIT
	GO_RIBOSOME
	GO_RRNA_BINDING
	GO_SECRETION
	GO_SECRETORY_GRANULE
	GO_SECRETORY_GRANULE_MEMBRANE
	GO_SECRETORY_VESICLE
	GO_SIGNALING_RECEPTOR_BINDING
	GO_SIGNAL_TRANSDUCTION_BY_PROTEIN_PHOSPHORYLATION
	GO_SKELETAL_SYSTEM_MORPHOGENESIS
	GO_SMALL_MOLECULE_CATABOLIC_PROCESS
	GO_SMALL_MOLECULE_METABOLIC_PROCESS
	GO_SMALL_RIBOSOMAL_SUBUNIT
	GO_STEROL_METABOLIC_PROCESS
	GO_STRESS_ACTIVATED_PROTEIN_KINASE_SIGNALING_CASCADE
	GO_STRUCTURAL_CONSTITUENT_OF_RIBOSOME
	GO_STRUCTURAL_MOLECULE_ACTIVITY
	GO_SULFUR_COMPOUND_BINDING
	GO_SULFUR_COMPOUND_METABOLIC_PROCESS
	GO_TOLL_LIKE_RECEPTOR_SIGNALING_PATHWAY
	GO_TRANSLATIONAL_INITIATION
	GO_TRANSPORT_VESICLE
	GO_VACUOLAR_LUMEN
	GO_VACUOLAR_MEMBRANE
	GO_VACUOLAR_PART
	GO_VACUOLE
	GO_VACUOLE_ORGANIZATION
	GO_VESICLE_COAT
	GO_VESICLE_LUMEN
	GO_VESICLE_MEMBRANE
	GO_VIRAL_GENE_EXPRESSION
	GO_VITAMIN_BINDING
	GO_VITAMIN_METABOLIC_PROCESS
	GO_WHOLE_MEMBRANE
	GRAESSMANN_APOPTOSIS_BY_DOXORUBICIN_UP
	GRUETZMANN_PANCREATIC_CANCER_DN
	GSE10239_NAIVE_VS_DAY4
	GSE10240_CTRL_VS_IL17_STIM_PRIMARY_BRONCHIAL_EPITHELIAL_CELLS_DN
	GSE10325_BCELL_VS_MYELOID_DN
	GSE10325_CD4_TCELL_VS_LUPUS_CD4_TCELL_UP
	GSE10325_LUPUS_BCELL_VS_LUPUS_MYELOID_DN
	GSE10325_LUPUS_CD4_TCELL_VS_LUPUS_MYELOID_DN
	GSE11864_CSF1_IFNG_VS_CSF1_IFNG_PAM3CYS_IN_MAC_UP
	GSE11864_CSF1_VS_CSF1_IFNG_IN_MAC_DN
	GSE11961_FOLLICULAR_BCELL_VS_MARGINAL_ZONE_BCELL_DN
	GSE11961_FOLLICULAR_BCELL_VS_MEMORY_BCELL_DAY7_UP
	GSE11961_MARGINAL_ZONE_BCELL_VS_GERMINAL_CENTER_BCELL_DAY40_DN
	GSE12366_GC_BCELL_VS_PLASMA_CELL_DN
	GSE12392_CD8A_POS_VS_NEG_SPLEEN_IFNB_KO_DC_UP
	GSE12392_IFNAR_KO_VS_IFNB_KO_CD8_NEG_SPLEEN_DC_DN
	GSE12845_IGD_NEG_BLOOD_VS_DARKZONE_GC_TONSIL_BCELL_UP
	GSE12845_IGD_NEG_BLOOD_VS_NAIVE_TONSIL_BCELL_UP
	GSE12845_IGD_NEG_BLOOD_VS_PRE_GC_TONSIL_BCELL_UP
	GSE12845_IGD_POS_BLOOD_VS_NAIVE_TONSIL_BCELL_UP
	GSE12845_IGD_POS_BLOOD_VS_PRE_GC_TONSIL_BCELL_UP
	GSE12845_IGD_POS_VS_NEG_BLOOD_BCELL_DN
	GSE12845_PRE_GC_VS_DARKZONE_GC_TONSIL_BCELL_UP
	GSE13411_NAIVE_VS_IGM_MEMORY_BCELL_DN
	GSE13411_NAIVE_VS_MEMORY_BCELL_DN
	GSE13411_NAIVE_VS_SWITCHED_MEMORY_BCELL_DN
	GSE13411_PLASMA_CELL_VS_MEMORY_BCELL_UP
	GSE13738_RESTING_VS_BYSTANDER_ACTIVATED_CD4_TCELL_DN
	GSE13738_RESTING_VS_TCR_ACTIVATED_CD4_TCELL_DN
	GSE14000_4H_VS_16H_LPS_DC_TRANSLATED_RNA_UP
	GSE14000_TRANSLATED_RNA_VS_MRNA_DC_DN
	GSE1432_1H_VS_24H_IFNG_MICROGLIA_UP
	GSE14350_IL2RB_KO_VS_WT_TREG_UP
	GSE1460_CD4_THYMOCYTE_VS_NAIVE_CD4_TCELL_ADULT_BLOOD_DN
	GSE1460_DP_THYMOCYTE_VS_NAIVE_CD4_TCELL_ADULT_BLOOD_DN
	GSE1460_DP_THYMOCYTE_VS_NAIVE_CD4_TCELL_CORD_BLOOD_DN
	GSE14769_20MIN_VS_360MIN_LPS_BMDM_UP
	GSE15330_HSC_VS_MEGAKARYOCYTE_ERYTHROID_PROGENITOR_IKAROS_KO_UP
	GSE15330_LYMPHOID_MULTIPOTENT_VS_GRANULOCYTE_MONOCYTE_PROGENITOR_IKAROS_KO_DN
	GSE15330_WT_VS_IKAROS_KO_HSC_UP
	GSE15735_CTRL_VS_HDAC_INHIBITOR_TREATED_CD4_TCELL_12H_DN
	GSE15735_CTRL_VS_HDAC_INHIBITOR_TREATED_CD4_TCELL_12H_UP
	GSE15930_NAIVE_VS_72H_IN_VITRO_STIM_IL12_CD8_TCELL_DN
	GSE15930_STIM_VS_STIM_AND_IFNAB_48H_CD8_T_CELL_UP
	GSE16385_IFNG_TNF_VS_IL4_STIM_MACROPHAGE_ROSIGLITAZONE_TREATED_DN
	GSE16385_MONOCYTE_VS_12H_IFNG_TNF_TREATED_MACROPHAGE_UP
	GSE16385_MONOCYTE_VS_12H_ROSIGLITAZONE_IL4_TREATED_MACROPHAGE_DN
	GSE16385_ROSIGLITAZONE_VS_UNTREATED_IFNG_TNF_STIM_MACROPHAGE_DN
	GSE16522_ANTI_CD3CD28_STIM_VS_UNSTIM_MEMORY_CD8_TCELL_DN
	GSE16697_CD4_TCELL_VS_TFH_CD4_TCELL_UP
	GSE17186_CD21LOW_VS_CD21HIGH_TRANSITIONAL_BCELL_CORD_BLOOD_DN
	GSE17186_CD21LOW_VS_CD21HIGH_TRANSITIONAL_BCELL_CORD_BLOOD_UP
	GSE17186_NAIVE_VS_CD21HIGH_TRANSITIONAL_BCELL_CORD_BLOOD_UP
	GSE17580_UNINFECTED_VS_S_MANSONI_INF_TREG_DN
	GSE17721_0
	GSE17721_12H_VS_24H_LPS_BMDC_UP
	GSE17721_ALL_VS_24H_PAM3CSK4_BMDC_DN
	GSE17721_ALL_VS_24H_PAM3CSK4_BMDC_UP
	GSE17721_CTRL_VS_LPS_0
	GSE17721_CTRL_VS_LPS_12H_BMDC_UP
	GSE17721_CTRL_VS_LPS_24H_BMDC_DN
	GSE17721_CTRL_VS_PAM3CSK4_12H_BMDC_UP
	GSE17721_CTRL_VS_PAM3CSK4_6H_BMDC_UP
	GSE17721_CTRL_VS_POLYIC_0
	GSE17721_CTRL_VS_POLYIC_6H_BMDC_UP
	GSE17721_LPS_VS_CPG_6H_BMDC_UP
	GSE17721_LPS_VS_GARDIQUIMOD_0
	GSE17721_LPS_VS_GARDIQUIMOD_16H_BMDC_UP
	GSE17721_LPS_VS_GARDIQUIMOD_8H_BMDC_UP
	GSE17721_LPS_VS_PAM3CSK4_24H_BMDC_DN
	GSE17721_LPS_VS_PAM3CSK4_8H_BMDC_UP
	GSE17721_LPS_VS_POLYIC_24H_BMDC_UP
	GSE17721_PAM3CSK4_VS_CPG_8H_BMDC_UP
	GSE17721_PAM3CSK4_VS_GADIQUIMOD_6H_BMDC_UP
	GSE17721_POLYIC_VS_PAM3CSK4_12H_BMDC_DN
	GSE1791_CTRL_VS_NEUROMEDINU_IN_T_CELL_LINE_0
	GSE1791_CTRL_VS_NEUROMEDINU_IN_T_CELL_LINE_12H_DN
	GSE17974_0
	GSE17974_0H_VS_4H_IN_VITRO_ACT_CD4_TCELL_DN
	GSE17974_2H_VS_72H_UNTREATED_IN_VITRO_CD4_TCELL_DN
	GSE18281_CORTEX_VS_MEDULLA_THYMUS_DN
	GSE18281_CORTICAL_VS_MEDULLARY_THYMOCYTE_UP
	GSE18281_SUBCAPSULAR_VS_PERIMEDULLARY_CORTICAL_REGION_OF_THYMUS_UP
	GSE18791_CTRL_VS_NEWCASTLE_VIRUS_DC_18H_UP
	GSE18804_SPLEEN_MACROPHAGE_VS_COLON_TUMORAL_MACROPHAGE_UP
	GSE18804_SPLEEN_MACROPHAGE_VS_TUMORAL_MACROPHAGE_DN
	GSE18893_TCONV_VS_TREG_24H_CULTURE_UP
	GSE18893_TCONV_VS_TREG_2H_CULTURE_UP
	GSE19198_1H_VS_6H_IL21_TREATED_TCELL_DN
	GSE1925_CTRL_VS_3H_IFNG_STIM_IFNG_PRIMED_MACROPHAGE_UP
	GSE19401_NAIVE_VS_IMMUNIZED_MOUSE_PLN_FOLLICULAR_DC_UP
	GSE19401_PAM2CSK4_VS_RETINOIC_ACID_AND_PAM2CSK4_STIM_FOLLICULAR_DC_DN
	GSE19401_UNSTIM_VS_PAM2CSK4_STIM_FOLLICULAR_DC_DN
	GSE19401_UNSTIM_VS_RETINOIC_ACID_STIM_FOLLICULAR_DC_UP
	GSE19825_NAIVE_VS_DAY3_EFF_CD8_TCELL_DN
	GSE19888_ADENOSINE_A3R_INH_PRETREAT_AND_ACT_BY_A3R_VS_TCELL_MEMBRANES_ACT_MAST_CELL_DN
	GSE19923_E2A_KO_VS_E2A_AND_HEB_KO_DP_THYMOCYTE_DN
	GSE19941_IL10_KO_VS_IL10_KO_AND_NFKBP50_KO_LPS_STIM_MACROPHAGE_DN
	GSE20715_0H_VS_6H_OZONE_LUNG_UP
	GSE20727_CTRL_VS_DNFB_ALLERGEN_TREATED_DC_DN
	GSE20727_CTRL_VS_ROS_INHIBITOR_TREATED_DC_UP
	GSE21360_NAIVE_VS_SECONDARY_MEMORY_CD8_TCELL_DN
	GSE21380_TFH_VS_GERMINAL_CENTER_TFH_CD4_TCELL_UP
	GSE21546_SAP1A_KO_VS_SAP1A_KO_AND_ELK1_KO_ANTI_CD3_STIM_DP_THYMOCYTES_DN
	GSE21927_BALBC_VS_C57BL6_MONOCYTE_TUMOR_UP
	GSE21927_SPLEEN_C57BL6_VS_4T1_TUMOR_BALBC_MONOCYTES_UP
	GSE21927_SPLEEN_VS_BONE_MARROW_MONOCYTE_BALBC_DN
	GSE22103_UNSTIM_VS_LPS_STIM_NEUTROPHIL_DN
	GSE22140_GERMFREE_VS_SPF_ARTHRITIC_MOUSE_CD4_TCELL_DN
	GSE22140_GERMFREE_VS_SPF_MOUSE_CD4_TCELL_DN
	GSE22140_HEALTHY_VS_ARTHRITIC_GERMFREE_MOUSE_CD4_TCELL_DN
	GSE22140_HEALTHY_VS_ARTHRITIC_MOUSE_CD4_TCELL_UP
	GSE22196_HEALTHY_VS_OBESE_MOUSE_SKIN_GAMMADELTA_TCELL_DN
	GSE22196_HEALTHY_VS_OBESE_MOUSE_SKIN_GAMMADELTA_TCELL_UP
	GSE22443_IL2_VS_IL12_TREATED_ACT_CD8_TCELL_DN
	GSE22443_NAIVE_VS_ACT_AND_IL12_TREATED_CD8_TCELL_UP
	GSE22886_CTRL_VS_LPS_24H_DC_UP
	GSE22886_DAY0_VS_DAY1_MONOCYTE_IN_CULTURE_DN
	GSE22886_DAY0_VS_DAY1_MONOCYTE_IN_CULTURE_UP
	GSE22886_DAY0_VS_DAY7_MONOCYTE_IN_CULTURE_DN
	GSE22886_DAY1_VS_DAY7_MONOCYTE_IN_CULTURE_DN
	GSE22886_DC_VS_MONOCYTE_UP
	GSE22886_IGA_VS_IGM_MEMORY_BCELL_UP
	GSE22886_IGM_MEMORY_BCELL_VS_BM_PLASMA_CELL_DN
	GSE22886_NAIVE_BCELL_VS_BM_PLASMA_CELL_DN
	GSE22886_NAIVE_BCELL_VS_DC_DN
	GSE22886_NAIVE_BCELL_VS_MONOCYTE_DN
	GSE22886_NAIVE_BCELL_VS_NEUTROPHIL_DN
	GSE22886_NAIVE_CD4_TCELL_VS_12H_ACT_TH2_UP
	GSE22886_NAIVE_CD4_TCELL_VS_DC_DN
	GSE22886_NAIVE_CD4_TCELL_VS_MONOCYTE_DN
	GSE22886_NAIVE_CD8_TCELL_VS_DC_DN
	GSE22886_NAIVE_VS_IGG_IGA_MEMORY_BCELL_DN
	GSE22886_NAIVE_VS_IGM_MEMORY_BCELL_DN
	GSE22886_NEUTROPHIL_VS_DC_DN
	GSE22886_NEUTROPHIL_VS_MONOCYTE_DN
	GSE22886_TCELL_VS_BCELL_NAIVE_UP
	GSE22886_UNSTIM_VS_STIM_MEMORY_TCELL_UP
	GSE22935_UNSTIM_VS_12H_MBOVIS_BCG_STIM_MACROPHAGE_DN
	GSE22935_UNSTIM_VS_12H_MBOVIS_BCG_STIM_MACROPHAGE_UP
	GSE22935_UNSTIM_VS_24H_MBOVIS_BCG_STIM_MACROPHAGE_UP
	GSE22935_WT_VS_MYD88_KO_MACROPHAGE_48H_MBOVIS_BCG_STIM_DN
	GSE22935_WT_VS_MYD88_KO_MACROPHAGE_UP
	GSE23308_WT_VS_MINERALCORTICOID_REC_KO_MACROPHAGE_UP
	GSE23568_CTRL_TRANSDUCED_VS_WT_CD8_TCELL_UP
	GSE23568_ID3_TRANSDUCED_VS_ID3_KO_CD8_TCELL_UP
	GSE24026_PD1_LIGATION_VS_CTRL_IN_ACT_TCELL_LINE_UP
	GSE2405_0H_VS_1
	GSE2405_0H_VS_24H_A_PHAGOCYTOPHILUM_STIM_NEUTROPHIL_UP
	GSE2405_0H_VS_9H_A_PHAGOCYTOPHILUM_STIM_NEUTROPHIL_DN
	GSE2405_HEAT_KILLED_LYSATE_VS_LIVE_A_PHAGOCYTOPHILUM_STIM_NEUTROPHIL_24H_UP
	GSE24142_DN2_VS_DN3_THYMOCYTE_ADULT_UP
	GSE24142_EARLY_THYMIC_PROGENITOR_VS_DN2_THYMOCYTE_ADULT_DN
	GSE24210_TCONV_VS_TREG_DN
	GSE24634_IL4_VS_CTRL_TREATED_NAIVE_CD4_TCELL_DAY10_DN
	GSE24634_IL4_VS_CTRL_TREATED_NAIVE_CD4_TCELL_DAY5_DN
	GSE24634_IL4_VS_CTRL_TREATED_NAIVE_CD4_TCELL_DAY5_UP
	GSE24634_IL4_VS_CTRL_TREATED_NAIVE_CD4_TCELL_DAY7_DN
	GSE24634_TEFF_VS_TCONV_DAY10_IN_CULTURE_DN
	GSE24634_TEFF_VS_TCONV_DAY3_IN_CULTURE_DN
	GSE24634_TEFF_VS_TCONV_DAY5_IN_CULTURE_DN
	GSE24634_TEFF_VS_TCONV_DAY7_IN_CULTURE_DN
	GSE24634_TREG_VS_TCONV_POST_DAY10_IL4_CONVERSION_DN
	GSE24634_TREG_VS_TCONV_POST_DAY3_IL4_CONVERSION_DN
	GSE25088_CTRL_VS_IL4_STIM_STAT6_KO_MACROPHAGE_DN
	GSE25088_ROSIGLITAZONE_VS_IL4_AND_ROSIGLITAZONE_STIM_STAT6_KO_MACROPHAGE_DAY10_DN
	GSE25123_CTRL_VS_IL4_STIM_MACROPHAGE_UP
	GSE2585_CTEC_VS_MTEC_THYMUS_UP
	GSE2585_THYMIC_DC_VS_THYMIC_MACROPHAGE_DN
	GSE2585_THYMIC_MACROPHAGE_VS_MTEC_UP
	GSE26030_TH1_VS_TH17_DAY15_POST_POLARIZATION_DN
	GSE26030_TH1_VS_TH17_DAY5_POST_POLARIZATION_DN
	GSE26030_TH1_VS_TH17_RESTIMULATED_DAY15_POST_POLARIZATION_DN
	GSE26030_TH1_VS_TH17_RESTIMULATED_DAY5_POST_POLARIZATION_UP
	GSE26030_UNSTIM_VS_RESTIM_TH17_DAY15_POST_POLARIZATION_DN
	GSE26030_UNSTIM_VS_RESTIM_TH17_DAY5_POST_POLARIZATION_DN
	GSE26030_UNSTIM_VS_RESTIM_TH1_DAY5_POST_POLARIZATION_DN
	GSE26156_DOUBLE_POSITIVE_VS_CD4_SINGLE_POSITIVE_THYMOCYTE_UP
	GSE26488_CTRL_VS_PEPTIDE_INJECTION_HDAC7_DELTAP_TG_OT2_THYMOCYTE_DN
	GSE26488_WT_VS_VP16_TRANSGENIC_HDAC7_KO_DOUBLE_POSITIVE_THYMOCYTE_UP
	GSE26890_CXCR1_NEG_VS_POS_EFFECTOR_CD8_TCELL_DN
	GSE2706_2H_VS_8H_R848_AND_LPS_STIM_DC_UP
	GSE2706_2H_VS_8H_R848_STIM_DC_UP
	GSE27241_CTRL_VS_DIGOXIN_TREATED_CD4_TCELL_IN_TH17_POLARIZING_CONDITIONS_DN
	GSE27670_BLIMP1_VS_LMP1_TRANSDUCED_GC_BCELL_UP
	GSE2770_IL12_AND_TGFB_ACT_VS_ACT_CD4_TCELL_2H_UP
	GSE2770_IL4_ACT_VS_ACT_CD4_TCELL_6H_UP
	GSE2770_TGFB_AND_IL4_ACT_VS_ACT_CD4_TCELL_48H_DN
	GSE2770_TGFB_AND_IL4_VS_IL12_TREATED_ACT_CD4_TCELL_48H_UP
	GSE2770_TGFB_AND_IL4_VS_IL4_TREATED_ACT_CD4_TCELL_48H_DN
	GSE2770_UNTREATED_VS_ACT_CD4_TCELL_2H_UP
	GSE2770_UNTREATED_VS_ACT_CD4_TCELL_6H_UP
	GSE2770_UNTREATED_VS_IL12_TREATED_ACT_CD4_TCELL_2H_UP
	GSE2770_UNTREATED_VS_IL4_TREATED_ACT_CD4_TCELL_6H_UP
	GSE27786_BCELL_VS_NEUTROPHIL_DN
	GSE27786_CD8_TCELL_VS_NKTCELL_DN
	GSE27786_LIN_NEG_VS_BCELL_DN
	GSE2826_WT_VS_BTK_KO_BCELL_DN
	GSE29164_DAY3_VS_DAY7_UNTREATED_MELANOMA_DN
	GSE29164_UNTREATED_VS_CD8_TCELL_AND_IL12_TREATED_MELANOMA_DAY7_DN
	GSE29164_UNTREATED_VS_CD8_TCELL_TREATED_MELANOMA_DAY7_UP
	GSE29614_CTRL_VS_DAY3_TIV_FLU_VACCINE_PBMC_UP
	GSE29617_CTRL_VS_DAY3_TIV_FLU_VACCINE_PBMC_2008_DN
	GSE29618_BCELL_VS_MDC_DAY7_FLU_VACCINE_DN
	GSE29618_BCELL_VS_MDC_DN
	GSE29618_BCELL_VS_MONOCYTE_DAY7_FLU_VACCINE_DN
	GSE29618_BCELL_VS_PDC_DN
	GSE29618_LAIV_VS_TIV_FLU_VACCINE_DAY7_MONOCYTE_DN
	GSE29618_MONOCYTE_VS_MDC_DN
	GSE29618_MONOCYTE_VS_MDC_UP
	GSE29949_CD8_NEG_DC_SPLEEN_VS_CD8_POS_DC_SPLEEN_UP
	GSE29949_MICROGLIA_BRAIN_VS_CD8_POS_DC_SPLEEN_DN
	GSE3039_ALPHAALPHA_VS_ALPHABETA_CD8_TCELL_UP
	GSE3039_CD4_TCELL_VS_B1_BCELL_UP
	GSE3039_CD4_TCELL_VS_B2_BCELL_UP
	GSE3039_NKT_CELL_VS_ALPHAALPHA_CD8_TCELL_DN
	GSE32034_LY6C_HIGH_VS_LOW_ROSIGLIZATONE_TREATED_MONOCYTE_UP
	GSE32164_ALTERNATIVELY_ACT_M2_VS_CMYC_INHIBITED_MACROPHAGE_UP
	GSE32164_RESTING_DIFFERENTIATED_VS_CMYC_INHIBITED_MACROPHAGE_DN
	GSE32423_CTRL_VS_IL4_MEMORY_CD8_TCELL_DN
	GSE32423_CTRL_VS_IL7_IL4_MEMORY_CD8_TCELL_DN
	GSE32423_IL7_VS_IL7_IL4_NAIVE_CD8_TCELL_UP
	GSE32423_MEMORY_VS_NAIVE_CD8_TCELL_UP
	GSE32986_GMCSF_VS_GMCSF_AND_CURDLAN_LOWDOSE_STIM_DC_UP
	GSE32986_UNSTIM_VS_CURDLAN_LOWDOSE_STIM_DC_DN
	GSE33292_DN3_THYMOCYTE_VS_TCF1_KO_TCELL_LYMPHOMA_UP
	GSE33374_CD8_ALPHAALPHA_VS_ALPHABETA_CD161_HIGH_TCELL_DN
	GSE3337_4H_VS_16H_IFNG_IN_CD8POS_DC_UP
	GSE3337_CTRL_VS_16H_IFNG_IN_CD8POS_DC_DN
	GSE33424_CD161_HIGH_VS_INT_CD8_TCELL_DN
	GSE339_CD4POS_VS_CD8POS_DC_IN_CULTURE_DN
	GSE339_CD4POS_VS_CD8POS_DC_UP
	GSE339_CD8POS_VS_CD4CD8DN_DC_IN_CULTURE_UP
	GSE339_CD8POS_VS_CD4CD8DN_DC_UP
	GSE34006_UNTREATED_VS_A2AR_AGONIST_TREATED_TREG_DN
	GSE34156_TLR1_TLR2_LIGAND_VS_NOD2_AND_TLR1_TLR2_LIGAND_24H_TREATED_MONOCYTE_UP
	GSE34156_TLR1_TLR2_LIGAND_VS_NOD2_AND_TLR1_TLR2_LIGAND_6H_TREATED_MONOCYTE_DN
	GSE34205_RSV_VS_FLU_INF_INFANT_PBMC_DN
	GSE34217_MIR17_92_OVEREXPRESS_VS_WT_ACT_CD8_TCELL_UP
	GSE34515_CD16_NEG_VS_POS_MONOCYTE_DN
	GSE35685_CD34POS_CD38NEG_VS_CD34POS_CD10POS_BONE_MARROW_UP
	GSE36078_UNTREATED_VS_AD5_INF_MOUSE_LUNG_DC_DN
	GSE36078_WT_VS_IL1R_KO_LUNG_DC_AFTER_AD5_T425A_HEXON_INF_UP
	GSE360_CTRL_VS_L_DONOVANI_MAC_UP
	GSE360_CTRL_VS_T_GONDII_DC_UP
	GSE360_DC_VS_MAC_B_MALAYI_HIGH_DOSE_DN
	GSE360_DC_VS_MAC_B_MALAYI_LOW_DOSE_DN
	GSE360_DC_VS_MAC_DN
	GSE360_DC_VS_MAC_L_DONOVANI_DN
	GSE360_HIGH_DOSE_B_MALAYI_VS_M_TUBERCULOSIS_MAC_UP
	GSE360_LOW_DOSE_B_MALAYI_VS_M_TUBERCULOSIS_DC_DN
	GSE360_LOW_DOSE_B_MALAYI_VS_M_TUBERCULOSIS_DC_UP
	GSE360_L_DONOVANI_VS_B_MALAYI_LOW_DOSE_DC_DN
	GSE360_L_DONOVANI_VS_M_TUBERCULOSIS_MAC_DN
	GSE360_L_DONOVANI_VS_T_GONDII_MAC_DN
	GSE360_L_MAJOR_VS_B_MALAYI_HIGH_DOSE_MAC_DN
	GSE360_L_MAJOR_VS_B_MALAYI_LOW_DOSE_DC_DN
	GSE360_L_MAJOR_VS_B_MALAYI_LOW_DOSE_MAC_DN
	GSE360_T_GONDII_VS_B_MALAYI_HIGH_DOSE_DC_DN
	GSE360_T_GONDII_VS_B_MALAYI_HIGH_DOSE_MAC_DN
	GSE360_T_GONDII_VS_B_MALAYI_LOW_DOSE_DC_DN
	GSE360_T_GONDII_VS_B_MALAYI_LOW_DOSE_MAC_DN
	GSE36392_MAC_VS_NEUTROPHIL_IL25_TREATED_LUNG_DN
	GSE36392_TYPE_2_MYELOID_VS_EOSINOPHIL_IL25_TREATED_LUNG_UP
	GSE36392_TYPE_2_MYELOID_VS_NEUTROPHIL_IL25_TREATED_LUNG_DN
	GSE36476_CTRL_VS_TSST_ACT_16H_MEMORY_CD4_TCELL_OLD_DN
	GSE36476_CTRL_VS_TSST_ACT_16H_MEMORY_CD4_TCELL_YOUNG_DN
	GSE36826_NORMAL_VS_STAPH_AUREUS_INF_IL1R_KO_SKIN_UP
	GSE36826_WT_VS_IL1R_KO_SKIN_STAPH_AUREUS_INF_DN
	GSE36826_WT_VS_IL1R_KO_SKIN_STAPH_AUREUS_INF_UP
	GSE36891_UNSTIM_VS_PAM_TLR2_STIM_PERITONEAL_MACROPHAGE_DN
	GSE3691_IFN_PRODUCING_KILLER_DC_VS_CONVENTIONAL_DC_SPLEEN_UP
	GSE369_PRE_VS_POST_IL6_INJECTION_SOCS3_KO_LIVER_DN
	GSE369_PRE_VS_POST_IL6_INJECTION_SOCS3_KO_LIVER_UP
	GSE3720_UNSTIM_VS_PMA_STIM_VD1_GAMMADELTA_TCELL_UP
	GSE3720_UNSTIM_VS_PMA_STIM_VD2_GAMMADELTA_TCELL_UP
	GSE37301_MULTIPOTENT_PROGENITOR_VS_CD4_TCELL_DN
	GSE37301_MULTIPOTENT_PROGENITOR_VS_PRO_BCELL_UP
	GSE37301_PRO_BCELL_VS_RAG2_KO_NK_CELL_UP
	GSE37301_RAG2_KO_VS_RAG2_AND_ETS1_KO_NK_CELL_UP
	GSE37416_12H_VS_48H_F_TULARENSIS_LVS_NEUTROPHIL_DN
	GSE37533_PPARG1_FOXP3_VS_FOXP3_TRANSDUCED_CD4_TCELL_UP
	GSE37533_UNTREATED_VS_PIOGLIZATONE_TREATED_CD4_TCELL_PPARG1_AND_FOXP3_TRASDUCED_DN
	GSE37534_GW1929_VS_PIOGLITAZONE_TREATED_CD4_TCELL_PPARG1_FOXP3_TRANSDUCED_UP
	GSE37605_C57BL6_VS_NOD_FOXP3_FUSION_GFP_TREG_DN
	GSE37605_FOXP3_FUSION_GFP_VS_IRES_GFP_TREG_C57BL6_UP
	GSE37605_FOXP3_FUSION_GFP_VS_IRES_GFP_TREG_NOD_UP
	GSE37605_TREG_VS_TCONV_C57BL6_FOXP3_IRES_GFP_DN
	GSE38304_MYC_NEG_VS_POS_GC_BCELL_DN
	GSE38681_WT_VS_LYL1_KO_LYMPHOID_PRIMED_MULTIPOTENT_PROGENITOR_UP
	GSE39556_UNTREATED_VS_3H_POLYIC_INJ_MOUSE_CD8A_DC_DN
	GSE39820_CTRL_VS_TGFBETA3_IL6_CD4_TCELL_DN
	GSE3982_BCELL_VS_EFF_MEMORY_CD4_TCELL_UP
	GSE3982_CENT_MEMORY_CD4_TCELL_VS_NKCELL_DN
	GSE3982_CTRL_VS_LPS_48H_DC_DN
	GSE3982_CTRL_VS_LPS_48H_DC_UP
	GSE3982_DC_VS_BCELL_UP
	GSE3982_DC_VS_CENT_MEMORY_CD4_TCELL_UP
	GSE3982_DC_VS_EFF_MEMORY_CD4_TCELL_UP
	GSE3982_DC_VS_NEUTROPHIL_UP
	GSE3982_DC_VS_NKCELL_UP
	GSE3982_EOSINOPHIL_VS_CENT_MEMORY_CD4_TCELL_DN
	GSE3982_EOSINOPHIL_VS_DC_DN
	GSE3982_EOSINOPHIL_VS_EFF_MEMORY_CD4_TCELL_DN
	GSE3982_MAST_CELL_VS_CENT_MEMORY_CD4_TCELL_UP
	GSE3982_MAST_CELL_VS_DC_DN
	GSE3982_MAST_CELL_VS_DC_UP
	GSE3982_MAST_CELL_VS_MAC_DN
	GSE3982_MAST_CELL_VS_NKCELL_UP
	GSE3982_MEMORY_CD4_TCELL_VS_BCELL_DN
	GSE3982_NEUTROPHIL_VS_BCELL_DN
	GSE40273_EOS_KO_VS_WT_TREG_UP
	GSE40274_CTRL_VS_LEF1_TRANSDUCED_ACTIVATED_CD4_TCELL_UP
	GSE40274_CTRL_VS_XBP1_TRANSDUCED_ACTIVATED_CD4_TCELL_UP
	GSE40274_FOXP3_VS_FOXP3_AND_LEF1_TRANSDUCED_ACTIVATED_CD4_TCELL_UP
	GSE40274_IRF4_VS_FOXP3_AND_IRF4_TRANSDUCED_ACTIVATED_CD4_TCELL_UP
	GSE40666_STAT1_KO_VS_STAT4_KO_CD8_TCELL_WITH_IFNA_STIM_90MIN_DN
	GSE40666_UNTREATED_VS_IFNA_STIM_EFFECTOR_CD8_TCELL_90MIN_UP
	GSE41176_UNSTIM_VS_ANTI_IGM_STIM_BCELL_1H_DN
	GSE41176_UNSTIM_VS_ANTI_IGM_STIM_TAK1_KO_BCELL_24H_UP
	GSE41176_WT_VS_TAK1_KO_ANTI_IGM_STIM_BCELL_24H_UP
	GSE41176_WT_VS_TAK1_KO_ANTI_IGM_STIM_BCELL_3H_DN
	GSE41176_WT_VS_TAK1_KO_UNSTIM_BCELL_UP
	GSE41867_MEMORY_VS_EXHAUSTED_CD8_TCELL_DAY30_LCMV_DN
	GSE41978_ID2_KO_VS_ID2_KO_AND_BIM_KO_KLRG1_LOW_EFFECTOR_CD8_TCELL_DN
	GSE41978_KLRG1_HIGH_VS_LOW_EFFECTOR_CD8_TCELL_DN
	GSE42021_CD24HI_TREG_VS_CD24HI_TCONV_THYMUS_UP
	GSE42021_CD24HI_VS_CD24INT_TREG_THYMUS_UP
	GSE42021_CD24HI_VS_CD24LOW_TCONV_THYMUS_UP
	GSE42021_CD24LO_TREG_VS_CD24LO_TCONV_THYMUS_DN
	GSE42021_TCONV_PLN_VS_CD24HI_TCONV_THYMUS_DN
	GSE42021_TREG_PLN_VS_CD24INT_TREG_THYMUS_DN
	GSE42021_TREG_VS_TCONV_PLN_DN
	GSE42088_2H_VS_24H_LEISHMANIA_INF_DC_UP
	GSE42088_UNINF_VS_LEISHMANIA_INF_DC_2H_DN
	GSE42088_UNINF_VS_LEISHMANIA_INF_DC_4H_DN
	GSE42088_UNINF_VS_LEISHMANIA_INF_DC_4H_UP
	GSE42724_NAIVE_VS_B1_BCELL_DN
	GSE43260_BTLA_POS_VS_NEG_INTRATUMORAL_CD8_TCELL_UP
	GSE43863_NAIVE_VS_TFH_CD4_EFF_TCELL_D6_LCMV_UP
	GSE43863_NAIVE_VS_TH1_EFF_CD4_TCELL_D6_LCMV_UP
	GSE43955_10H_VS_30H_ACT_CD4_TCELL_UP
	GSE43955_10H_VS_30H_ACT_CD4_TCELL_WITH_TGFB_IL6_UP
	GSE43955_10H_VS_60H_ACT_CD4_TCELL_UP
	GSE43955_TH0_VS_TGFB_IL6_IL23_TH17_ACT_CD4_TCELL_60H_UP
	GSE43955_TH0_VS_TGFB_IL6_TH17_ACT_CD4_TCELL_42H_DN
	GSE43955_TH0_VS_TGFB_IL6_TH17_ACT_CD4_TCELL_42H_UP
	GSE44649_NAIVE_VS_ACTIVATED_CD8_TCELL_UP
	GSE44955_MCSF_VS_MCSF_AND_IL27_STIM_MACROPHAGE_DN
	GSE44955_MCSF_VS_MCSF_AND_IL27_STIM_MACROPHAGE_UP
	GSE45365_HEALTHY_VS_MCMV_INFECTION_CD8A_DC_UP
	GSE45365_NK_CELL_VS_CD8_TCELL_MCMV_INFECTION_DN
	GSE45365_WT_VS_IFNAR_KO_CD8A_DC_DN
	GSE45365_WT_VS_IFNAR_KO_CD8A_DC_UP
	GSE45382_UNTREATED_VS_TGFB_TREATED_MACROPHAGES_UP
	GSE45837_WT_VS_GFI1_KO_PDC_DN
	GSE46242_CTRL_VS_EGR2_DELETED_ANERGIC_TH1_CD4_TCELL_UP
	GSE46242_CTRL_VS_EGR2_DELETED_TH1_CD4_TCELL_UP
	GSE46606_IRF4HIGH_VS_WT_CD40L_IL2_IL5_DAY3_STIMULATED_BCELL_DN
	GSE46606_IRF4MID_VS_WT_CD40L_IL2_IL5_DAY3_STIMULATED_BCELL_DN
	GSE5099_CLASSICAL_M1_VS_ALTERNATIVE_M2_MACROPHAGE_UP
	GSE5099_DAY3_VS_DAY7_MCSF_TREATED_MACROPHAGE_UP
	GSE5099_UNSTIM_VS_MCSF_TREATED_MONOCYTE_DAY3_DN
	GSE5455_HEALTHY_VS_TUMOR_BEARING_MOUSE_SPLEEN_MONOCYTE_DN
	GSE5503_LIVER_DC_VS_PLN_DC_ACTIVATED_ALLOGENIC_TCELL_UP
	GSE5589_LPS_VS_LPS_AND_IL10_STIM_MACROPHAGE_45MIN_DN
	GSE5589_WT_VS_IL10_KO_LPS_AND_IL10_STIM_MACROPHAGE_45MIN_DN
	GSE5679_CTRL_VS_PPARG_LIGAND_ROSIGLITAZONE_AND_RARA_AGONIST_AM580_TREATED_DC_DN
	GSE5679_RARA_AGONIST_AM580_VS_AM580_AND_ROSIGLITAZONE_TREATED_DC_DN
	GSE5679_RARA_AGONIST_AM580_VS_AM580_AND_ROSIGLITAZONE_TREATED_DC_UP
	GSE6092_IFNG_VS_IFNG_AND_B_BURGDORFERI_INF_ENDOTHELIAL_CELL_DN
	GSE6259_DEC205_POS_DC_VS_CD8_TCELL_UP
	GSE6259_FLT3L_INDUCED_DEC205_POS_DC_VS_CD8_TCELL_UP
	GSE6269_E_COLI_VS_STAPH_AUREUS_INF_PBMC_DN
	GSE6269_FLU_VS_STAPH_AUREUS_INF_PBMC_DN
	GSE6269_HEALTHY_VS_FLU_INF_PBMC_UP
	GSE6269_HEALTHY_VS_STAPH_AUREUS_INF_PBMC_DN
	GSE6674_ANTI_IGM_VS_PL2_3_STIM_BCELL_UP
	GSE7218_UNSTIM_VS_ANTIGEN_STIM_THROUGH_IGG_BCELL_DN
	GSE7509_DC_VS_MONOCYTE_DN
	GSE7509_DC_VS_MONOCYTE_UP
	GSE7509_FCGRIIB_VS_TNFA_IL1B_IL6_PGE_STIM_DC_UP
	GSE7509_UNSTIM_VS_FCGRIIB_STIM_MONOCYTE_UP
	GSE7548_DAY7_VS_DAY28_PCC_IMMUNIZATION_CD4_TCELL_DN
	GSE7831_1H_VS_4H_CPG_STIM_PDC_UP
	GSE7831_UNSTIM_VS_INFLUENZA_STIM_PDC_4H_DN
	GSE8678_IL7R_LOW_VS_HIGH_EFF_CD8_TCELL_UP
	GSE8921_UNSTIM_VS_TLR1_2_STIM_MONOCYTE_24H_DN
	GSE9006_HEALTHY_VS_TYPE_2_DIABETES_PBMC_AT_DX_UP
	GSE9006_TYPE_1_DIABETES_AT_DX_VS_1MONTH_POST_DX_PBMC_UP
	GSE9006_TYPE_1_DIABETES_AT_DX_VS_4MONTH_POST_DX_PBMC_UP
	GSE9316_IL6_KO_VS_IFNG_KO_INVIVO_EXPANDED_CD4_TCELL_DN
	GSE9316_IL6_KO_VS_IFNG_KO_INVIVO_EXPANDED_CD4_TCELL_UP
	GSE9509_10MIN_VS_30MIN_LPS_STIM_IL10_KO_MACROPHAGE_UP
	GSE9650_EFFECTOR_VS_EXHAUSTED_CD8_TCELL_UP
	GSE9650_NAIVE_VS_EFF_CD8_TCELL_DN
	GSE9650_NAIVE_VS_MEMORY_CD8_TCELL_DN
	GSE9988_ANTI_TREM1_AND_LPS_VS_CTRL_TREATED_MONOCYTES_DN
	GSE9988_ANTI_TREM1_VS_ANTI_TREM1_AND_LPS_MONOCYTE_UP
	GSE9988_LPS_VS_CTRL_TREATED_MONOCYTE_DN
	HALLMARK_ADIPOGENESIS
	HALLMARK_FATTY_ACID_METABOLISM
	HALLMARK_GLYCOLYSIS
	HALLMARK_HEME_METABOLISM
	HALLMARK_HYPOXIA
	HALLMARK_OXIDATIVE_PHOSPHORYLATION
	HALLMARK_TNFA_SIGNALING_VIA_NFKB
	HARRIS_HYPOXIA
	HELLER_HDAC_TARGETS_UP
	HELLER_SILENCED_BY_METHYLATION_UP
	HIRSCH_CELLULAR_TRANSFORMATION_SIGNATURE_UP
	HOLLERN_EMT_BREAST_TUMOR_UP
	HOLLMANN_APOPTOSIS_VIA_CD40_DN
	HOLLMANN_APOPTOSIS_VIA_CD40_UP
	HOXA9_DN
	HSIAO_HOUSEKEEPING_GENES
	HSIAO_LIVER_SPECIFIC_GENES
	HUANG_GATA2_TARGETS_UP
	JIANG_HYPOXIA_NORMAL
	JISON_SICKLE_CELL_DISEASE_UP
	JOHNSTONE_PARVB_TARGETS_2_UP
	JOHNSTONE_PARVB_TARGETS_3_UP
	KAAB_HEART_ATRIUM_VS_VENTRICLE_DN
	KAECH_DAY8_EFF_VS_DAY15_EFF_CD8_TCELL_UP
	KAECH_NAIVE_VS_DAY15_EFF_CD8_TCELL_UP
	KAECH_NAIVE_VS_DAY8_EFF_CD8_TCELL_DN
	KAYO_AGING_MUSCLE_DN
	KAYO_CALORIE_RESTRICTION_MUSCLE_UP
	KEGG_ALZHEIMERS_DISEASE
	KEGG_LYSOSOME
	KEGG_OXIDATIVE_PHOSPHORYLATION
	KEGG_PARKINSONS_DISEASE
	KEGG_PEROXISOME
	KEGG_RIBOSOME
	KESHELAVA_MULTIPLE_DRUG_RESISTANCE
	KIM_ALL_DISORDERS_DURATION_CORR_DN
	KIM_ALL_DISORDERS_OLIGODENDROCYTE_NUMBER_CORR_UP
	KIM_BIPOLAR_DISORDER_OLIGODENDROCYTE_DENSITY_CORR_UP
	KIM_WT1_TARGETS_8HR_DN
	KINSEY_TARGETS_OF_EWSR1_FLII_FUSION_DN
	KOINUMA_TARGETS_OF_SMAD2_OR_SMAD3
	KRAS
	KRIEG_HYPOXIA_NOT_VIA_KDM3A
	KYNG_WERNER_SYNDROM_AND_NORMAL_AGING_DN
	LANDIS_ERBB2_BREAST_TUMORS_324_DN
	LEE_BMP2_TARGETS_UP
	LEI_MYB_TARGETS
	LIM_MAMMARY_STEM_CELL_DN
	LI_AMPLIFIED_IN_LUNG_CANCER
	LI_INDUCED_T_TO_NATURAL_KILLER_UP
	LOPEZ_MBD_TARGETS
	LU_EZH2_TARGETS_UP
	MARKEY_RB1_ACUTE_LOF_DN
	MARTINEZ_RB1_TARGETS_DN
	MARTINEZ_TP53_TARGETS_UP
	MARTORIATI_MDM4_TARGETS_FETAL_LIVER_UP
	MARTORIATI_MDM4_TARGETS_NEUROEPITHELIUM_UP
	MEK_UP
	MEL18_DN
	MILI_PSEUDOPODIA_CHEMOTAXIS_DN
	MILI_PSEUDOPODIA_HAPTOTAXIS_DN
	MISSIAGLIA_REGULATED_BY_METHYLATION_UP
	MODULE_1
	MODULE_114
	MODULE_151
	MODULE_152
	MODULE_18
	MODULE_212
	MODULE_24
	MODULE_3
	MODULE_33
	MODULE_43
	MODULE_45
	MODULE_5
	MODULE_52
	MODULE_55
	MODULE_62
	MODULE_83
	MODULE_93
	MOOTHA_HUMAN_MITODB_6_2002
	MOOTHA_MITOCHONDRIA
	MOOTHA_PGC
	MOOTHA_VOXPHOS
	MORF_ACTG1
	MORF_ANP32B
	MORF_AP2M1
	MORF_AP3D1
	MORF_ATOX1
	MORF_BAG5
	MORF_BECN1
	MORF_CCNI
	MORF_CSNK2B
	MORF_CTBP1
	MORF_DAP
	MORF_DAP3
	MORF_EI24
	MORF_EIF3S2
	MORF_EIF3S6
	MORF_EIF4A2
	MORF_ERH
	MORF_G22P1
	MORF_GNB1
	MORF_HDAC1
	MORF_JUND
	MORF_MAP2K2
	MORF_NME2
	MORF_NPM1
	MORF_PPP1CA
	MORF_PPP2R4
	MORF_PRDX3
	MORF_PRKAR1A
	MORF_PSMC1
	MORF_RAB1A
	MORF_RAB5A
	MORF_RAC1
	MORF_RAD23A
	MORF_RAN
	MORF_SART1
	MORF_TPT1
	MORF_UBE2I
	MULLIGHAN_MLL_SIGNATURE_1_UP
	MULLIGHAN_MLL_SIGNATURE_2_UP
	MULLIGHAN_NPM1_SIGNATURE_3_DN
	NAKAMURA_TUMOR_ZONE_PERIPHERAL_VS_CENTRAL_UP
	ONKEN_UVEAL_MELANOMA_DN
	OUELLET_OVARIAN_CANCER_INVASIVE_VS_LMP_UP
	PARENT_MTOR_SIGNALING_UP
	PECE_MAMMARY_STEM_CELL_UP
	PELLICCIOTTA_HDAC_IN_ANTIGEN_PRESENTATION_UP
	PETROVA_ENDOTHELIUM_LYMPHATIC_VS_BLOOD_DN
	PHONG_TNF_RESPONSE_NOT_VIA_P38
	PRC2_EZH2_UP
	PROVENZANI_METASTASIS_DN
	PROVENZANI_METASTASIS_UP
	QI_PLASMACYTOMA_DN
	RASHI_RESPONSE_TO_IONIZING_RADIATION_2
	RB_DN
	RB_P107_DN
	REACTOME_ACTIVATION_OF_THE_MRNA_UPON_BINDING_OF_THE_CAP_BINDING_COMPLEX_AND_EIFS_AND_SUBSEQUENT_BINDING_TO_43S
	REACTOME_ADAPTIVE_IMMUNE_SYSTEM
	REACTOME_ANTIGEN_PROCESSING_CROSS_PRESENTATION
	REACTOME_ASPARAGINE_N_LINKED_GLYCOSYLATION
	REACTOME_AXON_GUIDANCE
	REACTOME_COLLAGEN_FORMATION
	REACTOME_COPI_MEDIATED_ANTEROGRADE_TRANSPORT
	REACTOME_DEVELOPMENTAL_BIOLOGY
	REACTOME_DISEASE
	REACTOME_ER_TO_GOLGI_ANTEROGRADE_TRANSPORT
	REACTOME_EUKARYOTIC_TRANSLATION_INITIATION
	REACTOME_HEMOSTASIS
	REACTOME_INFECTIOUS_DISEASE
	REACTOME_INFLUENZA_INFECTION
	REACTOME_INNATE_IMMUNE_SYSTEM
	REACTOME_INTRA_GOLGI_AND_RETROGRADE_GOLGI_TO_ER_TRAFFIC
	REACTOME_METABOLISM_OF_AMINO_ACIDS_AND_DERIVATIVES
	REACTOME_METABOLISM_OF_CARBOHYDRATES
	REACTOME_MHC_CLASS_II_ANTIGEN_PRESENTATION
	REACTOME_NEUTROPHIL_DEGRANULATION
	REACTOME_NONSENSE_MEDIATED_DECAY_NMD
	REACTOME_NONSENSE_MEDIATED_DECAY_NMD_INDEPENDENT_OF_THE_EXON_JUNCTION_COMPLEX_EJC
	REACTOME_PEROXISOMAL_PROTEIN_IMPORT
	REACTOME_PLATELET_ACTIVATION_SIGNALING_AND_AGGREGATION
	REACTOME_POST_TRANSLATIONAL_PROTEIN_MODIFICATION
	REACTOME_PROTEIN_LOCALIZATION
	REACTOME_REGULATION_OF_EXPRESSION_OF_SLITS_AND_ROBOS
	REACTOME_RRNA_PROCESSING
	REACTOME_RRNA_PROCESSING_IN_THE_NUCLEUS_AND_CYTOSOL
	REACTOME_SCF_SKP2_MEDIATED_DEGRADATION_OF_P27_P21
	REACTOME_SELENOAMINO_ACID_METABOLISM
	REACTOME_SIGNALING_BY_INTERLEUKINS
	REACTOME_SIGNALING_BY_ROBO_RECEPTORS
	REACTOME_SPHINGOLIPID_METABOLISM
	REACTOME_SRP_DEPENDENT_COTRANSLATIONAL_PROTEIN_TARGETING_TO_MEMBRANE
	REACTOME_TOLL_LIKE_RECEPTOR_CASCADES
	REACTOME_TRANSLATION
	REACTOME_TRANSPORT_TO_THE_GOLGI_AND_SUBSEQUENT_MODIFICATION
	REACTOME_UCH_PROTEINASES
	REACTOME_UNFOLDED_PROTEIN_RESPONSE_UPR
	RHEIN_ALL_GLUCOCORTICOID_THERAPY_DN
	RICKMAN_METASTASIS_DN
	RICKMAN_TUMOR_DIFFERENTIATED_WELL_VS_POORLY_DN
	RIZKI_TUMOR_INVASIVENESS_3D_DN
	RODWELL_AGING_KIDNEY_UP
	ROZANOV_MMP14_TARGETS_UP
	RYTTCCTG_ETS2_B
	SANA_RESPONSE_TO_IFNG_DN
	SASSON_RESPONSE_TO_FORSKOLIN_DN
	SERVITJA_LIVER_HNF1A_TARGETS_UP
	SESTO_RESPONSE_TO_UV_C7
	SHAFFER_IRF4_TARGETS_IN_MYELOMA_VS_MATURE_B_LYMPHOCYTE
	SHETH_LIVER_CANCER_VS_TXNIP_LOSS_PAM1
	SMIRNOV_CIRCULATING_ENDOTHELIOCYTES_IN_CANCER_UP
	SMIRNOV_RESPONSE_TO_IR_6HR_UP
	SMITH_TERT_TARGETS_DN
	SPIELMAN_LYMPHOBLAST_EUROPEAN_VS_ASIAN_UP
	STEIN_ESRRA_TARGETS
	STEIN_ESRRA_TARGETS_UP
	SUNG_METASTASIS_STROMA_UP
	SWEET_LUNG_CANCER_KRAS_UP
	TAKAO_RESPONSE_TO_UVB_RADIATION_UP
	TARTE_PLASMA_CELL_VS_B_LYMPHOCYTE_UP
	TARTE_PLASMA_CELL_VS_PLASMABLAST_UP
	TGANNYRGCA_TCF11MAFG_01
	TIEN_INTESTINE_PROBIOTICS_24HR_DN
	TIEN_INTESTINE_PROBIOTICS_6HR_UP
	TONKS_TARGETS_OF_RUNX1_RUNX1T1_FUSION_ERYTHROCYTE_UP
	TSENG_IRS1_TARGETS_UP
	UDAYAKUMAR_MED1_TARGETS_DN
	V1_DN
	V1_UP
	VERHAAK_GLIOBLASTOMA_CLASSICAL
	WANG_ESOPHAGUS_CANCER_VS_NORMAL_DN
	WANG_ESOPHAGUS_CANCER_VS_NORMAL_UP
	WANG_HCP_PROSTATE_CANCER
	WANG_TUMOR_INVASIVENESS_UP
	WATANABE_RECTAL_CANCER_RADIOTHERAPY_RESPONSIVE_UP
	WEST_ADRENOCORTICAL_TUMOR_DN
	WINTER_HYPOXIA_METAGENE
	WINTER_HYPOXIA_UP
	WONG_MITOCHONDRIA_GENE_MODULE
	YAGI_AML_WITH_11Q23_REARRANGED
	YAGI_AML_WITH_INV_16_TRANSLOCATION
	YAO_TEMPORAL_RESPONSE_TO_PROGESTERONE_CLUSTER_12
	YAO_TEMPORAL_RESPONSE_TO_PROGESTERONE_CLUSTER_13
	YAO_TEMPORAL_RESPONSE_TO_PROGESTERONE_CLUSTER_16
	YAO_TEMPORAL_RESPONSE_TO_PROGESTERONE_CLUSTER_17
	ZHONG_SECRETOME_OF_LUNG_CANCER_AND_FIBROBLAST
	ZHONG_SECRETOME_OF_LUNG_CANCER_AND_MACROPHAGE

## Sheet: SOX11-KD mis-expressed in 4S 
SOX11-KD, mis-downregulated	SOX11-KD, mis-upregulated
MEISSNER_BRAIN_HCP_WITH_H3K4ME3_AND_H3K27ME3	REACTOME_TRANSLATION
BOQUEST_STEM_CELL_UP	MORF_NME2
GSE19888_CTRL_VS_TCELL_MEMBRANES_ACT_MAST_CELL_PRETREAT_A3R_INH_UP	MODULE_83
GO_EXTRACELLULAR_MATRIX	GO_RIBOSOMAL_SUBUNIT
REACTOME_EXTRACELLULAR_MATRIX_ORGANIZATION	MORF_AP2M1
SCHUETZ_BREAST_CANCER_DUCTAL_INVASIVE_UP	GO_MITOCHONDRIAL_PROTEIN_COMPLEX
NABA_CORE_MATRISOME	GO_STRUCTURAL_CONSTITUENT_OF_RIBOSOME
GSE19888_ADENOSINE_A3R_INH_VS_ACT_IN_MAST_CELL_DN	HSIAO_HOUSEKEEPING_GENES
GO_COLLAGEN_CONTAINING_EXTRACELLULAR_MATRIX	MORF_RAN
GSE8921_UNSTIM_0H_VS_TLR1_2_STIM_MONOCYTE_24H_UP	MODULE_151
GSE17721_LPS_VS_CPG_16H_BMDC_UP	GO_RIBOSOME
SHEN_SMARCA2_TARGETS_DN	MODULE_114
GSE22886_NAIVE_CD4_TCELL_VS_NEUTROPHIL_DN	MORF_DAP3
REACTOME_G_ALPHA_I_SIGNALLING_EVENTS	MODULE_152
CHANDRAN_METASTASIS_DN	REACTOME_EUKARYOTIC_TRANSLATION_INITIATION
GO_SULFUR_COMPOUND_BIOSYNTHETIC_PROCESS	GCM_CSNK2B
	GSE2405_0H_VS_9H_A_PHAGOCYTOPHILUM_STIM_NEUTROPHIL_DN
	GSE17974_CTRL_VS_ACT_IL4_AND_ANTI_IL12_24H_CD4_TCELL_DN
	MORF_PPP1CA
	MORF_ACTG1
	ACEVEDO_LIVER_TUMOR_VS_NORMAL_ADJACENT_TISSUE_UP
	GO_LARGE_RIBOSOMAL_SUBUNIT
	CHR17Q25
	KEGG_PARKINSONS_DISEASE
	WONG_EMBRYONIC_STEM_CELL_CORE
	MORF_NPM1
	GSE26030_TH1_VS_TH17_RESTIMULATED_DAY5_POST_POLARIZATION_UP
	LI_AMPLIFIED_IN_LUNG_CANCER
	REACTOME_RRNA_PROCESSING_IN_THE_NUCLEUS_AND_CYTOSOL
	GSE42724_NAIVE_VS_B1_BCELL_DN
	REACTOME_SRP_DEPENDENT_COTRANSLATIONAL_PROTEIN_TARGETING_TO_MEMBRANE
	MORF_RAD23B
	MORF_SKP1A
	MORF_UBE2I
	YAO_TEMPORAL_RESPONSE_TO_PROGESTERONE_CLUSTER_17
	GNF2_DAP3
	REACTOME_RRNA_PROCESSING
	MORF_SOD1
	REACTOME_ACTIVATION_OF_THE_MRNA_UPON_BINDING_OF_THE_CAP_BINDING_COMPLEX_AND_EIFS_AND_SUBSEQUENT_BINDING_TO_43S
	GO_TRANSLATIONAL_INITIATION
	MORF_PSMC1
	GSE2405_0H_VS_24H_A_PHAGOCYTOPHILUM_STIM_NEUTROPHIL_UP
	GO_OXIDATIVE_PHOSPHORYLATION
	GNF2_ST13
	GSE22886_UNSTIM_VS_IL15_STIM_NKCELL_DN
	GO_COTRANSLATIONAL_PROTEIN_TARGETING_TO_MEMBRANE
	PECE_MAMMARY_STEM_CELL_UP
	MODULE_54
	GNF2_FBL
	GNF2_EIF3S6
	DANG_MYC_TARGETS_UP
	MORF_ERH
	LASTOWSKA_NEUROBLASTOMA_COPY_NUMBER_UP
	GSE36476_CTRL_VS_TSST_ACT_72H_MEMORY_CD4_TCELL_YOUNG_DN
	MORF_PRKAR1A
	MORF_AP3D1
	CAIRO_HEPATOBLASTOMA_CLASSES_UP
	FOURNIER_ACINAR_DEVELOPMENT_LATE_2
	REACTOME_INFLUENZA_INFECTION
	REACTOME_NONSENSE_MEDIATED_DECAY_NMD_INDEPENDENT_OF_THE_EXON_JUNCTION_COMPLEX_EJC
	BERENJENO_TRANSFORMED_BY_RHOA_UP
	REACTOME_SELENOAMINO_ACID_METABOLISM
	GO_PEPTIDE_BIOSYNTHETIC_PROCESS
	GSE14415_ACT_VS_CTRL_NATURAL_TREG_UP
	GO_MITOCHONDRIAL_TRANSLATION
	GO_INNER_MITOCHONDRIAL_MEMBRANE_PROTEIN_COMPLEX
	GO_MITOCHONDRIAL_GENE_EXPRESSION
	GO_CYTOSOLIC_RIBOSOME
	GSE22443_IL2_VS_IL12_TREATED_ACT_CD8_TCELL_DN
	MORF_RAB1A
	MORF_RAD21
	GSE22886_CTRL_VS_LPS_24H_DC_UP
	MORF_PPP2CA
	KEGG_RIBOSOME
	GSE36476_CTRL_VS_TSST_ACT_40H_MEMORY_CD4_TCELL_YOUNG_DN
	MORF_TPT1
	GO_PROTEIN_LOCALIZATION_TO_ENDOPLASMIC_RETICULUM
	GO_ESTABLISHMENT_OF_PROTEIN_LOCALIZATION_TO_ENDOPLASMIC_RETICULUM
	GCM_NPM1
	GSE26156_DOUBLE_POSITIVE_VS_CD4_SINGLE_POSITIVE_THYMOCYTE_DN
	GSE15750_DAY6_VS_DAY10_EFF_CD8_TCELL_UP
	GSE10239_KLRG1INT_VS_KLRG1HIGH_EFF_CD8_TCELL_UP
	HALLMARK_DNA_REPAIR
	MORF_EIF3S2
	GSE22432_PDC_VS_TGFB1_TREATEDCOMMON_DC_PROGENITOR_UP
	BENPORATH_PROLIFERATION
	GSE12845_NAIVE_VS_PRE_GC_TONSIL_BCELL_DN
	NIKOLSKY_BREAST_CANCER_17Q21_Q25_AMPLICON
	MODULE_62
	GSE28726_ACT_CD4_TCELL_VS_ACT_VA24NEG_NKTCELL_UP
	GSE16385_IFNG_TNF_VS_IL4_STIM_MACROPHAGE_ROSIGLITAZONE_TREATED_DN
	GO_ORGANELLE_INNER_MEMBRANE
	MORF_RAC1
	GSE3982_EFF_MEMORY_CD4_TCELL_VS_TH2_DN
	MORF_CTBP1
	KAAB_FAILED_HEART_ATRIUM_DN
	GO_NUCLEAR_TRANSCRIBED_MRNA_CATABOLIC_PROCESS_NONSENSE_MEDIATED_DECAY
	GSE25085_FETAL_LIVER_VS_ADULT_BM_SP4_THYMIC_IMPLANT_DN
	GO_MITOCHONDRIAL_MATRIX
	BOYAULT_LIVER_CANCER_SUBCLASS_G3_UP
	REACTOME_NONSENSE_MEDIATED_DECAY_NMD
	GNF2_HDAC1
	GSE17721_LPS_VS_GARDIQUIMOD_2H_BMDC_DN
	KIM_BIPOLAR_DISORDER_OLIGODENDROCYTE_DENSITY_CORR_UP
	GSE24634_TREG_VS_TCONV_POST_DAY7_IL4_CONVERSION_UP
	GO_VIRAL_GENE_EXPRESSION
	GSE3982_NKCELL_VS_TH1_DN
	WANG_TUMOR_INVASIVENESS_UP
	MORF_CSNK2B
	GSE40274_CTRL_VS_FOXP3_AND_SATB1_TRANSDUCED_ACTIVATED_CD4_TCELL_UP
	HOFFMANN_LARGE_TO_SMALL_PRE_BII_LYMPHOCYTE_UP
	GSE37605_TREG_VS_TCONV_C57BL6_FOXP3_IRES_GFP_DN
	GSE39556_CD8A_DC_VS_NK_CELL_MOUSE_3H_POST_POLYIC_INJ_UP
	GSE15930_NAIVE_VS_72H_IN_VITRO_STIM_IFNAB_CD8_TCELL_UP
	GSE7509_UNSTIM_VS_FCGRIIB_STIM_MONOCYTE_UP
	GO_RIBOSOME_BIOGENESIS
	CASORELLI_ACUTE_PROMYELOCYTIC_LEUKEMIA_DN
	GO_RNA_CATABOLIC_PROCESS
	REACTOME_THE_CITRIC_ACID_TCA_CYCLE_AND_RESPIRATORY_ELECTRON_TRANSPORT
	GSE22886_DAY1_VS_DAY7_MONOCYTE_IN_CULTURE_DN
	GSE17974_0H_VS_12H_IN_VITRO_ACT_CD4_TCELL_DN
	GSE17974_CTRL_VS_ACT_IL4_AND_ANTI_IL12_48H_CD4_TCELL_DN
	GSE3982_MEMORY_CD4_TCELL_VS_TH2_DN
	GO_RNA_PHOSPHODIESTER_BOND_HYDROLYSIS
	GSE17721_0.5H_VS_8H_CPG_BMDC_UP
	CHR11P15
	GSE28726_NAIVE_VS_ACTIVATED_VA24NEG_NKTCELL_UP
	GO_RIBONUCLEOPROTEIN_COMPLEX
	GOLDRATH_NAIVE_VS_EFF_CD8_TCELL_DN
	MORF_HDAC1
	GSE36476_CTRL_VS_TSST_ACT_40H_MEMORY_CD4_TCELL_OLD_DN
	YAO_TEMPORAL_RESPONSE_TO_PROGESTERONE_CLUSTER_13
	GSE40666_STAT1_KO_VS_STAT4_KO_CD8_TCELL_UP
	GNF2_DENR
	GO_MITOCHONDRIAL_MEMBRANE_PART
	GSE3982_CENT_MEMORY_CD4_TCELL_VS_TH1_DN
	GO_MITOCHONDRIAL_RESPIRATORY_CHAIN_COMPLEX_ASSEMBLY
	PAX4_01
	BORCZUK_MALIGNANT_MESOTHELIOMA_UP
	GSE36826_WT_VS_IL1R_KO_SKIN_DN
	GO_AMIDE_BIOSYNTHETIC_PROCESS
	GSE33292_WT_VS_TCF1_KO_DN3_THYMOCYTE_DN
	HORIUCHI_WTAP_TARGETS_DN
	GSE28726_ACT_CD4_TCELL_VS_ACT_NKTCELL_UP
	MORF_DEK
	GSE17721_LPS_VS_POLYIC_24H_BMDC_UP
	GSE3982_NEUTROPHIL_VS_NKCELL_DN
	GSE36826_WT_VS_IL1R_KO_SKIN_STAPH_AUREUS_INF_UP
	GSE22886_NEUTROPHIL_VS_MONOCYTE_DN
	GSE21360_SECONDARY_VS_QUATERNARY_MEMORY_CD8_TCELL_DN
	GRADE_COLON_AND_RECTAL_CANCER_UP
	GSE9316_CD4_TCELL_BALBC_VS_TH17_ENRI_CD4_TCELL_SKG_PMA_IONO_STIM_FR4NEG_UP
	MORF_MAP2K2
	KEGG_ALZHEIMERS_DISEASE
	GO_SPLICEOSOMAL_COMPLEX
	GO_RESPIRASOME
	GOLDRATH_ANTIGEN_RESPONSE
	GSE1460_NAIVE_CD4_TCELL_ADULT_BLOOD_VS_THYMIC_STROMAL_CELL_DN
	LINDGREN_BLADDER_CANCER_CLUSTER_3_UP
	GSE17721_0.5H_VS_4H_GARDIQUIMOD_BMDC_UP
	GSE34156_UNTREATED_VS_6H_TLR1_TLR2_LIGAND_TREATED_MONOCYTE_DN
	GSE14000_UNSTIM_VS_4H_LPS_DC_UP
	GSE17721_PAM3CSK4_VS_GADIQUIMOD_8H_BMDC_UP
	GSE17721_PAM3CSK4_VS_CPG_8H_BMDC_UP
	GSE24634_TEFF_VS_TCONV_DAY7_IN_CULTURE_UP
	MORF_ANP32B
	GSE43863_TH1_VS_LY6C_LOW_CXCR5NEG_EFFECTOR_CD4_TCELL_UP
	MORF_RAD23A
	MORF_EIF4A2
	GSE14415_TCONV_VS_FOXP3_KO_INDUCED_TREG_DN
	GSE41867_LCMV_ARMSTRONG_VS_CLONE13_DAY6_EFFECTOR_CD8_TCELL_DN
	GSE2770_IL12_AND_TGFB_ACT_VS_ACT_CD4_TCELL_2H_UP
	GO_PROTEIN_TARGETING_TO_MEMBRANE
	GSE3720_UNSTIM_VS_PMA_STIM_VD2_GAMMADELTA_TCELL_DN
	REACTOME_REGULATION_OF_EXPRESSION_OF_SLITS_AND_ROBOS
	GO_CELLULAR_AMIDE_METABOLIC_PROCESS
	TEL2_Q6
	GSE42021_CD24LO_TREG_VS_CD24LO_TCONV_THYMUS_DN
	GO_CYTOPLASMIC_TRANSLATION
	REACTOME_METABOLISM_OF_RNA
	MITSIADES_RESPONSE_TO_APLIDIN_DN
	GO_NUCLEAR_TRANSCRIBED_MRNA_CATABOLIC_PROCESS
	GSE46242_TH1_VS_ANERGIC_TH1_CD4_TCELL_UP
	GSE8921_UNSTIM_0H_VS_TLR1_2_STIM_MONOCYTE_12H_UP
	GSE23568_CTRL_VS_ID3_TRANSDUCED_CD8_TCELL_DN
	GSE9601_UNTREATED_VS_PI3K_INHIBITOR_TREATED_HCMV_INF_MONOCYTE_UP
	BASAKI_YBX1_TARGETS_UP
	GSE46606_IRF4HIGH_VS_IRF4MID_CD40L_IL2_IL5_DAY3_STIMULATED_BCELL_UP
	GSE10856_CTRL_VS_TNFRSF6B_IN_MACROPHAGE_DN
	GSE15330_HSC_VS_GRANULOCYTE_MONOCYTE_PROGENITOR_IKAROS_KO_DN
	GSE18791_CTRL_VS_NEWCASTLE_VIRUS_DC_8H_UP
	BIDUS_METASTASIS_UP
	GSE9988_LPS_VS_CTRL_TREATED_MONOCYTE_DN
	GO_REGULATION_OF_MRNA_CATABOLIC_PROCESS
	GABP_B
	GSE411_WT_VS_SOCS3_KO_MACROPHAGE_UP
	GO_RRNA_METABOLIC_PROCESS
	GSE42088_UNINF_VS_LEISHMANIA_INF_DC_4H_DN
	GO_REGULATION_OF_CHROMOSOME_SEGREGATION
	HALLMARK_E2F_TARGETS
	GSE21360_SECONDARY_VS_TERTIARY_MEMORY_CD8_TCELL_UP
	HALLMARK_GLYCOLYSIS
	GO_POSITIVE_REGULATION_OF_VIRAL_PROCESS
	GSE3982_MEMORY_CD4_TCELL_VS_TH1_DN
	DANG_BOUND_BY_MYC
	GSE26030_TH1_VS_TH17_RESTIMULATED_DAY15_POST_POLARIZATION_DN
	SHEPARD_CRUSH_AND_BURN_MUTANT_UP
	REACTOME_MITOTIC_METAPHASE_AND_ANAPHASE
	GO_RIBONUCLEOPROTEIN_COMPLEX_BIOGENESIS
	GSE17721_LPS_VS_GARDIQUIMOD_1H_BMDC_DN
	GSE17721_LPS_VS_PAM3CSK4_24H_BMDC_UP
	GSE41978_ID2_KO_VS_ID2_KO_AND_BIM_KO_KLRG1_LOW_EFFECTOR_CD8_TCELL_DN
	GSE18893_TCONV_VS_TREG_24H_TNF_STIM_UP
	GSE9988_LOW_LPS_VS_VEHICLE_TREATED_MONOCYTE_DN
	GO_MITOCHONDRIAL_ENVELOPE
	MORF_RPA2
	GSE5589_UNSTIM_VS_45MIN_LPS_STIM_MACROPHAGE_DN
	GO_CYTOSOLIC_PART
	REACTOME_INFECTIOUS_DISEASE
	GSE13547_CTRL_VS_ANTI_IGM_STIM_BCELL_12H_UP
	CHUNG_BLISTER_CYTOTOXICITY_UP
	GSE36476_CTRL_VS_TSST_ACT_16H_MEMORY_CD4_TCELL_OLD_DN
	FISCHER_G2_M_CELL_CYCLE
	GSE15330_MEGAKARYOCYTE_ERYTHROID_VS_GRANULOCYTE_MONOCYTE_PROGENITOR_IKAROS_KO_UP
	GSE33424_CD161_HIGH_VS_INT_CD8_TCELL_DN
	REN_ALVEOLAR_RHABDOMYOSARCOMA_DN
	REACTOME_RESPIRATORY_ELECTRON_TRANSPORT_ATP_SYNTHESIS_BY_CHEMIOSMOTIC_COUPLING_AND_HEAT_PRODUCTION_BY_UNCOUPLING_PROTEINS
	MOOTHA_PGC
	GSE33162_UNTREATED_VS_4H_LPS_STIM_HDAC3_KO_MACROPHAGE_DN
	MOOTHA_HUMAN_MITODB_6_2002
	GO_TELOMERE_ORGANIZATION
	MOOTHA_VOXPHOS
	GSE17721_0.5H_VS_24H_GARDIQUIMOD_BMDC_UP
	GRAESSMANN_RESPONSE_TO_MC_AND_DOXORUBICIN_DN
	GCM_CBFB
	STARK_PREFRONTAL_CORTEX_22Q11_DELETION_DN
	MORF_CCNI
	GSE22886_NAIVE_CD4_TCELL_VS_48H_ACT_TH1_DN
	GSE32255_WT_VS_JMJD2D_KNOCKDOWN_4H_LPS_STIM_DC_DN
	HALLMARK_OXIDATIVE_PHOSPHORYLATION
	BLUM_RESPONSE_TO_SALIRASIB_UP
	GSE3039_CD4_TCELL_VS_ALPHAALPHA_CD8_TCELL_DN
	GSE24634_IL4_VS_CTRL_TREATED_NAIVE_CD4_TCELL_DAY7_UP
	GSE12366_GC_BCELL_VS_PLASMA_CELL_UP
	MODULE_32
	GSE3039_ALPHAALPHA_VS_ALPHABETA_CD8_TCELL_UP
	MORF_BUB3
	GO_TRANSLATIONAL_ELONGATION
	GSE41867_NAIVE_VS_DAY8_LCMV_EFFECTOR_CD8_TCELL_UP
	DING_LUNG_CANCER_EXPRESSION_BY_COPY_NUMBER
	PROVENZANI_METASTASIS_UP
	RHEIN_ALL_GLUCOCORTICOID_THERAPY_DN
	GSE3920_UNTREATED_VS_IFNA_TREATED_FIBROBLAST_DN
	GSE27786_LIN_NEG_VS_NKTCELL_UP
	GSE17721_CTRL_VS_GARDIQUIMOD_8H_BMDC_DN
	GSE1925_3H_VS_24H_IFNG_STIM_IFNG_PRIMED_MACROPHAGE_DN
	GSE28726_NAIVE_VS_ACTIVATED_CD4_TCELL_DN
	GSE7568_IL4_VS_IL4_AND_TGFB_TREATED_MACROPHAGE_24H_DN
	GSE2770_IL12_VS_IL4_TREATED_ACT_CD4_TCELL_48H_UP
	GSE43863_NAIVE_VS_MEMORY_LY6C_INT_CXCR5POS_CD4_TCELL_D150_LCMV_DN
	SHEDDEN_LUNG_CANCER_POOR_SURVIVAL_A6
	GSE41867_DAY6_VS_DAY8_LCMV_ARMSTRONG_EFFECTOR_CD8_TCELL_DN
	GENTILE_UV_HIGH_DOSE_DN
	GSE41978_KLRG1_HIGH_VS_LOW_EFFECTOR_CD8_TCELL_DN
	KEGG_OXIDATIVE_PHOSPHORYLATION
	GSE17721_LPS_VS_CPG_4H_BMDC_DN
	GSE17974_1.5H_VS_72H_IL4_AND_ANTI_IL12_ACT_CD4_TCELL_DN
	GSE3982_BCELL_VS_TH1_DN
	GSE21063_3H_VS_16H_ANTI_IGM_STIM_NFATC1_KOBCELL_UP
	GSE2405_HEAT_KILLED_VS_LIVE_A_PHAGOCYTOPHILUM_STIM_NEUTROPHIL_9H_UP
	GSE5589_WT_VS_IL6_KO_LPS_AND_IL10_STIM_MACROPHAGE_45MIN_UP
	GSE1460_CORD_VS_ADULT_BLOOD_NAIVE_CD4_TCELL_DN
	WEST_ADRENOCORTICAL_TUMOR_UP
	GSE22886_DAY0_VS_DAY7_MONOCYTE_IN_CULTURE_DN
	MORF_ACP1
	SPIELMAN_LYMPHOBLAST_EUROPEAN_VS_ASIAN_UP
	MODULE_93
	GSE20198_UNTREATED_VS_IFNA_TREATED_ACT_CD4_TCELL_DN
	GSE21927_SPLEEN_C57BL6_VS_EL4_TUMOR_BALBC_MONOCYTES_DN
	GSE18791_CTRL_VS_NEWCASTLE_VIRUS_DC_6H_UP
	GSE14000_UNSTIM_VS_16H_LPS_DC_UP
	GSE28726_NAIVE_CD4_TCELL_VS_NAIVE_VA24NEG_NKTCELL_UP
	MODULE_256
	PUJANA_CHEK2_PCC_NETWORK
	GSE36826_NORMAL_VS_STAPH_AUREUS_INF_SKIN_UP
	GSE20727_CTRL_VS_ROS_INHIBITOR_TREATED_DC_UP
	BENPORATH_MYC_MAX_TARGETS
	GSE3982_NEUTROPHIL_VS_BASOPHIL_DN
	GSE17721_0.5H_VS_4H_CPG_BMDC_UP
	GCM_NF2
	GCM_APEX1
	GSE17721_CTRL_VS_GARDIQUIMOD_0.5H_BMDC_UP
	GO_NEGATIVE_REGULATION_OF_CHROMOSOME_ORGANIZATION
