# Supplementary material for: Kalirin-RAC controls nucleokinetic migration in ADRN-type neuroblastoma
Source: Life Sci Alliance. 2021 Mar 3;4(5):e201900332. doi: 10.26508/lsa.201900332 (PMC8017594; doi:10.26508/lsa.201900332)
Supplement: Supplementary file 11 [file LSA-2019-00332_Table_S4_Table_15.xls]

## Sheet: ENCORI_ZNF702P_binding_miRNAs
#Zhou KR, Liu S, Cai L, Bin L, et al. ENCORI: The Encyclopedia of RNA Interactomes.
#2.Li JH, et al.starBase v2.0: decoding miRNA-ceRNA, miRNA-ncRNA and protein-RNA interaction networks from large-scale CLIP-Seq data , Nucleic Acids Res. 2014 Jan;42:D92-7.
miRNAid	miRNAname	geneID	geneName	geneType	chromosome	start	end	strand	clipExpNum	degraExpNum	RBP	merClass	miRseq	align	targetSeq	pancancerNum
MIMAT0015085	hsa-miR-3200-3p	ENSG00000242779	ZNF702P	transcribed_processed_pseudogene	chr19	53472417	53472438	-	1	1	AGO1-4	7mer-m8	gucuggACUCAUCGCGUUCCAc	||| |: |||||||	augugaUGAUUGUGGCAAGGUc	2
MIMAT0004593	hsa-miR-130a-5p	ENSG00000242779	ZNF702P	transcribed_processed_pseudogene	chr19	53472432	53472451	-	1	0	AGO1-4	7mer-m8	cgUCUGUCAUCGUGUUACACUu	| || || || |||||||	agAAACCUUA-CA-AAUGUGAu	3
MIMAT0000078	hsa-miR-23a-3p	ENSG00000242779	ZNF702P	transcribed_processed_pseudogene	chr19	53472432	53472452	-	1	0	AGO1-4	7mer-m8	ccUUUAGGGACCGUUACACUa	:|| ||:| |||||||	gaGAAACCUUACAAAUGUGAu	5
MIMAT0000418	hsa-miR-23b-3p	ENSG00000242779	ZNF702P	transcribed_processed_pseudogene	chr19	53472432	53472452	-	1	0	AGO1-4	7mer-m8	ccaUUAGGGACCGUUACACUa	|| ||:| |||||||	gagAAACCUUACAAAUGUGAu	4
MIMAT0018000	hsa-miR-23c	ENSG00000242779	ZNF702P	transcribed_processed_pseudogene	chr19	53472432	53472453	-	1	0	AGO1-4	7mer-m8	cccaUUAGUGACCGUUACACUa	|| | :| |||||||	agagAAACCUUACAAAUGUGAu	2
MIMAT0015085	hsa-miR-3200-3p	ENSG00000242779	ZNF702P	transcribed_processed_pseudogene	chr19	53472921	53472942	-	3	0	AGO1-4	7mer-m8	gucuggACUCAUCGCGUUCCAc	||| |: |||||||	guguaaUGAAUGUGGCAAGGUu	2
MIMAT0016894	hsa-miR-4262	ENSG00000242779	ZNF702P	transcribed_processed_pseudogene	chr19	53472929	53472945	-	3	0	AGO1-4	7mer-m8	gucCAUCAGACUUACAg	||: |||||||	caaGUGUAAUGAAUGUg	0
MIMAT0000258	hsa-miR-181c-5p	ENSG00000242779	ZNF702P	transcribed_processed_pseudogene	chr19	53472929	53472950	-	3	0	AGO1-4	7mer-m8	ugAGUGGCUGUCCAACUUACAa	|:|| ::: |||||||	ccUUACAAGUGUAAUGAAUGUg	4
MIMAT0000257	hsa-miR-181b-5p	ENSG00000242779	ZNF702P	transcribed_processed_pseudogene	chr19	53472929	53472951	-	3	0	AGO1-4	7mer-m8	ugggugGCUGUCGUUACUUACAa	| | |:|||||||||	accuuaCAAGUGUAAUGAAUGUg	4
MIMAT0000256	hsa-miR-181a-5p	ENSG00000242779	ZNF702P	transcribed_processed_pseudogene	chr19	53472929	53472954	-	3	0	AGO1-4	7mer-m8	ugaguGGCUG-UCGCA--ACUUACAa	|: || ||:|| |||||||	gaaacCUUACAAGUGUAAUGAAUGUg	7
MIMAT0002821	hsa-miR-181d-5p	ENSG00000242779	ZNF702P	transcribed_processed_pseudogene	chr19	53472929	53472954	-	3	0	AGO1-4	7mer-m8	uggguGGCUGUU---GUUACUUACAa	|: |||| :|||||||||	gaaacCUUACAAGUGUAAUGAAUGUg	3
MIMAT0019917	hsa-miR-4766-5p	ENSG00000242779	ZNF702P	transcribed_processed_pseudogene	chr19	53473167	53473187	-	1	0	AGO1-4	8mer	uugugguugacgaGAAAGUCu	|||||||	guuugugacaaggCUUUCAGa	3
MIMAT0002810	hsa-miR-202-5p	ENSG00000242779	ZNF702P	transcribed_processed_pseudogene	chr19	53473222	53473243	-	1	0	AGO1-4	7mer-m8	guuucuucaUAUACGUAUCCUu	| | |||||||	cacaccuugAAAGACAUAGGAg	1
MIMAT0019908	hsa-miR-4761-5p	ENSG00000242779	ZNF702P	transcribed_processed_pseudogene	chr19	53473234	53473253	-	2	0	AGO1-4	8mer	ccAGUCCGUACGUGUGGAACa	|| | :| |||||||||	agUC-GCUAAUCACACCUUGa	2
MIMAT0000418	hsa-miR-23b-3p	ENSG00000242779	ZNF702P	transcribed_processed_pseudogene	chr19	53473263	53473283	-	2	0	AGO1-4	7mer-m8	ccauuagggaccgUUACACUa	|||||||	uacaaaugugaagAAUGUGAc	4
MIMAT0004593	hsa-miR-130a-5p	ENSG00000242779	ZNF702P	transcribed_processed_pseudogene	chr19	53473263	53473283	-	2	0	AGO1-4	7mer-m8	cgucuguCAUCGUGUUACACUu	|| | | |||||||	uacaaauGU-GAAGAAUGUGAc	3
MIMAT0018000	hsa-miR-23c	ENSG00000242779	ZNF702P	transcribed_processed_pseudogene	chr19	53473263	53473284	-	2	0	AGO1-4	7mer-m8	cccauuagugaccgUUACACUa	|||||||	uuacaaaugugaagAAUGUGAc	2
MIMAT0004593	hsa-miR-130a-5p	ENSG00000242779	ZNF702P	transcribed_processed_pseudogene	chr19	53473272	53473291	-	2	0	AGO1-4	8mer	cgUCUGUCAUCGUGUUACACUu	| || || || |||||||	agAAACCUUA-CA-AAUGUGAa	3
MIMAT0000078	hsa-miR-23a-3p	ENSG00000242779	ZNF702P	transcribed_processed_pseudogene	chr19	53473272	53473292	-	2	0	AGO1-4	8mer	ccUUUAGGGACCGUUACACUa	:|| ||:| |||||||	gaGAAACCUUACAAAUGUGAa	5
MIMAT0000418	hsa-miR-23b-3p	ENSG00000242779	ZNF702P	transcribed_processed_pseudogene	chr19	53473272	53473292	-	2	0	AGO1-4	8mer	ccaUUAGGGACCGUUACACUa	|| ||:| |||||||	gagAAACCUUACAAAUGUGAa	4
MIMAT0018000	hsa-miR-23c	ENSG00000242779	ZNF702P	transcribed_processed_pseudogene	chr19	53473272	53473293	-	2	0	AGO1-4	8mer	cccaUUAGUGACCGUUACACUa	|| | :| |||||||	agagAAACCUUACAAAUGUGAa	2
Table S4. Combined analyses of differentially expressed genes from RAC1- and kalirin-GEF1-inhibited IMR-32. miRNA-ZNF702P interaction data (Li et al, 2014) shows the binding of several miRNA species, including miR-181 family. Gene set enrichment analysis reveals enrichment of targets of several miRNAs and the motif “AACTTT_UNKNOWN” in 3′-UTR-ARE- and intronic-ARE-containing subsets from the profi…

## Sheet: ARE_genes_(Bakheet_et_al_,_2018
kalirin-GEF1 inhibitor # 1
NAME OF GENE SET	GENE SET SIZE	Enrichment Score (ES)	Normalized Enrichment Score (NES)	Nominal p-value	FDR-adjusted p-value (q-value)
3'UTRARE (Bakheet et al., 2018)	228	0.293865	4.48495	0	0
INTRONICARE (Bakheet et al., 2018)	587	0.161024	3.04118	0	0
kalirin-GEF1 inhibitor # 2
NAME OF GENE SET	GENE SET SIZE	Enrichment Score (ES)	Normalized Enrichment Score (NES)	Nominal p-value	FDR-adjusted p-value (q-value)
3'UTRARE	129	0.306453	3.40003	0	0
INTRONICARE	274	0.20507	2.41697	0	0
RAC1 inhibitor
NAME OF GENE SET	GENE SET SIZE	Enrichment Score (ES)	Normalized Enrichment Score (NES)	Nominal p-value	FDR-adjusted p-value (q-value)
3'UTRARE	189	0.094715	1.38347	0.120408	0.121172

## Sheet: miRNA_targets_in_ARE+_subsets
kalirin-GEF1 inhibitor#1: subsetted for intronic-ARE-positive genes		kalirin-GEF1 inhibitor#1: subsetted for 3'-UTR-ARE-positive genes	kalirin-GEF1 inhibitor#2: subsetted for intronic-ARE-positive genes
MSigDB (q-values < 0,05)	MIR (microRNA targets) (sorted, q-values < 0,05)	MIR (sorted, q-values < 0,05)	MIR (sorted, q-values < 0,05)	TYPE OF ENRICHMENT
AACTTT_UNKNOWN	MIR12136	MIR493_5P	MIR493_5P	pos
AATGTGA_MIR23A_MIR23B	MIR153_5P	MIR12136	MIR12136	pos
ACTAYRNNNCCCR_UNKNOWN	MIR335_3P	MIR4698	MIR4698	pos
ACTGTGA_MIR27A_MIR27B	MIR570_3P	MIR3658	MIR3658	pos
AGCACTT_MIR93_MIR302A_MIR302B_MIR302C_MIR302D_MIR372_MIR373_MIR520E_MIR520A_MIR526B_MIR520B_MIR520C_MIR520D	MIR607	MIR338_5P	MIR338_5P	pos
ATGTACA_MIR493	MIR3671	MIR335_3P	MIR335_3P	pos
BAELDE_DIABETIC_NEPHROPATHY_DN	MIR3662	MIR374A_5P	MIR374A_5P	pos
BASAKI_YBX1_TARGETS_DN	MIR5688	MIR340_5P	MIR340_5P	pos
BENPORATH_EED_TARGETS	MIR4482_3P	MIR186_5P	MIR186_5P	pos
BENPORATH_NANOG_TARGETS	MIR302C_5P	MIR302C_5P	MIR302C_5P	pos
BENPORATH_SUZ12_TARGETS	MIR302E	MIR656_3P	MIR656_3P	pos
BIDUS_METASTASIS_UP	MIR520D_5P	MIR30A_5P	MIR30A_5P	pos
BONOME_OVARIAN_CANCER_SURVIVAL_SUBOPTIMAL_DEBULKING	MIR338_5P	MIR153_5P	MIR153_5P	pos
BRUINS_UVC_RESPONSE_VIA_TP53_GROUP_A	MIR524_5P	MIR4796_3P	MIR4796_3P	pos
BUYTAERT_PHOTODYNAMIC_THERAPY_STRESS_UP	MIR340_5P	MIR30D_5P	MIR30D_5P	pos
CAGGTA_AREB6_01	MIR6504_3P	MIR6504_3P	MIR6504_3P	pos
CAGTATT_MIR200B_MIR200C_MIR429	MIR181A_5P_MIR181B_5P	MIR30E_5P	MIR30E_5P	pos
CAGTGTT_MIR141_MIR200A	MIR181D_5P	MIR607	MIR607	pos
CATGTAA_MIR496	MIR4328	MIR570_3P	MIR570_3P	pos
CDPCR3HD_01	MIR548AT_5P	MIR466	MIR466	pos
CEBP_01	MIR1323	MIR30B_5P_MIR30C_5P	MIR30B_5P_MIR30C_5P	pos
CREB_Q2_01	MIR4262	MIR4803	MIR4803	pos
CREIGHTON_ENDOCRINE_THERAPY_RESISTANCE_3	MIR944	MIR5582_3P	MIR5582_3P	pos
CTTTAAR_UNKNOWN	MIR7_2_3P	MIR374B_5P	MIR374B_5P	pos
CTTTGA_LEF1_Q2	MIR181C_5P	MIR10399_5P	MIR10399_5P	pos
CTTTGCA_MIR527	MIR4668_3P	MIR4262	MIR4262	pos
CTTTGTA_MIR524	MIR8063	MIR519C_3P	MIR519C_3P	pos
CUI_TCF21_TARGETS_2_DN	MIR3658	MIR3121_3P	MIR3121_3P	pos
DACOSTA_UV_RESPONSE_VIA_ERCC3_COMMON_DN	MIR10399_5P	MIR7856_5P	MIR7856_5P	pos
DACOSTA_UV_RESPONSE_VIA_ERCC3_DN	MIR520A_3P	LET_7G_3P	LET_7G_3P	pos
DAVICIONI_TARGETS_OF_PAX_FOXO1_FUSIONS_UP	MIR372_3P	LET_7C_3P	LET_7C_3P	pos
DEBIASI_APOPTOSIS_BY_REOVIRUS_INFECTION_UP	MIR186_5P	MIR1250_3P	MIR1250_3P	pos
DUTERTRE_ESTRADIOL_RESPONSE_24HR_DN	MIR520D_3P	MIR559	MIR559	pos
E2F1_Q3_01	MIR20A_5P	MIR4666A_3P	MIR4666A_3P	pos
ER_Q6_02	MIR548O_3P	LET_7A_2_3P	LET_7A_2_3P	pos
FOXO1_01	MIR5582_3P	MIR548AT_5P	MIR548AT_5P	pos
FOXO1_02	MIR656_3P	MIR1277_5P	MIR1277_5P	pos
FREAC2_01	MIR374A_5P	MIR548AR_5P	MIR548AR_5P	pos
GABRIELY_MIR21_TARGETS	MIR493_5P	MIR410_3P	MIR410_3P	pos
GATA1_02	MIR106B_5P	MIR205_3P	MIR205_3P	pos
GAUSSMANN_MLL_AF4_FUSION_TARGETS_C_UP	MIR519C_3P	MIR548O_3P	MIR548O_3P	pos
GCACTTT_MIR175P_MIR20A_MIR106A_MIR106B_MIR20B_MIR519D	MIR4698	MIR7_2_3P	MIR7_2_3P	pos
GCATTTG_MIR105	MIR7_1_3P	MIR6809_3P	MIR6809_3P	pos
GCCATNTTG_YY1_Q6	MIR3646	MIR4729	MIR4729	pos
GENTILE_UV_HIGH_DOSE_DN	MIR495_3P	MIR3680_3P	MIR3680_3P	pos
GFI1_01	MIR520B_3P_MIR520C_3P_MIR520E_3P	MIR519A_3P_MIR519B_3P	MIR519A_3P_MIR519B_3P	pos
GGGTGGRR_PAX4_03	MIR302A_3P_MIR302B_3P_MIR302C_3P_MIR302D_3P	MIR548AB	MIR548AB	pos
GGGYGTGNY_UNKNOWN	MIR1250_3P	MIR513A_3P_MIR513C_3P	MIR513A_3P_MIR513C_3P	pos
GO_AXON_DEVELOPMENT	MIR519A_3P_MIR519B_3P	MIR548O_5P_MIR548W	MIR548O_5P_MIR548W	pos
GO_AXON_PART	MIR373_3P	MIR7_1_3P	MIR7_1_3P	pos
GO_CELL_CELL_SIGNALING	MIR651_3P	MIR548A_5P	MIR548A_5P	pos
GO_CELL_CELL_SIGNALING_BY_WNT	MIR106A_5P	MIR181A_5P_MIR181B_5P	MIR181A_5P_MIR181B_5P	pos
GO_CELL_MORPHOGENESIS_INVOLVED_IN_DIFFERENTIATION	MIR17_5P	MIR548G_3P	MIR548G_3P	pos
GO_CELL_MORPHOGENESIS_INVOLVED_IN_NEURON_DIFFERENTIATION	MIR7856_5P	MIR4422	MIR4422	pos
GO_CELL_PART_MORPHOGENESIS	MIR4495	MIR4482_3P	MIR4482_3P	pos
GO_CELL_PROJECTION_ORGANIZATION	MIR3121_3P	MIR181C_5P	MIR181C_5P	pos
GO_CELLULAR_COMPONENT_MORPHOGENESIS	MIR3606_3P	MIR6867_5P	MIR6867_5P	pos
GO_CELLULAR_RESPONSE_TO_ENDOGENOUS_STIMULUS	MIR4789_5P	MIR548T_5P	MIR548T_5P	pos
GO_CELLULAR_RESPONSE_TO_HORMONE_STIMULUS	MIR93_5P	MIR520D_5P	MIR520D_5P	pos
GO_CELLULAR_RESPONSE_TO_NITROGEN_COMPOUND	MIR205_3P	MIR524_5P	MIR524_5P	pos
GO_CELLULAR_RESPONSE_TO_PEPTIDE	MIR20B_5P	MIR8063	MIR8063	pos
GO_CELLULAR_RESPONSE_TO_PEPTIDE_HORMONE_STIMULUS	MIR513B_5P	MIR548AD_5P_MIR548AE_5P_MIR548AY_5P_MIR548B_5P_MIR548D_5P	MIR548AD_5P_MIR548AE_5P_MIR548AY_5P_MIR548B_5P_MIR548D_5P	pos
GO_CENTRAL_NERVOUS_SYSTEM_DEVELOPMENT	MIR548BC	MIR548AZ_5P	MIR548AZ_5P	pos
GO_CENTROSOME	MIR548A_3P	MIR548I	MIR548I	pos
GO_CHROMATIN_ORGANIZATION	MIR4789_3P	MIR8485	MIR8485	pos
GO_DNA_BINDING_TRANSCRIPTION_ACTIVATOR_ACTIVITY	MIR23C	MIR181D_5P	MIR181D_5P	pos
GO_DNA_BINDING_TRANSCRIPTION_FACTOR_ACTIVITY	MIR664B_3P	MIR548AK_MIR548AM_5P_MIR548C_5P_MIR548H_5P_MIR548O_5P_MIR548AU_5P	MIR548AK_MIR548AM_5P_MIR548C_5P_MIR548H_5P_MIR548O_5P_MIR548AU_5P	pos
GO_DOUBLE_STRANDED_DNA_BINDING	MIR4803	MIR548AS_5P	MIR548AS_5P	pos
GO_ENDOSOMAL_PART	MIR548L	MIR548AP_5P_MIR548J_5P	MIR548AP_5P_MIR548J_5P	pos
GO_ENDOSOME	MIR568	MIR5692B_MIR5692C	MIR5692B_MIR5692C	pos
GO_ENZYME_LINKED_RECEPTOR_PROTEIN_SIGNALING_PATHWAY	MIR522_3P	MIR3606_3P	MIR3606_3P	pos
GO_ESTABLISHMENT_OF_ORGANELLE_LOCALIZATION	MIR30D_5P	MIR548BB_5P	MIR548BB_5P	pos
GO_FOREBRAIN_DEVELOPMENT	MIR513A_3P_MIR513C_3P	MIR548Y	MIR548Y	pos
GO_G_PROTEIN_COUPLED_RECEPTOR_SIGNALING_PATHWAY	MIR9_3P	MIR548AQ_5P	MIR548AQ_5P	pos
GO_GLAND_DEVELOPMENT	MIR23A_3P_MIR23B_3P	MIR497_3P	MIR497_3P	pos
GO_GTPASE_ACTIVITY	MIR8084	MIR3133	MIR3133	pos
GO_HEAD_DEVELOPMENT	MIR519D_3P	MIR944	MIR944	pos
GO_INTRINSIC_COMPONENT_OF_PLASMA_MEMBRANE	MIR30B_5P_MIR30C_5P	MIR30A_3P	MIR30A_3P	pos
GO_KINASE_ACTIVITY	MIR548AZ_3P	LET_7F_1_3P	LET_7F_1_3P	pos
GO_LIPID_BIOSYNTHETIC_PROCESS	MIR30E_5P	MIR30E_3P	MIR30E_3P	pos
GO_MICROTUBULE_BASED_PROCESS	MIR548E_3P	LET_7A_3P	LET_7A_3P	pos
GO_MICROTUBULE_CYTOSKELETON_ORGANIZATION	MIR30A_5P	MIR1323	MIR1323	pos
GO_MICROTUBULE_ORGANIZING_CENTER	MIR224_3P	MIR33A_3P	MIR33A_3P	pos
GO_MOLECULAR_TRANSDUCER_ACTIVITY	MIR548F_3P	LET_7B_3P	LET_7B_3P	pos
GO_MUSCLE_ORGAN_DEVELOPMENT	MIR526B_3P	MIR98_3P	MIR98_3P	pos
GO_MUSCLE_STRUCTURE_DEVELOPMENT	MIR1305	MIR302E	MIR302E	pos
GO_NEGATIVE_REGULATION_OF_BIOSYNTHETIC_PROCESS	MIR548AJ_3P_MIR548X_3P	MIR183_3P	MIR183_3P	pos
GO_NEGATIVE_REGULATION_OF_ORGANELLE_ORGANIZATION	MIR4422	MIR450B_5P	MIR450B_5P	pos
GO_NEGATIVE_REGULATION_OF_RNA_BIOSYNTHETIC_PROCESS	MIR410_3P	MIR3662	MIR3662	pos
GO_NERVOUS_SYSTEM_PROCESS	MIR4760_3P	MIR548AJ_3P_MIR548X_3P	MIR548AJ_3P_MIR548X_3P	pos
GO_NEUROGENESIS	MIR3529_3P			pos
GO_NEURON_DEVELOPMENT	MIR579_3P			pos
GO_NEURON_DIFFERENTIATION	MIR559			pos
GO_ORGANELLE_LOCALIZATION	MIR374B_5P			pos
GO_ORGANIC_ACID_BIOSYNTHETIC_PROCESS	MIR548A_5P			pos
GO_PLASMA_MEMBRANE_PROTEIN_COMPLEX	MIR4666A_3P			pos
GO_POSITIVE_REGULATION_OF_BIOSYNTHETIC_PROCESS	MIR518A_5P_MIR527			pos
GO_POSITIVE_REGULATION_OF_CELL_DEVELOPMENT	MIR3168			pos
GO_POSITIVE_REGULATION_OF_DEVELOPMENTAL_PROCESS	MIR466			pos
GO_POSITIVE_REGULATION_OF_GENE_EXPRESSION	MIR1277_5P			pos
GO_POSITIVE_REGULATION_OF_NEURON_DIFFERENTIATION	MIR7159_3P			pos
GO_POSITIVE_REGULATION_OF_RNA_BIOSYNTHETIC_PROCESS	MIR888_5P			pos
GO_POSITIVE_REGULATION_OF_TRANSCRIPTION_BY_RNA_POLYMERASE_II	MIR548AR_3P			pos
GO_PROXIMAL_PROMOTER_SEQUENCE_SPECIFIC_DNA_BINDING	MIR548AB			pos
GO_RAS_PROTEIN_SIGNAL_TRANSDUCTION	MIR548BB_5P			pos
GO_REGULATION_OF_ANATOMICAL_STRUCTURE_MORPHOGENESIS	MIR548AR_5P			pos
GO_REGULATION_OF_CELL_DEVELOPMENT	MIR548AD_5P_MIR548AE_5P_MIR548AY_5P_MIR548B_5P_MIR548D_5P			pos
GO_REGULATION_OF_CELL_PROJECTION_ORGANIZATION	MIR1468_3P			pos
GO_REGULATION_OF_CHROMOSOME_ORGANIZATION	MIR182_5P			pos
GO_REGULATION_OF_CYTOSKELETON_ORGANIZATION	MIR4729			pos
GO_REGULATION_OF_NERVOUS_SYSTEM_DEVELOPMENT	MIR548AE_3P_MIR548AQ_3P			pos
GO_REGULATION_OF_ORGANELLE_ASSEMBLY	MIR548P			pos
GO_REGULATION_OF_ORGANELLE_ORGANIZATION	MIR576_5P			pos
GO_REGULATION_OF_TRANSMEMBRANE_TRANSPORT	MIR545_5P			pos
GO_REGULATORY_REGION_NUCLEIC_ACID_BINDING	MIR548AH_3P_MIR548AM_3P			pos
GO_RESPONSE_TO_INSULIN	MIR548AK_MIR548AM_5P_MIR548C_5P_MIR548H_5P_MIR548O_5P_MIR548AU_5P			pos
GO_RESPONSE_TO_PEPTIDE	MIR5680			pos
GO_RESPONSE_TO_PEPTIDE_HORMONE	MIR548AS_5P			pos
GO_SEQUENCE_SPECIFIC_DNA_BINDING	MIR548I			pos
GO_SEQUENCE_SPECIFIC_DOUBLE_STRANDED_DNA_BINDING	MIR4668_5P			pos
GO_SUPRAMOLECULAR_COMPLEX	MIR548O_5P_MIR548W			pos
GO_SYNAPTIC_MEMBRANE	MIR3133			pos
GO_TRANSCRIPTION_FACTOR_COMPLEX	MIR548Y			pos
GO_TUBE_DEVELOPMENT	MIR548AP_5P_MIR548J_5P			pos
GO_TUBE_MORPHOGENESIS	MIR3685			pos
GO_VESICLE_LOCALIZATION	MIR548G_3P			pos
GOBERT_OLIGODENDROCYTE_DIFFERENTIATION_DN	MIR5580_3P			pos
GOZGIT_ESR1_TARGETS_DN	MIR548J_3P			pos
GSE10147_IL3_VS_IL3_AND_HIVP17_STIM_PDC_UP	LET_7C_3P			pos
GSE10239_KLRG1INT_VS_KLRG1HIGH_EFF_CD8_TCELL_DN	MIR548AQ_5P			pos
GSE11057_EFF_MEM_VS_CENT_MEM_CD4_TCELL_DN	MIR12124			pos
GSE11057_NAIVE_VS_CENT_MEMORY_CD4_TCELL_UP	MIR5692B_MIR5692C			pos
GSE11057_NAIVE_VS_EFF_MEMORY_CD4_TCELL_UP	MIR8485			pos
GSE11057_NAIVE_VS_MEMORY_CD4_TCELL_UP	MIR4719			pos
GSE11864_CSF1_IFNG_VS_CSF1_PAM3CYS_IN_MAC_UP	MIR92A_3P			pos
GSE11864_UNTREATED_VS_CSF1_IFNG_IN_MAC_DN	MIR92B_3P			pos
GSE13306_TREG_VS_TCONV_SPLEEN_DN	MIR578			pos
GSE13547_CTRL_VS_ANTI_IGM_STIM_ZFX_KO_BCELL_2H_DN	MIR3125			pos
GSE13738_RESTING_VS_BYSTANDER_ACTIVATED_CD4_TCELL_UP	MIR30A_3P			pos
GSE13946_CTRL_VS_DSS_COLITIS_GD_TCELL_FROM_COLON_DN	MIR3916			pos
GSE14308_TH17_VS_NATURAL_TREG_DN	LET_7G_3P			pos
GSE14415_FOXP3_KO_NATURAL_TREG_VS_TCONV_UP	MIR30D_3P			pos
GSE14415_NATURAL_TREG_VS_TCONV_UP	LET_7A_2_3P			pos
GSE15330_HSC_VS_MEGAKARYOCYTE_ERYTHROID_PROGENITOR_DN	MIR208A_5P			pos
GSE16385_MONOCYTE_VS_12H_ROSIGLITAZONE_TREATED_MACROPHAGE_DN	MIR2681_5P			pos
GSE16385_ROSIGLITAZONE_IFNG_TNF_VS_IL4_STIM_MACROPHAGE_DN	MIR30E_3P			pos
GSE16385_ROSIGLITAZONE_IL4_VS_IL4_ALONE_STIM_MACROPHAGE_12H_DN	MIR4799_5P			pos
GSE17186_MEMORY_VS_NAIVE_BCELL_DN	MIR629_3P			pos
GSE17721_0.5H_VS_24H_GARDIQUIMOD_BMDC_DN	MIR208B_5P			pos
GSE17721_CPG_VS_GARDIQUIMOD_2H_BMDC_DN	MIR12123			pos
GSE17721_POLYIC_VS_CPG_12H_BMDC_UP	MIR545_3P			pos
GSE18893_TCONV_VS_TREG_2H_TNF_STIM_DN	MIR371B_5P			pos
GSE20151_CTRL_VS_FUSOBACT_NUCLEATUM_NEUTROPHIL_DN	MIR29B_2_5P			pos
GSE20727_CTRL_VS_H2O2_TREATED_DC_DN	MIR19B_3P			pos
GSE20727_CTRL_VS_H2O2_TREATED_DC_UP	MIR497_3P			pos
GSE21063_CTRL_VS_ANTI_IGM_STIM_BCELL_3H_UP	MIR381_3P			pos
GSE2128_C57BL6_VS_NOD_CD4CD8_DP_THYMOCYTE_UP	MIR548AW			pos
GSE21927_SPLEEN_VS_TUMOR_MONOCYTE_C57BL6_DN	MIR372_5P			pos
GSE21927_SPLENIC_C26GM_TUMOROUS_VS_4T1_TUMOR_MONOCYTES_DN	LET_7B_3P			pos
GSE22886_NAIVE_TCELL_VS_MONOCYTE_UP	MIR33A_3P			pos
GSE24142_DN2_VS_DN3_THYMOCYTE_ADULT_DN	LET_7F_1_3P			pos
GSE24726_WT_VS_E2_2_KO_PDC_UP	LET_7A_3P			pos
GSE25087_TREG_VS_TCONV_FETUS_DN	MIR373_5P			pos
GSE25087_TREG_VS_TCONV_FETUS_UP	MIR5584_3P			pos
GSE25123_WT_VS_PPARG_KO_MACROPHAGE_IL4_AND_ROSIGLITAZONE_STIM_DN	MIR605_3P			pos
GSE25890_CTRL_VS_IL33_IL7_TREATED_NUOCYTES_DN	MIR103A_3P_MIR107			pos
GSE26928_NAIVE_VS_CENT_MEMORY_CD4_TCELL_UP	MIR424_5P			pos
GSE27241_WT_VS_RORGT_KO_TH17_POLARIZED_CD4_TCELL_TREATED_WITH_DIGOXIN_UP	MIR196A_1_3P			pos
GSE27241_WT_VS_RORGT_KO_TH17_POLARIZED_CD4_TCELL_UP	MIR616_5P			pos
GSE2770_IL12_VS_TGFB_AND_IL12_TREATED_ACT_CD4_TCELL_48H_DN	MIR98_3P			pos
GSE27859_MACROPHAGE_VS_CD11C_INT_F480_HI_MACROPHAGE_UP	MIR548N			pos
GSE29164_CD8_TCELL_VS_CD8_TCELL_AND_IL12_TREATED_MELANOMA_DAY7_UP	MIR19A_3P			pos
GSE29164_UNTREATED_VS_CD8_TCELL_AND_IL12_TREATED_MELANOMA_DAY7_UP	MIR300			pos
GSE31082_DN_VS_CD4_SP_THYMOCYTE_DN	MIR32_5P			pos
GSE31082_DN_VS_DP_THYMOCYTE_DN	MIR25_3P			pos
GSE33292_DN3_THYMOCYTE_VS_TCELL_LYMPHOMA_FROM_TCF1_KO_UP	MIR367_3P			pos
GSE339_EX_VIVO_VS_IN_CULTURE_CD8POS_DC_UP	MIR3145_3P			pos
GSE3565_CTRL_VS_LPS_INJECTED_SPLENOCYTES_DN	MIR6715A_3P			pos
GSE360_L_DONOVANI_VS_L_MAJOR_DC_UP	MIR4325			pos
GSE360_L_MAJOR_VS_M_TUBERCULOSIS_MAC_DN	MIR5584_5P			pos
GSE36009_WT_VS_NLRP10_KO_DC_UP	MIR16_5P			pos
GSE36476_CTRL_VS_TSST_ACT_16H_MEMORY_CD4_TCELL_OLD_UP	MIR369_3P			pos
GSE36476_CTRL_VS_TSST_ACT_72H_MEMORY_CD4_TCELL_OLD_UP	MIR548AV_3P			pos
GSE36888_UNTREATED_VS_IL2_TREATED_TCELL_6H_DN	MIR561_3P			pos
GSE37301_LYMPHOID_PRIMED_MPP_VS_COMMON_LYMPHOID_PROGENITOR_UP	MIR363_3P			pos
GSE37301_LYMPHOID_PRIMED_MPP_VS_PRO_BCELL_DN	MIR6859_5P			pos
GSE37532_WT_VS_PPARG_KO_LN_TCONV_UP	MIR195_5P			pos
GSE38304_MYC_NEG_VS_POS_GC_BCELL_UP	MIR15B_5P			pos
GSE3982_EOSINOPHIL_VS_CENT_MEMORY_CD4_TCELL_UP	MIR548AU_3P			pos
GSE3982_MAST_CELL_VS_EFF_MEMORY_CD4_TCELL_UP	MIR144_3P			pos
GSE3982_MEMORY_CD4_TCELL_VS_TH1_UP	MIR4760_5P			pos
GSE3982_MEMORY_CD4_TCELL_VS_TH2_UP	LET_7D_5P			pos
GSE3982_NEUTROPHIL_VS_CENT_MEMORY_CD4_TCELL_DN	MIR497_5P			pos
GSE3982_NEUTROPHIL_VS_TH2_UP	MIR7159_5P			pos
GSE39820_CTRL_VS_TGFBETA3_IL6_CD4_TCELL_DN	MIR421			pos
GSE39820_TGFBETA3_IL6_VS_TGFBETA3_IL6_IL23A_TREATED_CD4_TCELL_UP	MIR15A_5P			pos
GSE40068_CXCR5POS_BCL6POS_TFH_VS_CXCR5NEG_BCL6NEG_CD4_TCELL_DN	MIR4755_5P			pos
GSE40273_GATA1_KO_VS_WT_TREG_DN	MIR4500			pos
GSE40274_LEF1_VS_FOXP3_AND_LEF1_TRANSDUCED_ACTIVATED_CD4_TCELL_UP	MIR587			pos
GSE411_100MIN_VS_400MIN_IL6_STIM_MACROPHAGE_DN	MIR539_5P			pos
GSE41867_DAY15_EFFECTOR_VS_DAY30_EXHAUSTED_CD8_TCELL_LCMV_CLONE13_DN	MIR4677_5P			pos
GSE41867_DAY8_VS_DAY15_LCMV_CLONE13_EFFECTOR_CD8_TCELL_UP	MIR4735_5P			pos
GSE41867_NAIVE_VS_DAY6_LCMV_ARMSTRONG_EFFECTOR_CD8_TCELL_UP	MIR3065_5P			pos
GSE42724_NAIVE_VS_B1_BCELL_UP	MIR4762_3P			pos
GSE45739_UNSTIM_VS_ACD3_ACD28_STIM_NRAS_KO_CD4_TCELL_UP	MIR454_3P			pos
GSE46606_IRF4HIGH_VS_WT_CD40L_IL2_IL5_DAY3_STIMULATED_BCELL_UP	MIR330_3P			pos
GSE5099_UNSTIM_VS_MCSF_TREATED_MONOCYTE_DAY7_UP	MIR5006_3P			pos
GSE5142_CTRL_VS_HTERT_TRANSDUCED_CD8_TCELL_EARLY_PASSAGE_CLONE_UP	MIR141_3P			pos
GSE5542_UNTREATED_VS_IFNA_TREATED_EPITHELIAL_CELLS_6H_DN	MIR6838_5P			pos
GSE5542_UNTREATED_VS_IFNG_TREATED_EPITHELIAL_CELLS_6H_UP	MIR511_5P			pos
GSE5589_LPS_AND_IL10_VS_LPS_AND_IL6_STIM_MACROPHAGE_45MIN_UP	MIR200A_3P			pos
GSE5589_LPS_VS_LPS_AND_IL10_STIM_MACROPHAGE_180MIN_DN	MIR3941			pos
GSE5679_CTRL_VS_PPARG_LIGAND_ROSIGLITAZONE_TREATED_DC_DN	MIR543			pos
GSE6259_BCELL_VS_CD8_TCELL_DN	MIR5696			pos
GSE6259_FLT3L_INDUCED_33D1_POS_DC_VS_BCELL_DN	MIR4796_3P			pos
GSE6674_ANTI_IGM_VS_CPG_STIM_BCELL_UP	MIR130B_3P			pos
GSE6674_UNSTIM_VS_ANTI_IGM_STIM_BCELL_UP	MIR8066			pos
GSE6681_DELETED_FOXP3_VS_WT_TREG_DN	MIR5589_3P			pos
GSE7568_CTRL_VS_24H_TGFB_TREATED_MACROPHAGES_WITH_IL4_AND_DEXAMETHASONE_UP	MIR135A_5P			pos
GSE7831_UNSTIM_VS_CPG_STIM_PDC_1H_DN	MIR3124_3P			pos
GSE7852_THYMUS_VS_FAT_TCONV_UP	MIR4680_3P			pos
GSE9316_CD4_TCELL_BALBC_VS_TH17_ENRI_CD4_TCELL_SKG_PMA_IONO_STIM_FR4NEG_DN	MIR548E_5P			pos
GSE9960_HEALTHY_VS_GRAM_NEG_SEPSIS_PBMC_UP	MIR548H_3P_MIR548Z			pos
GSE9988_LOW_LPS_VS_ANTI_TREM1_AND_LPS_MONOCYTE_DN	MIR6876_5P			pos
GTGACGY_E4F1_Q6	MIR507			pos
GTGCAAT_MIR25_MIR32_MIR92_MIR363_MIR367	MIR1252_3P			pos
GTTTGTT_MIR495	MIR875_3P			pos
HALLMARK_HEME_METABOLISM	MIR548AC			pos
HAMAI_APOPTOSIS_VIA_TRAIL_UP	MIR4311			pos
HAN_SATB1_TARGETS_DN	MIR8054			pos
HLF_01	MIR4295			pos
IRF1_Q6	MIR377_3P			pos
IVANOVA_HEMATOPOIESIS_MATURE_CELL	MIR128_3P			pos
JOHNSTONE_PARVB_TARGETS_2_DN	MIR3666			pos
JOHNSTONE_PARVB_TARGETS_3_DN	MIR302F			pos
KAECH_NAIVE_VS_DAY15_EFF_CD8_TCELL_DN	MIR5590_3P			pos
KARLSSON_TGFB1_TARGETS_DN	MIR4458			pos
KEGG_MAPK_SIGNALING_PATHWAY	MIR142_5P			pos
KIM_WT1_TARGETS_DN	MIR548AV_5P_MIR548K			pos
KRIGE_RESPONSE_TO_TOSEDOSTAT_24HR_UP	MIR6507_5P			pos
KRIGE_RESPONSE_TO_TOSEDOSTAT_6HR_UP	MIR135B_5P			pos
LEE_BMP2_TARGETS_UP	MIR301B_3P			pos
LEE_RECENT_THYMIC_EMIGRANT	MIR548D_3P			pos
LIU_PROSTATE_CANCER_DN				pos
LMO2COM_01				pos
MARSON_BOUND_BY_FOXP3_UNSTIMULATED				pos
MARTORIATI_MDM4_TARGETS_FETAL_LIVER_DN				pos
MAX_01				pos
MEIS1_01				pos
MEISSNER_BRAIN_HCP_WITH_H3K4ME3_AND_H3K27ME3				pos
MILI_PSEUDOPODIA_HAPTOTAXIS_UP				pos
MODULE_117				pos
MODULE_37				pos
MULLIGHAN_NPM1_MUTATED_SIGNATURE_1_UP				pos
MYCMAX_01				pos
MYCMAX_03				pos
MYOD_01				pos
NAKAMURA_TUMOR_ZONE_PERIPHERAL_VS_CENTRAL_DN				pos
NFKB_Q6_01				pos
NUYTTEN_EZH2_TARGETS_UP				pos
NUYTTEN_NIPP1_TARGETS_DN				pos
OCT_Q6				pos
OCT1_04				pos
OCT1_06				pos
OCT1_Q5_01				pos
OISHI_CHOLANGIOMA_STEM_CELL_LIKE_UP				pos
ONDER_CDH1_TARGETS_2_DN				pos
ONKEN_UVEAL_MELANOMA_UP				pos
OSMAN_BLADDER_CANCER_DN				pos
PEDRIOLI_MIR31_TARGETS_DN				pos
PILON_KLF1_TARGETS_DN				pos
PILON_KLF1_TARGETS_UP				pos
PLASARI_TGFB1_TARGETS_10HR_DN				pos
PURBEY_TARGETS_OF_CTBP1_NOT_SATB1_DN				pos
PXR_Q2				pos
PYEON_CANCER_HEAD_AND_NECK_VS_CERVICAL_UP				pos
RAO_BOUND_BY_SALL4				pos
RAO_BOUND_BY_SALL4_ISOFORM_B				pos
REACTOME_CYTOKINE_SIGNALING_IN_IMMUNE_SYSTEM				pos
REACTOME_G_ALPHA_I_SIGNALLING_EVENTS				pos
REACTOME_NEURONAL_SYSTEM				pos
REACTOME_SIGNALING_BY_GPCR				pos
RGAGGAARY_PU1_Q6				pos
RODRIGUES_THYROID_CARCINOMA_ANAPLASTIC_DN				pos
RODRIGUES_THYROID_CARCINOMA_ANAPLASTIC_UP				pos
RODRIGUES_THYROID_CARCINOMA_POORLY_DIFFERENTIATED_DN				pos
RODRIGUES_THYROID_CARCINOMA_POORLY_DIFFERENTIATED_UP				pos
RODWELL_AGING_KIDNEY_DN				pos
RODWELL_AGING_KIDNEY_NO_BLOOD_DN				pos
RRAGTTGT_UNKNOWN				pos
RTAAACA_FREAC2_01				pos
SCHLOSSER_SERUM_RESPONSE_DN				pos
SENESE_HDAC3_TARGETS_UP				pos
SENGUPTA_NASOPHARYNGEAL_CARCINOMA_WITH_LMP1_UP				pos
SHEN_SMARCA2_TARGETS_UP				pos
SMID_BREAST_CANCER_BASAL_UP				pos
STTTCRNTTT_IRF_Q6				pos
TAL1BETAE47_01				pos
TATAAA_TATA_01				pos
TATTATA_MIR374				pos
TBK1.DF_DN				pos
TCCATTKW_UNKNOWN				pos
TGAATGT_MIR181A_MIR181B_MIR181C_MIR181D				pos
TGACAGNY_MEIS1_01				pos
TGACATY_UNKNOWN				pos
TGANTCA_AP1_C				pos
TGAYRTCA_ATF3_Q6				pos
TGCACTT_MIR519C_MIR519B_MIR519A				pos
TGCTGAY_UNKNOWN				pos
TGFB_UP.V1_DN				pos
TGGAAA_NFAT_Q4_01				pos
TGGTGCT_MIR29A_MIR29B_MIR29C				pos
TGTTTAC_MIR30A5P_MIR30C_MIR30D_MIR30B_MIR30E5P				pos
TGTTTGY_HNF3_Q6				pos
TORCHIA_TARGETS_OF_EWSR1_FLI1_FUSION_DN				pos
TORCHIA_TARGETS_OF_EWSR1_FLI1_FUSION_UP				pos
TTAYRTAA_E4BP4_01				pos
TTTGCAC_MIR19A_MIR19B				pos
TTTTGAG_MIR373				pos
USF_01				pos
USF_02				pos
USF_Q6_01				pos
VEGF_A_UP.V1_DN				pos
WANG_RESPONSE_TO_GSK3_INHIBITOR_SB216763_UP				pos
WHN_B				pos
WONG_ADULT_TISSUE_STEM_MODULE				pos
WTGAAAT_UNKNOWN				pos
YAGI_AML_WITH_T_9_11_TRANSLOCATION				pos
YKACATTT_UNKNOWN				pos
YTATTTTNR_MEF2_02				pos
YY1_02				pos
ZHENG_BOUND_BY_FOXP3				pos
ZID_01				pos

## Sheet: AACUUU_targeting_miRNA
miRNAs potentially targeting AACUUU
miR-548at-5p	AAAAGUUAUUGCGGUUUUGGCU
326_104 (cloned from a MNA tumor)	GACAAAGTTATGAAATGGTA
miR-148a-5p	AAAGUUCUGAGACACUCCGACU
miR-561-3p	CAAAGUUUAAGAUCCUUGAAGU

## Sheet: K1K2R_mis-expressed
kalirin-GEF1 inhibitor#1 kalirin-GEF1 inhibitor#2 RAC1 inhibitor mis-downregulated	kalirin-GEF1 inhibitor#1 kalirin-GEF1 inhibitor#2 RAC1 inhibitor mis-upregulated
GO_ION_TRANSPORT	CAIRO_HEPATOBLASTOMA_CLASSES_UP
MEISSNER_BRAIN_HCP_WITH_H3K4ME3_AND_H3K27ME3	PUJANA_CHEK2_PCC_NETWORK
GO_BIOLOGICAL_ADHESION	GO_CHROMOSOME
GO_REGULATION_OF_HYDROLASE_ACTIVITY	DODD_NASOPHARYNGEAL_CARCINOMA_DN
GO_LIPID_METABOLIC_PROCESS	WEI_MYCN_TARGETS_WITH_E_BOX
DODD_NASOPHARYNGEAL_CARCINOMA_UP	KINSEY_TARGETS_OF_EWSR1_FLII_FUSION_UP
GO_ION_TRANSMEMBRANE_TRANSPORT	GO_RIBONUCLEOPROTEIN_COMPLEX
GO_CYTOSKELETAL_PROTEIN_BINDING	ACEVEDO_LIVER_CANCER_UP
GO_NEGATIVE_REGULATION_OF_SIGNALING	FISCHER_DREAM_TARGETS
GO_CELLULAR_LIPID_METABOLIC_PROCESS	LEE_BMP2_TARGETS_DN
GO_INORGANIC_ION_TRANSMEMBRANE_TRANSPORT	MODULE_98
GO_NEGATIVE_REGULATION_OF_RESPONSE_TO_STIMULUS	PUJANA_BRCA1_PCC_NETWORK
	MOHANKUMAR_HOXA1_TARGETS_UP
	ACEVEDO_LIVER_TUMOR_VS_NORMAL_ADJACENT_TISSUE_UP
	MORF_RAD23A
	GO_POSTTRANSCRIPTIONAL_REGULATION_OF_GENE_EXPRESSION
	GO_CHROMOSOME_ORGANIZATION
	MORF_DEK
	REACTOME_POST_TRANSLATIONAL_PROTEIN_MODIFICATION
	CHICAS_RB1_TARGETS_SENESCENT
	MORF_GNB1
	GO_PEPTIDE_BIOSYNTHETIC_PROCESS
	GO_DOUBLE_STRANDED_DNA_BINDING
	GO_SEQUENCE_SPECIFIC_DNA_BINDING
	REACTOME_METABOLISM_OF_RNA
	BENPORATH_EED_TARGETS
	GO_SEQUENCE_SPECIFIC_DOUBLE_STRANDED_DNA_BINDING
	RODRIGUES_THYROID_CARCINOMA_ANAPLASTIC_UP
	GO_CELLULAR_RESPONSE_TO_DNA_DAMAGE_STIMULUS
	CACGTG_MYC_Q2
	GO_CHROMATIN_ORGANIZATION
	GO_DNA_METABOLIC_PROCESS
	REACTOME_TRANSLATION
	JOHNSTONE_PARVB_TARGETS_3_DN
	GCCATNTTG_YY1_Q6
	GO_RNA_METABOLIC_PROCESS
	GO_CELLULAR_AMIDE_METABOLIC_PROCESS
	KRIGE_RESPONSE_TO_TOSEDOSTAT_6HR_DN
	PILON_KLF1_TARGETS_DN
	GO_POSITIVE_REGULATION_OF_GENE_EXPRESSION
	DIAZ_CHRONIC_MEYLOGENOUS_LEUKEMIA_UP
